# Supplementary material for: Holocene land cover change in North America: continental trends, regional drivers, and implications for vegetation-atmosphere feedbacks
Source: Copernicus journal article supplement (doi:10.5194/cp-2024-6), 2024-02-20
Supplement: Supplementary file 2 [file cp-2024-6-supplement.zip]

Archive with 2 entries (2 files):
- Holocene_land_cover_trends_supplement.pdf
- Holocene_land_cover_trends_supplement_table1.docx
