# Supplementary material for: Holocene land cover change in North America: continental trends, regional drivers, and implications for vegetation-atmosphere feedbacks
Source: Copernicus journal article supplement (doi:10.5194/cp-2024-6), 2024-02-20
Supplement: Supplementary file 2 [file cp-2024-6-supplement.zip › Holocene_land_cover_trends_supplement_table1.docx]

**Supplementary Table 1**

Pollen records used in this analysis. The site name, dataset id, latitude, longitude, elevation, lake size (if available), data citation, and DOI are indicated.

| Site name | Dataset ID | Latitude | Longitude | Lake size (ha) | Elevation (m) | Citation | DOI |
| --- | --- | --- | --- | --- | --- | --- | --- |
| Hafichuk Site | 1000 | 50.32 | -105.88 | 50.32 | 740 | Ritchie, James C.. Hafichuk Site | 10.21233/n3542q |
| Hail Lake | 1001 | 60.03 | -129.02 | 60.03 | 690 | Cwynar, Les C.. Hail Lake | 10.21233/n31d9w |
| Hams Lake | 1002 | 43.24 | -80.41 | 43.24 | 301 | Bennett, Keith D.. Hams Lake | 10.21233/n39k8q |
| Hanging Lake | 1003 | 68.38 | -138.38 | 68.38 | 500 | Cwynar, Les C.. Hanging Lake | 10.21233/n35s6s |
| Hansen Marsh | 1004 | 43.44 | -89.67 | 43.44 | 381 | Maher, Louis J., Jr.. Hansen Marsh | 10.21233/n3233t |
| Harding Lake | 1006 | 64.44 | -146.91 | 64.44 | NA | Ager, Thomas A.. Harding Lake | 10.21233/n3hf05 |
| Lac Harriman | 1007 | 48.24 | -65.84 | 48.24 | 65 | Jetté, Hélène; Larouche, Alayn C.; Richard, Pierre J. H.. Lac Harriman | 10.21233/n3cm6x |
| Harrie Lake | 1008 | 52.93 | -66.95 | 52.93 | 530 | King, George A.. Harrie Lake | 10.21233/n37x41 |
| Hawke Hills Kettle | 1010 | 47.32 | -53.13 | 47.32 | 220 | Macpherson, Joyce B.. Hawke Hills Kettle | 10.21233/n34411 |
| Hawley Bog Pond-1 | 1012 | 42.57 | -72.88 | 42.57 | 549 | Patterson, William Albert, III. Hawley Bog Pond-1 | 10.21233/n30f0h |
| Hay Lake | 1013 | 34 | -109.42 | 34 | 2780 | Jacobs, Bonnie Fine. Hay Lake | 10.21233/n38k71 |
| Headwaters Lake | 1024 | 67.93 | -155.05 | 67.93 | 820 | Brubaker, Linda Beck. Headwaters Lake | 10.21233/n3fd87 |
| Hebron Lake | 1028 | 58.2 | -63.03 | 58.2 | 170 | Lamb, Henry F.. Hebron Lake | 10.21233/n35x4d |
| Hedrick Pond | 1030 | 43.75 | -110.6 | 43.75 | 2073 | Whitlock, Cathy. Hedrick Pond | 10.21233/n3bd08 |
| Helmetta Bog | 1031 | 40.38 | -74.43 | 40.38 | 15 | Watts, William A.. Helmetta Bog | 10.21233/n36p8t |
| Hemo Pond | 1032 | 47.13 | -95.47 | 47.13 | 499 | McAndrews, John H.. Hemo Pond | 10.21233/n32w44 |
| Tourbière de Lanoraie HENRI | 1033 | 45.99 | -73.3 | 45.99 | 18 | Comtois, Paul G.. Tourbière de Lanoraie HENRI | 10.21233/n3j71s |
| Northeast Shark River Slough | 10967 | 25.75 | -80.58 | 25.75 | 1 | Glaser, Paul H.; Hansen, Barbara C. S.. Northeast Shark River Slough | 10.21233/je2r-dk10 |
| South Heron Lake | 10970 | 43.72 | -95.23 | 43.72 | 428 | Cushing, Edward J., Jr.; Hansen, Barbara C. S.. South Heron Lake | 10.21233/1ske-b848 |
| Ocheda Lake | 10971 | 43.57 | -95.59 | 43.57 | 476 | Cushing, Edward J., Jr.; Hansen, Barbara C. S.. Ocheda Lake | 10.21233/7pch-yz97 |
| Blomford Lake | 10973 | 45.49 | -93.15 | 45.49 | 291 | Cushing, Edward J., Jr.. Blomford Lake | 10.21233/782e-xx09 |
| Fawn Lake | 10974 | 45.41 | -93.05 | 45.41 | 274 | Cushing, Edward J., Jr.. Fawn Lake | 10.21233/jn23-6n72 |
| Frovold Lake | 10975 | 45.38 | -95.56 | 45.38 | 318 | Cushing, Edward J., Jr.. Frovold Lake | 10.21233/z86h-t355 |
| Goose Lake | 10976 | 44.99 | -94.59 | 44.99 | 334 | Cushing, Edward J., Jr.. Goose Lake | 10.21233/n23c-dv84 |
| Olson Lake | 10977 | 46.51 | -93.66 | 46.51 | 379 | Cushing, Edward J., Jr.. Olson Lake | 10.21233/f2sx-6t30 |
| Little Dyke Lake | 10981 | 45.39 | -63.56 | 45.39 | 10 | Frappier, Monique G.. Little Dyke Lake | 10.21233/149e-e689 |
| Round Grove Lake | 10983 | 44.71 | -94.49 | 44.71 | 318 | Cushing, Edward J., Jr.. Round Grove Lake | 10.21233/vz95-6257 |
| Hidden Lake | 1104 | 60.48 | -150.26 | 60.48 | NA | Ager, Thomas A.. Hidden Lake | 10.21233/n3c717 |
| High Lake | 1105 | 44.52 | -76.6 | 44.52 | 192 | Fuller, Janice L.. High Lake | 10.21233/n37d9r |
| Honeymoon Pond | 1107 | 64.63 | -138.4 | 64.63 | 1160 | Cwynar, Les C.. Honeymoon Pond | 10.21233/n33q7v |
| Blocknic Lake [Horse Pond] | 1109 | 47.18 | -95.87 | 47.18 | 393 | McAndrews, John H.. Blocknic Lake [Horse Pond] | 10.21233/n3cw4x |
| Horseshoe Lake | 1110 | 45.46 | -93.05 | 45.46 | 277 | Cushing, Edward J., Jr.. Horseshoe Lake | 10.21233/n3863q |
| Hostage Lake | 1111 | 46.55 | -94.13 | 46.55 | 368 | Almendinger, John C.. Hostage Lake | 10.21233/n34c9g |
| Howes Prairie Marsh | 1114 | 41.65 | -87.07 | 41.65 | 185 | Cole, Kenneth L.. Howes Prairie Marsh | 10.21233/n3b729 |
| Hudson Lake | 1133 | 41.67 | -86.53 | 41.67 | 239 | Bailey, Robert E.. Hudson Lake | 10.21233/n30t6k |
| Hug Lake | 1134 | 47.96 | -90.93 | 47.96 | 570 | Swain, Albert M.. Hug Lake | 10.21233/n3905q |
| Humber Pond 3 | 1135 | 43.64 | -79.48 | 43.64 | 74 | McAndrews, John H.. Humber Pond 3 | 10.21233/n3562d |
| Humber Pond 5 | 1136 | 43.64 | -79.49 | 43.64 | 74 | McAndrews, John H.. Humber Pond 5 | 10.21233/n31g9k |
| Humber Pond 7 | 1137 | 43.65 | -79.5 | 43.65 | 74 | McAndrews, John H.. Humber Pond 7 | 10.21233/n3gt6x |
| Hynes Brook Salt Marsh | 1139 | 48.62 | -58.97 | 48.62 | 0 | McAndrews, John H.. Hynes Brook Salt Marsh | 10.21233/n37b0n |
| Iglutalik Lake | 1142 | 66.14 | -66.08 | 66.14 | 90 | Davis, P. Thompson. Iglutalik Lake | 10.21233/n3803n |
| Indian Lake | 1147 | 50.92 | -90.45 | 50.92 | 383 | Björck, Svante. Indian Lake | 10.21233/tp4a-h605 |
| Indian Prairie Fen | 1148 | 44.63 | -122.58 | 44.63 | 988 | Sea, Debra S.; Whitlock, Cathy. Indian Prairie Fen | 10.21233/n36b0b |
| Inglesby Lake | 1149 | 44.48 | -77.05 | 44.48 | 167 | McAndrews, John H.. Inglesby Lake | 10.21233/n32m8w |
| Keystone Iron Fen | 1152 | 38.87 | -107.03 | 38.87 | 2920 | Fall, Patricia Lynn. Keystone Iron Fen | 10.21233/n3704q |
| Irvin Lake | 1153 | 47.14 | -93.64 | 47.14 | 478 | Cushing, Edward J., Jr.. Irvin Lake | 10.21233/n3392t |
| Jack Lake | 1157 | 47.32 | -81.77 | 47.32 | 430 | Liu, Kam-biu. Jack Lake | 10.21233/n35b01 |
| Jackson Pond | 1160 | 37.43 | -85.72 | 37.43 | 260 | Wilkins, G. R.. Jackson Pond | 10.21233/n3634f |
| Jacob Lake | 1162 | 34.33 | -110.83 | 34.33 | 2285 | Jacobs, Bonnie Fine. Jacob Lake | 10.21233/n3hm8x |
| Jacobson Lake | 1163 | 46.42 | -92.72 | 46.42 | 324 | Watts, William A.. Jacobson Lake | 10.21233/n3cx3w |
| James Bay | 1171 | 50.22 | -80.2 | 50.22 | NA | McAndrews, John H.. James Bay | 10.21233/n3bx4z |
| Little Dollar Lake | 12001 | 46.19 | -85.31 | 46.19 | 258 | Futyma, Richard. Little Dollar Lake | 10.21233/e5nq-qh91 |
| Last Lake | 12004 | 45.45 | -95.24 | 45.45 | 396 | Alwin, Baird Christopher. Last Lake | 10.21233/6a9a-7y95 |
| Cottonwood Lake | 12005 | 44.62 | -95.68 | 44.62 | 324 | Cushing, Edward J., Jr.; Hansen, Barbara C. S.. Cottonwood Lake | 10.21233/actc-2h32 |
| Monson Lake | 12006 | 45.32 | -95.28 | 45.32 | 376 | Cushing, Edward J., Jr.. Monson Lake | 10.21233/fzw2-2z48 |
| Deans Lake | 12007 | 44.78 | -93.45 | 44.78 | 228 | Shane, Linda C. K.. Deans Lake | 10.21233/gava-5q79 |
| Lake Emily | 12008 | 44.31 | -93.92 | 44.31 | 302 | Shane, Linda C. K.. Lake Emily | 10.21233/y7s7-kx09 |
| Perch Lake | 12009 | 46.19 | -95.47 | 46.19 | 477 | Cushing, Edward J., Jr.; Liljegren, Fred A.. Perch Lake | 10.21233/pvgz-jc30 |
| Chub Lake | 12010 | 44.56 | -93.22 | 44.56 | 294 | Cushing, Edward J., Jr.; Liljegren, Fred A.. Chub Lake | 10.21233/wp0e-sw65 |
| Lake Rachel | 12011 | 45.8 | -95.55 | 45.8 | 415 | Cushing, Edward J., Jr.; Liljegren, Fred A.. Lake Rachel | 10.21233/vns4-hb83 |
| Ziebell Lake | 12012 | 46.06 | -95.26 | 46.06 | 425 | Cushing, Edward J., Jr.; Liljegren, Fred A.. Ziebell Lake | 10.21233/pzda-7x32 |
| Mud Lake | 12013 | 45.86 | -95.46 | 45.86 | 415 | Cushing, Edward J., Jr.; Liljegren, Fred A.. Mud Lake | 10.21233/tghx-m377 |
| Lybeck Lake | 12014 | 45.67 | -95.71 | 45.67 | 356 | Cushing, Edward J., Jr.; Liljegren, Fred A.. Lybeck Lake | 10.21233/7m6v-8h52 |
| Union Lake | 12015 | 45.82 | -95.34 | 45.82 | 423 | Cushing, Edward J., Jr.; Liljegren, Fred A.. Union Lake | 10.21233/xtcz-3s14 |
| Albert Lea Lake | 12016 | 43.65 | -93.28 | 43.65 | 369 | Cushing, Edward J., Jr.; Kachman, Robert G.. Albert Lea Lake | 10.21233/1vza-s570 |
| Everhart Lake | 12024 | 43.62 | -93.44 | 43.62 | 392 | Cushing, Edward J., Jr.; Kachman, Robert G.. Everhart Lake | 10.21233/kh4s-0e07 |
| Saint-Jean Ile d'Orléans | 1254 | 46.93 | -70.93 | 46.93 | 68 | Larouche, Alayn C.; Richard, Pierre J. H.. Saint-Jean Ile d'Orléans | 10.21233/n31w6k |
| Jewell Site | 1255 | 42.26 | -93.7 | 42.26 | 317 | Baker, Richard G.. Jewell Site | 10.21233/n3h72v |
| Sharkey Lake | 13029 | 44.59 | -93.41 | 44.59 | 305 | Umbanhowar, Charles E., Jr.. Sharkey Lake | 10.21233/qf6p-8j75 |
| Kimble Pond | 13032 | 44.22 | -93.84 | 44.22 | 311 | Umbanhowar, Charles E., Jr.. Kimble Pond | 10.21233/m2a2-qq61 |
| Irwin Smith Bog | 13047 | 45.03 | -83.61 | 45.03 | 223 | Blaauw, Maarten; Booth, Robert K.; Brewer, Simon; Jackson, Stephen T.; Minckley, Thomas A.. Irwin Smith Bog | 10.21233/anc4-fp20 |
| West Olaf Lake | 13051 | 46.6 | -96.19 | 46.6 | 393 | Nelson, David M.. West Olaf Lake | 10.21233/g3qv-vs64 |
| Oak Glen Lake | 13056 | 43.93 | -93.08 | 43.93 | 391 | Cushing, Edward J., Jr.; Kachman, Robert G.. Oak Glen Lake | 10.21233/4479-g247 |
| Camp Lake | 13057 | 45.41 | -95.39 | 45.41 | 344 | Cushing, Edward J., Jr.; Kachman, Robert G.. Camp Lake | 10.21233/2k47-rn72 |
| Adeline Lake | 13060 | 46.3 | -91.17 | 46.3 | 418 | Calcote, Randy; Hotchkiss, Sara C.. Adeline Lake | 10.21233/rja4-q512 |
| Elevenses Lake | 13069 | 46.38 | -91.49 | 46.38 | 355 | Calcote, Randy; Hotchkiss, Sara C.; Lynch, Elizabeth A.. Elevenses Lake | 10.21233/638z-xp12 |
| Eska Lake | 13071 | 45.19 | -90.61 | 45.19 | 443 | Calcote, Randy; Hotchkiss, Sara C.. Eska Lake | 10.21233/zw81-nc35 |
| Fallison Lake | 13073 | 45.99 | -89.62 | 45.99 | 501 | Calcote, Randy. Fallison Lake | 10.21233/wwc5-6x04 |
| Glimmerglass Lake | 13097 | 46.22 | -89.32 | 46.22 | 522 | Brugam, Richard Blair. Glimmerglass Lake | 10.21233/7dx1-dt81 |
| Joe Lake | 1390 | 66.77 | -157.22 | 66.77 | 183 | Anderson, Patricia M.. Joe Lake | 10.21233/n39t6c |
| Joes Pond | 1391 | 48.24 | -58.24 | 48.24 | 100 | McAndrews, John H.. Joes Pond | 10.21233/n3643d |
| Johnson River Bog | 1392 | 63.71 | -144.65 | 63.71 | 442 | Ager, Thomas A.. Johnson River Bog | 10.21233/n32f1h |
| Tourbière du lac Joncas | 1393 | 47.26 | -71.16 | 47.26 | 747 | Larouche, Alayn C.; Richard, Pierre J. H.. Tourbière du lac Joncas | 10.21233/n3bk9d |
| Tourbière de Lanoraie JOSEPH | 1397 | 45.99 | -73.3 | 45.99 | 18 | Comtois, Paul G.. Tourbière de Lanoraie JOSEPH | 10.21233/n36s63 |
| Brewster Creek | 14104 | 41.98 | -88.24 | 41.98 | 229 | Grimm, Eric Christopher; Hansen, Barbara C. S.. Brewster Creek | 10.21233/qaht-6745 |
| Bass Lake | 14270 | 45.2 | -94.88 | 45.2 | 361 | Umbanhowar, Charles E., Jr.. Bass Lake | 10.21233/4b1p-c888 |
| Kaiyak Lake | 1432 | 68.15 | -161.42 | 68.15 | 190 | Anderson, Patricia M.. Kaiyak Lake | 10.21233/n38q7d |
| Kanaaupscow | 1437 | 54.03 | -76.64 | 54.03 | 200 | Larouche, Alayn C.; Richard, Pierre J. H.. Kanaaupscow | 10.21233/n3205j |
| Linsley Pond | 14370 | 41.32 | -72.78 | 41.32 | 9 | Brugam, Richard Blair. Linsley Pond | 10.21233/s4yh-p034 |
| Lake Sallie | 14403 | 46.77 | -95.9 | 46.77 | 405 | Birks, Hilary H.. Lake Sallie | 10.21233/yy7y-q905 |
| Tower Lake | 14410 | 46.54 | -86.04 | 46.54 | 261 | Andersen, Jennifer Jewell; Booth, Robert K.; Jackson, Stephen T.; Jones, Rachel A.; Minckley, Thomas A.; Reeves, Kelly. Tower Lake | 10.21233/j2hz-1p75 |
| Chappice Lake | 14426 | 50.17 | -110.36 | 50.17 | 731 | Strong, Wayne L.. Chappice Lake | 10.21233/keqt-5s24 |
| Eagle Lake | 14427 | 51 | -113.32 | 51 | 922 | Strong, Wayne L.. Eagle Lake | 10.21233/be1a-vb86 |
| Bellshill Lake | 14428 | 52.6 | -111.56 | 52.6 | 662 | Strong, Wayne L.. Bellshill Lake | 10.21233/h6q3-eb53 |
| Gooseberry Lake | 14429 | 52.12 | -110.74 | 52.12 | 698 | Strong, Wayne L.. Gooseberry Lake | 10.21233/xfyt-p148 |
| Keiver's Lake | 14430 | 51.69 | -113.55 | 51.69 | 912 | Strong, Wayne L.. Keiver's Lake | 10.21233/fkj7-bs08 |
| Little Fish Lake | 14431 | 51.38 | -112.23 | 51.38 | 903 | Strong, Wayne L.. Little Fish Lake | 10.21233/xbce-2f60 |
| Lloyd Lake [Red Deer Lake] | 14432 | 50.87 | -114.16 | 50.87 | 1133 | Strong, Wayne L.. Lloyd Lake [Red Deer Lake] | 10.21233/tsd2-k298 |
| Red Deer Lake | 14433 | 52.72 | -113.06 | 52.72 | 775 | Strong, Wayne L.. Red Deer Lake | 10.21233/rm6n-jj66 |
| Twelve Mile Coulee | 14434 | 50.21 | -111.64 | 50.21 | 790 | Strong, Wayne L.. Twelve Mile Coulee | 10.21233/q9hm-r007 |
| Johnson Lake | 14435 | 45.44 | -95.27 | 45.44 | 364 | Cushing, Edward J., Jr.; Kachman, Robert G.. Johnson Lake | 10.21233/ztem-h356 |
| Tower Lake | 14443 | 46.54 | -86.04 | 46.54 | 261 | Andersen, Jennifer Jewell; Booth, Robert K.; Jackson, Stephen T.; Jones, Rachel A.; Minckley, Thomas A.; Reeves, Kelly. Tower Lake | 10.21233/v823-aq67 |
| Hell Hole Lake | 14446 | 45.79 | -92.22 | 45.79 | 298 | Calcote, Randy; Hotchkiss, Sara C.; Lynch, Elizabeth A.. Hell Hole Lake | 10.21233/ptaw-4d96 |
| Keele Lake | 1445 | 64.17 | -127.62 | 64.17 | 1150 | Szeicz, Julian M.. Keele Lake | 10.21233/n3106m |
| Kegan Lake | 1446 | 44.76 | -93.12 | 44.76 | 285 | McAndrews, John H.. Kegan Lake | 10.21233/n3gb2k |
| Kellys Hollow | 1447 | 45.3 | -90.35 | 45.3 | 470 | Heide, Kathleen M.. Kellys Hollow | 10.21233/n3bj0n |
| Kellners Lake | 1448 | 44.24 | -87.85 | 44.24 | 261 | Maher, Louis J., Jr.. Kellners Lake | 10.21233/n36t7t |
| Browns Island | 14491 | 38.04 | -121.87 | 38.04 | 0 | May, Michael Duncan. Browns Island | 10.21233/xyvh-px20 |
| Roe Island | 14494 | 38.07 | -122.03 | 38.07 | 0 | May, Michael Duncan. Roe Island | 10.21233/npm2-8d68 |
| Dog Lake | 14498 | 50.78 | -115.93 | 50.78 | 1183 | Hallett, Douglas J.. Dog Lake | 10.21233/w0ab-4w11 |
| Kennys Pond | 1450 | 47.59 | -52.71 | 47.59 | 70 | Macpherson, Joyce B.. Kennys Pond | 10.21233/n33156 |
| Lac Kénogami | 1451 | 48.37 | -71.57 | 48.37 | 166 | Larouche, Alayn C.; Richard, Pierre J. H.. Lac Kénogami | 10.21233/n3c929 |
| Alpine Pond | 14517 | 37.64 | -112.82 | 37.64 | 3200 | Anderson, R. Scott; Hasbargen, Jim. Alpine Pond | 10.21233/08cd-df16 |
| Kenosee Lake | 1452 | 49.82 | -102.3 | 49.82 | 746 | Porter, Stephen C.. Kenosee Lake | 10.21233/n37h1r |
| Lily Lake | 14535 | 44.19 | -93.64 | 44.19 | 311 | Umbanhowar, Charles E., Jr.. Lily Lake | 10.21233/82xk-w954 |
| Kelly-Dudley Lake | 14537 | 44.35 | -93.37 | 44.35 | 320 | Umbanhowar, Charles E., Jr.. Kelly-Dudley Lake | 10.21233/4fsm-w415 |
| Martha Lake | 14539 | 45.14 | -93.74 | 45.14 | 296 | Umbanhowar, Charles E., Jr.. Martha Lake | 10.21233/zcrn-2h47 |
| Alpine Pond | 14547 | 37.64 | -112.82 | 37.64 | 3200 | Anderson, R. Scott; Hasbargen, Jim. Alpine Pond | 10.21233/50r6-tb57 |
| Lowder Creek Bog | 14549 | 37.67 | -112.79 | 37.67 | 3127 | Anderson, R. Scott; Hasbargen, Jim. Lowder Creek Bog | 10.21233/2q3p-8t07 |
| Bates Marsh | 14614 | 42.34 | -81.84 | 42.34 | 175 | Finkelstein, Sarah A.. Bates Marsh | 10.21233/a7se-2c50 |
| Big Reed Pond Hollow | 14624 | 46.35 | -69.05 | 46.35 | 370 | Schauffler, Molly. Big Reed Pond Hollow | 10.21233/dpjk-nw36 |
| Minnreg | 14626 | 44.69 | -93.32 | 44.69 | 297 | Umbanhowar, Charles E., Jr.. Minnreg | 10.21233/j36k-8t44 |
| Amber Lake | 14631 | 43.61 | -94.47 | 43.61 | 351 | Umbanhowar, Charles E., Jr.. Amber Lake | 10.21233/8n1y-1h53 |
| Camp Lake | 14633 | 45.16 | -94.09 | 45.16 | 315 | Umbanhowar, Charles E., Jr.. Camp Lake | 10.21233/x35d-q248 |
| Crystal Lake | 14635 | 44.33 | -93.21 | 44.33 | 351 | Umbanhowar, Charles E., Jr.. Crystal Lake | 10.21233/e00p-4q45 |
| Fish Lake | 14637 | 44.23 | -93.67 | 44.23 | 312 | Umbanhowar, Charles E., Jr.. Fish Lake | 10.21233/nc0w-mk91 |
| Fish Lake (Sc) | 14639 | 44.65 | -93.46 | 44.65 | 288 | Umbanhowar, Charles E., Jr.. Fish Lake (Sc) | 10.21233/27j0-4960 |
| Eagle Lake | 14641 | 44.81 | -93.93 | 44.81 | 296 | Umbanhowar, Charles E., Jr.. Eagle Lake | 10.21233/tmdc-mj73 |
| Lake Emily, Northeast Basin | 14643 | 44.31 | -93.91 | 44.31 | 296 | Umbanhowar, Charles E., Jr.. Lake Emily, Northeast Basin | 10.21233/mhdv-6n63 |
| Fuller Lake | 14645 | 45.42 | -94.08 | 45.42 | 290 | Umbanhowar, Charles E., Jr.. Fuller Lake | 10.21233/j0zd-6071 |
| San Luis Lake | 14650 | 37.68 | -105.72 | 37.68 | 2293 | De Lanois, Jeanne L.. San Luis Lake | 10.21233/rg17-hr80 |
| Blackwoods Hollow | 14674 | 44.31 | -68.22 | 44.31 | 30 | Jacobson, G.; Schauffler, Molly. Blackwoods Hollow | 10.21233/65ar-gd68 |
| Buckley Pond Hollow | 14676 | 46.33 | -69.05 | 46.33 | 360 | Jacobson, G.; Schauffler, Molly. Buckley Pond Hollow | 10.21233/te1p-he56 |
| Isle au Haut North Hollow | 14678 | 44.07 | -68.64 | 44.07 | 75 | Jacobson, G.; Schauffler, Molly. Isle au Haut North Hollow | 10.21233/8bnm-7r08 |
| Isle au Haut South Hollow | 14680 | 44.03 | -68.63 | 44.03 | 65 | Jacobson, G.; Schauffler, Molly. Isle au Haut South Hollow | 10.21233/6ans-w752 |
| Roque Island Hollow | 14682 | 44.57 | -67.53 | 44.57 | 20 | Jacobson, G.; Schauffler, Molly. Roque Island Hollow | 10.21233/6hga-6436 |
| Schoodic Peninsula Hollow | 14684 | 44.37 | -68.07 | 44.37 | 10 | Jacobson, G.; Schauffler, Molly. Schoodic Peninsula Hollow | 10.21233/azmm-9650 |
| Conroy Lake | 14768 | 46.28 | -67.88 | 46.28 | 137 | Doner, Lisa A.. Conroy Lake | 10.21233/ptjw-d867 |
| Yahoo Lake | 14792 | 47.68 | -124.02 | 47.68 | 709 | Greenwald, D. Noah. Yahoo Lake | 10.21233/yzwy-0p89 |
| Two Frog Lake | 14794 | 51.11 | -127.53 | 51.11 | 4 | Galloway, Jennifer. Two Frog Lake | 10.21233/314t-a768 |
| South Bog | 14797 | 44.72 | -67.2 | 44.72 | 35 | Dieffenbacher-Krall, Ann C.. South Bog | 10.21233/2xrb-wn37 |
| Siesta Lake | 14799 | 37.85 | -119.66 | 37.85 | 2430 | Brunelle, Andrea R.. Siesta Lake | 10.21233/zhp9-cm48 |
| Burnt Knob Lake | 14803 | 45.71 | -114.98 | 45.71 | 2250 | Brunelle, Andrea R.. Burnt Knob Lake | 10.21233/ve01-y167 |
| Lake Mina | 14839 | 45.89 | -95.48 | 45.89 | 415 | St. Jacques, Jeannine-Marie. Lake Mina | 10.21233/7n5f-c524 |
| Baker Lake | 14884 | 45.89 | -114.26 | 45.89 | 2300 | Brunelle, Andrea R.. Baker Lake | 10.21233/gpa8-an56 |
| Tower Lake | 14889 | 46.54 | -86.04 | 46.54 | 261 | Andersen, Jennifer Jewell; Booth, Robert K.; Jackson, Stephen T.; Jones, Rachel A.; Minckley, Thomas A.; Reeves, Kelly. Tower Lake | 10.21233/c69e-2m65 |
| Deuce Lake | 14891 | 64.86 | -147.94 | 64.86 | 170 | Edwards, Mary E.; Finney, Bruce P.. Deuce Lake | 10.21233/7j5t-5w63 |
| Hoodoo Lake | 14911 | 46.32 | -114.65 | 46.32 | 1787 | Brunelle, Andrea R.. Hoodoo Lake | 10.21233/5drb-1282 |
| Pintler Lake | 14923 | 45.84 | -113.44 | 45.84 | 1921 | Brunelle, Andrea R.. Pintler Lake | 10.21233/av5q-6587 |
| Upper Soper Lake | 14925 | 62.91 | -69.88 | 62.91 | 0 | Doner, Lisa A.. Upper Soper Lake | 10.21233/ydnc-0495 |
| Prien Lake | 14928 | 30.19 | -93.28 | 30.19 | 0 | Fearn, Miriam L.. Prien Lake | 10.21233/pps9-sn76 |
| Ogac Lake | 14930 | 62.85 | -67.34 | 62.85 | 5 | Doner, Lisa A.. Ogac Lake | 10.21233/ptx4-dz18 |
| Nelson Lake | 14933 | 46.23 | -85.38 | 46.23 | 251 | Delcourt, Paul A.. Nelson Lake | 10.21233/arn2-5250 |
| Moose Lake | 14935 | 47.88 | -123.35 | 47.88 | 1544 | Gavin, Daniel G.. Moose Lake | 10.21233/qamn-c462 |
| Martins Lake | 14938 | 47.71 | -123.53 | 47.71 | 1415 | Gavin, Daniel G.. Martins Lake | 10.21233/54cn-0794 |
| Fracas Lake | 14944 | 36.63 | -112.24 | 36.63 | 2512 | Weng, Chengyu. Fracas Lake | 10.21233/ym56-bk43 |
| Efstadalsvatn | 14946 | 65.94 | -22.67 | 65.94 | 123 | Doner, Lisa A.. Efstadalsvatn | 10.21233/f630-mb35 |
| Dye Lower Water Lake (Dyer Lake) | 14948 | 66.62 | -61.65 | 66.62 | 323 | Miller, Gifford H.. Dye Lower Water Lake (Dyer Lake) | 10.21233/414e-k787 |
| Bear Lake | 14951 | 36.37 | -112.15 | 36.37 | 2778 | Weng, Chengyu. Bear Lake | 10.21233/636g-9n86 |
| Lake Arthur | 14953 | 30.05 | -92.71 | 30.05 | 1 | Fearn, Miriam L.. Lake Arthur | 10.21233/tvmt-5g85 |
| Lake Arthur | 14955 | 30.05 | -92.71 | 30.05 | 1 | Fearn, Miriam L.. Lake Arthur | 10.21233/vcma-8k37 |
| Appleman Lake | 14957 | 41.62 | -85.21 | 41.62 | 294 | Gill, Jacquelyn L.; Williams, John W.. Appleman Lake | 10.21233/59wz-qx78 |
| Lake Louise | 14991 | 49.03 | -97.23 | 49.03 | 240 | Grenier, A.. Lake Louise | 10.21233/nr5t-dm71 |
| Meade River bluff | 14995 | 70.48 | -157.34 | 70.48 | 2 | Eisner, Wendy R.. Meade River bluff | 10.21233/7jqq-6h03 |
| Round Pond | 14997 | 41.97 | -70.01 | 41.97 | 4 | Boose, Emery R.. Round Pond | 10.21233/m1ty-fz61 |
| Deep Pond | 14999 | 41.74 | -69.99 | 41.74 | 23 | Faison, Edward K.; Foster, David R.; Hansen, Barbara C. S.. Deep Pond | 10.21233/n8dz-y640 |
| Icehouse Pond | 15003 | 41.8 | -69.96 | 41.8 | 19 | Boose, Emery R.. Icehouse Pond | 10.21233/48nv-1h83 |
| Eagle Pond | 15007 | 41.7 | -70.14 | 41.7 | 11 | Boose, Emery R.; Faison, Edward K.; Foster, David R.; Hansen, Barbara C. S.. Eagle Pond | 10.21233/ar0p-hj05 |
| Jemima Pond | 15009 | 41.83 | -69.98 | 41.83 | 3 | Boose, Emery R.. Jemima Pond | 10.21233/rhs1-wt07 |
| Sandy Hill Pond | 15020 | 41.69 | -70.36 | 41.69 | 16 | Boose, Emery R.. Sandy Hill Pond | 10.21233/rgvz-gj38 |
| Fresh Pond | 15022 | 41.59 | -70.53 | 41.59 | 7 | Boose, Emery R.. Fresh Pond | 10.21233/w03f-sr85 |
| Mud Lake (Ho) | 15032 | 47.13 | -88.32 | 47.13 | 189 | Booth, Robert K.. Mud Lake (Ho) | 10.21233/gw2b-x179 |
| Lily Lake | 15035 | 47.91 | -89.09 | 47.91 | 301 | Flakne, Robyn A.. Lily Lake | 10.21233/4k5g-jx08 |
| Mumbo Lake | 15074 | 41.19 | -122.51 | 41.19 | 1860 | Daniels, Mark L.. Mumbo Lake | 10.21233/hwnh-8509 |
| Anderson Pond | 15088 | 36.03 | -85.5 | 36.03 | 303 | Andersen, Jennifer Jewell; Jackson, Stephen T.; Williams, John W.. Anderson Pond | 10.21233/mce3-kp31 |
| Lake Emma | 15106 | 37.9 | -107.62 | 37.9 | 3740 | Mode, William N.. Lake Emma | 10.21233/bhxy-pk21 |
| Devils Lake, Creel Bay | 15136 | 48.09 | -98.93 | 48.09 | 443 | Almquist, Heather R.. Devils Lake, Creel Bay | 10.21233/ffzs-p571 |
| Jones Lake | 15138 | 49.45 | -99.29 | 49.45 | 409 | Teed, Rebecca E.. Jones Lake | 10.21233/x1ts-qh05 |
| Mallard Pond | 15140 | 51.29 | -101.32 | 51.29 | 568 | Teed, Rebecca E.. Mallard Pond | 10.21233/52qv-3g19 |
| Makepeace Cedar Swamp | 15142 | 41.94 | -70.76 | 41.94 | 40 | Newby, Paige E.. Makepeace Cedar Swamp | 10.21233/fhxr-x596 |
| Makepeace Cedar Swamp | 15146 | 41.94 | -70.76 | 41.94 | 40 | Newby, Paige E.. Makepeace Cedar Swamp | 10.21233/c3aa-h411 |
| Makepeace Cedar Swamp | 15148 | 41.94 | -70.76 | 41.94 | 40 | Newby, Paige E.. Makepeace Cedar Swamp | 10.21233/h3vj-8d15 |
| Wendel site | 15153 | 46.43 | -98.29 | 46.43 | 423 | Yansa, Catherine H.. Wendel site | 10.21233/7j16-cj20 |
| Code Lake | 15157 | 67.16 | -151.86 | 67.16 | 250 | Higuera, Philip E.. Code Lake | 10.21233/htpm-ac79 |
| Elk Lake | 15167 | 47.19 | -95.22 | 47.19 | 448 | Almendinger, John C.; Cushing, Edward J., Jr.. Elk Lake | 10.21233/2s9m-j319 |
| Elk Lake | 15168 | 47.19 | -95.22 | 47.19 | 448 | Almendinger, John C.; Cushing, Edward J., Jr.. Elk Lake | 10.21233/rjet-kr95 |
| Elk Lake | 15169 | 47.19 | -95.22 | 47.19 | 448 | Almendinger, John C.; Cushing, Edward J., Jr.. Elk Lake | 10.21233/9btj-nv31 |
| Last Chance Lake | 15175 | 67.12 | -150.75 | 67.12 | 250 | Higuera, Philip E.. Last Chance Lake | 10.21233/9wfb-c822 |
| Kinsman Pond | 1518 | 44.13 | -71.73 | 44.13 | 1140 | Spear, Ray W.. Kinsman Pond | 10.21233/n3f159 |
| Ruppert Lake | 15185 | 67.07 | -154.24 | 67.07 | 230 | Higuera, Philip E.. Ruppert Lake | 10.21233/kkjd-pf71 |
| Wild Tussock Lake | 15187 | 67.13 | -151.38 | 67.13 | 290 | Higuera, Philip E.. Wild Tussock Lake | 10.21233/d4xx-zn44 |
| Xindi Lake | 15189 | 67.11 | -152.49 | 67.11 | 240 | Anderson, Patricia M.; Higuera, Philip E.. Xindi Lake | 10.21233/efy3-6z86 |
| Fort Bragg (core PAW2) | 15191 | 35.17 | -79.09 | 35.17 | 54 | Goman, Michelle. Fort Bragg (core PAW2) | 10.21233/5aes-5y61 |
| Laguna Pompal | 15197 | 18.38 | -94.96 | 18.38 | 730 | Goman, Michelle. Laguna Pompal | 10.21233/z377-nz81 |
| South Dansville Buried Peat | 15199 | 42.49 | -77.64 | 42.49 | 572 | Rynders, Theodore S.. South Dansville Buried Peat | 10.21233/qq5t-d646 |
| Kirchner Marsh | 1520 | 44.77 | -93.12 | 44.77 | 286 | Wright, Herbert E., Jr.. Kirchner Marsh | 10.21233/n39b21 |
| Lost Park | 15201 | 39.29 | -105.54 | 39.29 | 3079 | Vierling, Lee A.. Lost Park | 10.21233/3pkd-8685 |
| Crawford Bog | 15203 | 43.47 | -79.95 | 43.47 | 268 | McAndrews, John H.. Crawford Bog | 10.21233/80xm-kh89 |
| Chesapeake Bay (MD99-2207) | 15205 | 38.03 | -76.21 | 38.03 | 0 | Willard, Debra A.. Chesapeake Bay (MD99-2207) | 10.21233/yw2g-1t26 |
| Chesapeake Bay (MD99-2208) | 15207 | 38.54 | -76.49 | 38.54 | 0 | Willard, Debra A.. Chesapeake Bay (MD99-2208) | 10.21233/0rm4-f986 |
| Chesapeake Bay (MD99-2209) | 15209 | 38.89 | -76.39 | 38.89 | 0 | Willard, Debra A.. Chesapeake Bay (MD99-2209) | 10.21233/yjhg-b425 |
| Chesapeake Bay (PTMC3-2) | 15211 | 38.03 | -76.22 | 38.03 | 0 | Willard, Debra A.. Chesapeake Bay (PTMC3-2) | 10.21233/0hkg-af34 |
| Big Lake | 15214 | 51.67 | -121.45 | 51.67 | 1029 | Chiu, Marian; Cumming, Brian F.; Smol, John P.; Szeicz, Julian M.. Big Lake | 10.21233/w5rw-qd24 |
| Titaluk River Exposure 1 | 15216 | 69.71 | -155.21 | 69.71 | 80 | Nelson, Robert E.. Titaluk River Exposure 1 | 10.21233/wbbq-yh19 |
| Titaluk River Exposure 2 | 15218 | 69.71 | -155.21 | 69.71 | 80 | Nelson, Robert E.. Titaluk River Exposure 2 | 10.21233/npbm-hz16 |
| Elk Lake | 15219 | 47.19 | -95.22 | 47.19 | 448 | Birks, Hilary H.. Elk Lake | 10.21233/2e34-1n86 |
| Caddo Creek (Core 1) | 15221 | 32.04 | -95.51 | 32.04 | 101 | Albert, Bruce M.. Caddo Creek (Core 1) | 10.21233/f3va-hs11 |
| St. Clair Lake | 15228 | 46.8 | -95.88 | 46.8 | 407 | Birks, Hilary H.. St. Clair Lake | 10.21233/f8ty-3180 |
| Kirk Lake | 1523 | 48.23 | -121.62 | 48.23 | 190 | Cwynar, Les C.. Kirk Lake | 10.21233/n3b07s |
| Eagle Lake | 15232 | 51.04 | -118.15 | 51.04 | 1845 | Mathewes, Rolf W.; Rosenberg, Sandra M.. Eagle Lake | 10.21233/gye2-a387 |
| Kitchner Lake | 1524 | 45.67 | -87.46 | 45.67 | 237 | Davis, Margaret B.; Woods, Kerry D.. Kitchner Lake | 10.21233/n36633 |
| Cowles Bog | 15242 | 41.64 | -87.09 | 41.64 | 184 | Futyma, Richard. Cowles Bog | 10.21233/m16f-gh96 |
| Pinhook Bog | 15244 | 41.61 | -86.85 | 41.61 | 243 | Futyma, Richard. Pinhook Bog | 10.21233/xyf7-9v15 |
| George (BE) | 15245 | 44.23 | -93.87 | 44.23 | 300 | Cushing, Edward J., Jr.; Hansen, Barbara C. S.. George (BE) | 10.21233/6cbs-aj07 |
| Albert Lea Lake | 15248 | 43.65 | -93.28 | 43.65 | 369 | Shane, Linda C. K.. Albert Lea Lake | 10.21233/74cn-vr82 |
| Ozawindib Lake | 15252 | 47.23 | -95.27 | 47.23 | 473 | Patterson, William Albert, III. Ozawindib Lake | 10.21233/bjc8-k375 |
| Little Horseshoe Lake | 15254 | 45.59 | -93.07 | 45.59 | 281 | Cushing, Edward J., Jr.. Little Horseshoe Lake | 10.21233/qpev-h604 |
| Cora Lake | 15256 | 46.17 | -95.32 | 46.17 | 586 | Cushing, Edward J., Jr.. Cora Lake | 10.21233/1dz5-4b26 |
| Miller Woods Pond 21 | 15261 | 41.61 | -87.27 | 41.61 | 181 | Futyma, Richard. Miller Woods Pond 21 | 10.21233/nd2p-wn88 |
| Miller Woods Pond 32 | 15263 | 41.61 | -87.28 | 41.61 | 182 | Futyma, Richard. Miller Woods Pond 32 | 10.21233/jacc-6w10 |
| Miller Woods Pond 44 | 15265 | 41.6 | -87.29 | 41.6 | 182 | Futyma, Richard. Miller Woods Pond 44 | 10.21233/nfyp-w463 |
| Tamarack Lake | 15266 | 44.87 | -93.63 | 44.87 | 294 | Waddington, Jean Constance Bassett. Tamarack Lake | 10.21233/ymmy-yf03 |
| Miller Woods Pond 51 | 15268 | 41.6 | -87.29 | 41.6 | 186 | Futyma, Richard. Miller Woods Pond 51 | 10.21233/29ex-nr29 |
| Elk Lake | 15269 | 47.19 | -95.22 | 47.19 | 448 | Waddington, Jean Constance Bassett. Elk Lake | 10.21233/64e5-mn62 |
| LaSalle Lake | 15270 | 47.34 | -95.17 | 47.34 | 422 | Waddington, Jean Constance Bassett. LaSalle Lake | 10.21233/pkjf-ph50 |
| Gaff Lake | 15272 | 49.47 | -109.67 | 49.47 | 1048 | Porter, Stephen C.; Vetter, Mary A.. Gaff Lake | 10.21233/t1me-b126 |
| Saint Olaf Lake | 15273 | 43.9 | -93.42 | 43.9 | 366 | Cushing, Edward J., Jr.. Saint Olaf Lake | 10.21233/ksyv-2t36 |
| Jones Lake | 15274 | 45.43 | -93.98 | 45.43 | 293 | McAndrews, John H.. Jones Lake | 10.21233/f6z4-gv71 |
| Cassiope Pond | 15276 | 50.17 | -127.75 | 50.17 | 550 | Hebda, Richard J.. Cassiope Pond | 10.21233/vmxy-3004 |
| Williams Lake | 15281 | 46.95 | -94.67 | 46.95 | 421 | Locke, Sharon M.. Williams Lake | 10.21233/p1k4-x328 |
| Winton Bay Lake | 15282 | 63.39 | -64.68 | 63.39 | 0 | Doner, Lisa A.. Winton Bay Lake | 10.21233/swpq-ye07 |
| Tiny Lake | 15284 | 51.19 | -127.38 | 51.19 | 6 | Galloway, Jennifer. Tiny Lake | 10.21233/s3ma-a925 |
| West Hawk Lake | 15286 | 49.76 | -95.19 | 49.76 | 330 | Boyd, Matthew. West Hawk Lake | 10.21233/ad64-ks29 |
| Pyrola Lake | 15288 | 50.18 | -127.7 | 50.18 | 506 | Hebda, Richard J.. Pyrola Lake | 10.21233/g6vy-4j29 |
| Byron-Bergen Swamp (Site 2) | 15292 | 43.1 | -78 | 43.1 | 180 | Futyma, Richard; Miller, Norton G.. Byron-Bergen Swamp (Site 2) | 10.21233/3p7k-v248 |
| Long Lake | 15294 | 44.99 | -93.56 | 44.99 | 288 | Shane, Linda C. K.. Long Lake | 10.21233/r0cq-9083 |
| Byron-Bergen Swamp (Site 1) | 15296 | 43.1 | -78.01 | 43.1 | 180 | Futyma, Richard; Miller, Norton G.. Byron-Bergen Swamp (Site 1) | 10.21233/pck3-ct03 |
| Emrick Lake | 15302 | 43.8 | -89.59 | 43.8 | 270 | Spigel, Kevin M.. Emrick Lake | 10.21233/hpc1-5c65 |
| East Soldier Lake | 15309 | 46.35 | -84.86 | 46.35 | 272 | Futyma, Richard. East Soldier Lake | 10.21233/0ywb-hk24 |
| Guard Lake | 15311 | 46.13 | -84.78 | 46.13 | 254 | Futyma, Richard. Guard Lake | 10.21233/rh0v-xq81 |
| Trout Lake Bog | 15316 | 46.2 | -85.02 | 46.2 | 259 | Futyma, Richard. Trout Lake Bog | 10.21233/hj3j-xh10 |
| Wolsfeld Woods Marsh | 15318 | 45 | -93.57 | 45 | 305 | Grimm, Eric Christopher. Wolsfeld Woods Marsh | 10.21233/qcy7-jv55 |
| Berendon Fen | 15323 | 56.24 | -130.06 | 56.24 | 794 | Mathewes, Rolf W.. Berendon Fen | 10.21233/txns-sv58 |
| Black Gum Swamp | 15325 | 42.54 | -72.18 | 42.54 | 358 | Foster, David R.; Zebryk, Tad Martin. Black Gum Swamp | 10.21233/rb6f-1g25 |
| Black Gum Swamp | 15327 | 42.54 | -72.18 | 42.54 | 358 | Lindbladh, Matts. Black Gum Swamp | 10.21233/h9hp-vp69 |
| Two Horsemen Pond | 15333 | 60.85 | -135.77 | 60.85 | 673 | Keenan, Timothy J.. Two Horsemen Pond | 10.21233/82zh-yc91 |
| Skinny Lake | 15342 | 57.59 | -130.1 | 57.59 | 899 | Mazzucchi, David; Spooner, Ian S.. Skinny Lake | 10.21233/pyjt-xa38 |
| Balsam Lake | 15350 | 42.03 | -74.6 | 42.03 | 762 | Ibe, Ralph .A.. Balsam Lake | 10.21233/kph1-ps34 |
| Maple Lake | 15353 | 41.94 | -74.76 | 41.94 | 637 | Ibe, Ralph .A.. Maple Lake | 10.21233/ppt3-2075 |
| South Lake | 15354 | 42.2 | -74.05 | 42.2 | 652 | Ibe, Ralph .A.. South Lake | 10.21233/1ve3-yh61 |
| Stewart Bog | 15356 | 35.83 | -105.72 | 35.83 | 3115 | Jiménez-Moreno, Gonzalo. Stewart Bog | 10.21233/41a2-9620 |
| Spillway Pond | 15359 | 56.24 | -130.07 | 56.24 | 852 | Mathewes, Rolf W.. Spillway Pond | 10.21233/1t37-sc11 |
| Blue Lake Wetlands | 15368 | 40.5 | -114.03 | 40.5 | 1297 | Louderback, Lisbeth A.. Blue Lake Wetlands | 10.21233/rc8q-je06 |
| Dunbar Lake [Big Fish Lake] | 15369 | 50.79 | -116.39 | 50.79 | 1116 | Hazell, Stephen. Dunbar Lake [Big Fish Lake] | 10.21233/qb1m-ta49 |
| Ridge and Slough (02-05-20-13) | 15371 | 26.1 | -80.74 | 26.1 | 2 | Bernhardt, Christopher E.. Ridge and Slough (02-05-20-13) | 10.21233/pn5c-9x40 |
| Ridge and Slough (02-05-20-14) | 15377 | 26.1 | -80.74 | 26.1 | 2 | Bernhardt, Christopher E.. Ridge and Slough (02-05-20-14) | 10.21233/qhtr-fk23 |
| Ridge and Slough (02-05-21-2) | 15379 | 25.83 | -80.77 | 25.83 | 1 | Bernhardt, Christopher E.. Ridge and Slough (02-05-21-2) | 10.21233/m06f-by70 |
| Ridge and Slough (02-05-21-4) | 15381 | 25.83 | -80.77 | 25.83 | 1 | Bernhardt, Christopher E.. Ridge and Slough (02-05-21-4) | 10.21233/ss13-7n86 |
| Ridge and Slough (02-05-21-5) | 15383 | 25.83 | -80.77 | 25.83 | 1 | Bernhardt, Christopher E.. Ridge and Slough (02-05-21-5) | 10.21233/3pbp-d740 |
| Flycatcher Basin | 15385 | 41.02 | -121.57 | 41.02 | 924 | Anderson, R. Scott. Flycatcher Basin | 10.21233/wy8b-3e83 |
| Fog Lake | 15392 | 67.18 | -63.25 | 67.18 | 422 | Frechette, Bianca. Fog Lake | 10.21233/bqja-m092 |
| Las Flores Arroyo | 15396 | 33.29 | -117.46 | 33.29 | 6 | Anderson, R. Scott. Las Flores Arroyo | 10.21233/ctpk-r067 |
| Long Last Lake | 15399 | 61.56 | -137.23 | 61.56 | 985 | Keenan, Timothy J.. Long Last Lake | 10.21233/fbm9-6394 |
| Deep Lake | 15403 | 47.68 | -95.4 | 47.68 | 410 | Hu, Feng Sheng; Wright, Herbert E., Jr.. Deep Lake | 10.21233/vds5-pf58 |
| Jan Lake | 15406 | 63.56 | -143.92 | 63.56 | 503 | Carlson, Lisa J.. Jan Lake | 10.21233/xstm-aq61 |
| Nichols Meadow | 15408 | 37.42 | -119.58 | 37.42 | 1515 | Koehler, Peter A.. Nichols Meadow | 10.21233/502z-2a36 |
| Kollioksak | 1541 | 66.97 | -156.45 | 66.97 | 213 | Anderson, Patricia M.. Kollioksak | 10.21233/n3805d |
| Paradox Lake | 15413 | 60.62 | -150.76 | 60.62 | 81 | Anderson, R. Scott. Paradox Lake | 10.21233/8q9d-e745 |
| Cootes Paradise Marsh | 15415 | 43.28 | -79.91 | 43.28 | 72 | Davis, Anthony M.; Peros, Matthew C.. Cootes Paradise Marsh | 10.21233/na70-nc19 |
| Rasberry Bog | 15417 | 57.48 | -130.83 | 57.48 | 802 | Mathewes, Rolf W.. Rasberry Bog | 10.21233/hkn5-4a59 |
| Pyramid Lake | 15420 | 58.89 | -129.83 | 58.89 | 1439 | Mazzucchi, David. Pyramid Lake | 10.21233/1ca9-2k79 |
| Twin Lake | 15426 | 49.32 | -119.72 | 49.32 | 800 | Cawker, Kenneth B.. Twin Lake | 10.21233/znja-qh06 |
| Adventure Lake | 15460 | 46.09 | -91.94 | 46.09 | 302 | Calcote, Randy. Adventure Lake | 10.21233/mxvn-gf51 |
| Bass Pond | 15462 | 50.72 | -57.37 | 50.72 | 8 | Macpherson, Joyce B.. Bass Pond | 10.21233/tadv-5c57 |
| Benach Lake | 15463 | 45.93 | -92.26 | 45.93 | 297 | Calcote, Randy. Benach Lake | 10.21233/sz8e-1x96 |
| BlueJ Lake | 15477 | 46.41 | -91.53 | 46.41 | 355 | Calcote, Randy. BlueJ Lake | 10.21233/7y4d-y844 |
| Brozie Lake | 15478 | 45.96 | -92.11 | 45.96 | 303 | Calcote, Randy. Brozie Lake | 10.21233/0qxj-k390 |
| Camp Two Lake | 15479 | 46.5 | -91.41 | 46.5 | 346 | Calcote, Randy; Lynch, Elizabeth A.. Camp Two Lake | 10.21233/ca48-yc68 |
| Kotiranta Lake | 1548 | 46.71 | -92.59 | 46.71 | 369 | Wright, Herbert E., Jr.. Kotiranta Lake | 10.21233/n3bs83 |
| Cowden Lake | 15487 | 43.36 | -85.36 | 43.36 | 279 | Hupy, Christina M.; Yansa, Catherine H.. Cowden Lake | 10.21233/2s88-n175 |
| Ferry Lake | 15489 | 46.01 | -92.12 | 46.01 | 290 | Calcote, Randy; Hotchkiss, Sara C.; Lynch, Elizabeth A.. Ferry Lake | 10.21233/k4wy-0k33 |
| Hicks Lake | 15492 | 44.02 | -85.28 | 44.02 | 379 | Hupy, Christina M.; Yansa, Catherine H.. Hicks Lake | 10.21233/ajqc-2p38 |
| Hual Cu Cuish Meadow | 15494 | 32.97 | -116.58 | 32.97 | 1451 | Wahl, Eugene Richard. Hual Cu Cuish Meadow | 10.21233/626e-7k44 |
| Little Green Valley Meadow | 15506 | 34.23 | -117.05 | 34.23 | 2225 | Wahl, Eugene Richard. Little Green Valley Meadow | 10.21233/fxex-5q25 |
| Morrison Lake | 15511 | 42.86 | -85.21 | 42.86 | 246 | Hupy, Christina M.; Yansa, Catherine H.. Morrison Lake | 10.21233/sk02-jh34 |
| Kryzewinski Lake | 1552 | 46.35 | -92.87 | 46.35 | NA | McAndrews, John H.. Kryzewinski Lake | 10.21233/n3dx6b |
| Chalmer's Bog (PL-78-37) | 15564 | 50.65 | -114.54 | 50.65 | 1360 | Mott, Robert J.. Chalmer's Bog (PL-78-37) | 10.21233/hxx1-wd04 |
| Van Wyck | 15580 | 44.52 | -116.15 | 44.52 | 2255 | Doerner, James P.. Van Wyck | 10.21233/51kp-1e53 |
| McCall Fen | 15586 | 44.93 | -116.05 | 44.93 | 1615 | Doerner, James P.. McCall Fen | 10.21233/108x-ge80 |
| Devil's Bathtub | 15588 | 43.02 | -77.57 | 43.02 | 198 | Clark, James S.. Devil's Bathtub | 10.21233/d06n-bw32 |
| Skunk Cabbage Meadow | 15591 | 33.77 | -116.67 | 33.77 | 2417 | Wahl, Eugene Richard. Skunk Cabbage Meadow | 10.21233/az3k-5181 |
| Taquitz Meadow | 15594 | 33.77 | -116.66 | 33.77 | 2405 | Wahl, Eugene Richard. Taquitz Meadow | 10.21233/x0c3-ed21 |
| Albany River Bog | 15597 | 51.44 | -83.62 | 51.44 | 79 | Glaser, Paul H.; Hansen, Barbara C. S.. Albany River Bog | 10.21233/jhh6-7q75 |
| Portage Lake | 15627 | 60.72 | -150.53 | 60.72 | 78 | Anderson, R. Scott; Lynch, Jason A.. Portage Lake | 10.21233/5m7p-q097 |
| Bear Lake | 15628 | 41.98 | -111.33 | 41.98 | 1810 | Anderson, R. Scott; Jiménez-Moreno, Gonzalo. Bear Lake | 10.21233/qm0e-tv75 |
| Belec Lake Bog | 15630 | 51.62 | -82.29 | 51.62 | 64 | Glaser, Paul H.; Hansen, Barbara C. S.. Belec Lake Bog | 10.21233/6j0s-ag87 |
| Oldman Bog | 15635 | 51.03 | -84.49 | 51.03 | 103 | Glaser, Paul H.; Hansen, Barbara C. S.. Oldman Bog | 10.21233/ny7s-f780 |
| Big Cypress (core 03-9-16-3) | 15637 | 25.7 | -80.87 | 25.7 | 1 | Bernhardt, Christopher E.; Willard, Debra A.. Big Cypress (core 03-9-16-3) | 10.21233/dm2v-y042 |
| Big Cypress (core 03-9-16-6) | 15639 | 25.7 | -80.87 | 25.7 | 1 | Bernhardt, Christopher E.; Willard, Debra A.. Big Cypress (core 03-9-16-6) | 10.21233/bmwr-e546 |
| Kylen Lake | 1564 | 47.35 | -91.8 | 47.35 | 485 | Birks, Harry John Betteley. Kylen Lake | 10.21233/n38w6r |
| Big Sandy Creek | 15641 | 32.55 | -95.16 | 32.55 | 80 | Albert, Bruce M.. Big Sandy Creek | 10.21233/bepp-gp08 |
| Bluff Lake | 15646 | 41.35 | -122.56 | 41.35 | 1926 | Mohr, Jerry A.. Bluff Lake | 10.21233/e0q4-t414 |
| Buck Lake | 15660 | 46.52 | -86.35 | 46.52 | 278 | Davis, Margaret B.. Buck Lake | 10.21233/zd0z-ve57 |
| Buckbean Bog | 15667 | 49.12 | -119.68 | 49.12 | 1803 | Heinrichs, Markus L.. Buckbean Bog | 10.21233/8k2x-tx03 |
| Lacawac | 1568 | 41.38 | -75.29 | 41.38 | 443 | Russell Southgate, Emily W. B.. Lacawac | 10.21233/n3bx5b |
| Bunker Lake | 15680 | 39.05 | -120.39 | 39.05 | 1995 | Edlund, Eric G.. Bunker Lake | 10.21233/rp2w-0753 |
| Canyon Lake | 15682 | 46.83 | -87.92 | 46.83 | 258 | Davis, Margaret B.. Canyon Lake | 10.21233/zpe5-s053 |
| Catahoula Lake (core CLR3) | 15684 | 31.51 | -92.13 | 31.51 | 12 | Tedford, Rebecca A.. Catahoula Lake (core CLR3) | 10.21233/z03j-qm15 |
| Lac Colin | 1569 | 46.72 | -70.3 | 46.72 | 658 | Mott, Robert J.. Lac Colin | 10.21233/n37744 |
| Catahoula Lake (core CLR3) | 15696 | 31.51 | -92.13 | 31.51 | 12 | Tedford, Rebecca A.. Catahoula Lake (core CLR3) | 10.21233/c6pe-5h03 |
| Lac Hamard | 1570 | 54.8 | -67.5 | 54.8 | 564 | Stravers, Loreen K. Stegeman. Lac Hamard | 10.21233/n33f1t |
| Clearwater Bog | 15700 | 54.02 | -101.26 | 54.02 | 266 | Nichols, Harvey. Clearwater Bog | 10.21233/7xwd-g592 |
| Lac Louis | 1571 | 47.29 | -79.12 | 47.29 | 300 | Vincent, Jean-Serge. Lac Louis | 10.21233/n3ck8b |
| Crater Lake | 15713 | 49.19 | -120.1 | 49.19 | 2101 | Heinrichs, Markus L.. Crater Lake | 10.21233/sn81-zc38 |
| Dead Horse Lake | 15715 | 42.56 | -120.78 | 42.56 | 2251 | Minckley, Thomas A.. Dead Horse Lake | 10.21233/zedd-cm35 |
| Donard Lake | 15719 | 66.66 | -61.79 | 66.66 | 424 | Miller, Gifford H.. Donard Lake | 10.21233/x7hq-ts05 |
| Lac à Magie | 1572 | 44.26 | -66.08 | 44.26 | 60 | Mayle, Frank. Lac à Magie | 10.21233/n37w7t |
| Dune Lake | 15724 | 64.42 | -149.9 | 64.42 | 134 | Lynch, Jason A.. Dune Lake | 10.21233/31ah-kk77 |
| Fire Lake | 15730 | 52.33 | -67.36 | 52.33 | 600 | Mott, Robert J.. Fire Lake | 10.21233/zakg-m595 |
| Goose Bay Marsh | 15732 | 44.35 | -75.87 | 44.35 | 75 | Farrell, John M.; Rippke, Molly Beland. Goose Bay Marsh | 10.21233/0wvv-hb57 |
| Grassy Lake | 15734 | 39.7 | -120.66 | 39.7 | 1921 | Edlund, Eric G.. Grassy Lake | 10.21233/6pqr-ch60 |
| Harris Lake | 15738 | 49.67 | -109.9 | 49.67 | 1230 | Sauchyn, David J.; Vetter, Mary A.. Harris Lake | 10.21233/fcvg-km58 |
| Ladd Lake | 1574 | 41.42 | -84.75 | 41.42 | 249 | Shane, Linda C. K.. Ladd Lake | 10.21233/n30d2x |
| Hemlock Lake | 15740 | 46.31 | -91.2 | 46.31 | 412 | Davis, Margaret B.. Hemlock Lake | 10.21233/6am1-sj67 |
| Joggins Section (MS-82-44) | 15744 | 44.39 | -64.7 | 44.39 | 6 | Mott, Robert J.. Joggins Section (MS-82-44) | 10.21233/zp3r-tn05 |
| Lake Jake | 15746 | 63.67 | -65.15 | 63.67 | 264 | Miller, Gifford H.. Lake Jake | 10.21233/pbbn-5h88 |
| Lake Shelby | 15750 | 30.26 | -87.66 | 30.26 | 0 | Fearn, Miriam L.; Liu, Kam-biu. Lake Shelby | 10.21233/8xyz-8886 |
| Lantz Site | 15752 | 44.98 | -63.49 | 44.98 | 15 | Mott, Robert J.. Lantz Site | 10.21233/bjqy-em56 |
| Laysan Island Lake | 15757 | 25.77 | -171.73 | 25.77 | 0 | Athens, J. Stephen. Laysan Island Lake | 10.21233/nswh-wx25 |
| Lily Lake | 15762 | 41.98 | -120.21 | 41.98 | 2047 | Minckley, Thomas A.. Lily Lake | 10.21233/gd2j-5k10 |
| Lily Pond | 15764 | 42.42 | -72.35 | 42.42 | 303 | Foster, David R.. Lily Pond | 10.21233/dfzy-sd04 |
| Lilypad Lake | 15766 | 36.98 | -118.99 | 36.98 | 1982 | Edlund, Eric G.. Lilypad Lake | 10.21233/vmwe-g130 |
| Lost Lake | 15768 | 45.82 | -123.58 | 45.82 | 452 | Long, Colin James. Lost Lake | 10.21233/5ct3-qj23 |
| Martens Slough (PL-77-20) | 15772 | 52.04 | -106.38 | 52.04 | 511 | Mott, Robert J.. Martens Slough (PL-77-20) | 10.21233/nre4-q408 |
| McMurray Lake | 15776 | 39.46 | -120.65 | 39.46 | 1778 | Edlund, Eric G.. McMurray Lake | 10.21233/hrkc-qm74 |
| Mono Lake | 15778 | 38.01 | -119.03 | 38.01 | 1945 | Davis, Owen K.. Mono Lake | 10.21233/ez69-yw85 |
| Moraine Bog | 15781 | 51.33 | -124.9 | 51.33 | 891 | Arsenault, Tracy A.. Moraine Bog | 10.21233/52yq-b228 |
| Moraine Lake | 15783 | 71.86 | -124.47 | 71.86 | 30 | Mott, Robert J.. Moraine Lake | 10.21233/6xsz-gv46 |
| Stewert Point Pond | 15785 | 72.35 | -120.22 | 72.35 | 220 | Mott, Robert J.. Stewert Point Pond | 10.21233/rp8s-2k53 |
| Caribou Lake (MS-74-15) | 15789 | 73.51 | -120.28 | 73.51 | 120 | Mott, Robert J.. Caribou Lake (MS-74-15) | 10.21233/jc66-m526 |
| Roulston Lake (MS-78-15) | 15793 | 46.89 | -67.4 | 46.89 | 151 | Mott, Robert J.. Roulston Lake (MS-78-15) | 10.21233/b6rr-8867 |
| Blomidon Section MS-89-16 | 15796 | 45.22 | -64.38 | 45.22 | 23 | Mott, Robert J.. Blomidon Section MS-89-16 | 10.21233/ze2y-2e90 |
| Lake Sixteen | 1580 | 45.6 | -84.32 | 45.6 | 216 | Futyma, Richard. Lake Sixteen | 10.21233/n36w7h |
| Lake 27 | 1581 | 45.07 | -84.78 | 45.07 | 411 | Bernabo, J. Christopher. Lake 27 | 10.21233/n33635 |
| Nutella Lake | 15811 | 63.05 | -147.39 | 63.05 | 931 | Rohr, Melanie. Nutella Lake | 10.21233/psnq-xv46 |
| Swampbuggy Lake | 15814 | 63.05 | -147.42 | 63.05 | 813 | Rohr, Melanie. Swampbuggy Lake | 10.21233/kxff-0a77 |
| Porcupine Mountain | 15819 | 52.51 | -101.63 | 52.51 | 640 | Nichols, Harvey. Porcupine Mountain | 10.21233/4vq0-4494 |
| Lake 31 | 1582 | 67.05 | -50.47 | 67.05 | 115 | Eisner, Wendy R.. Lake 31 | 10.21233/v98s-4073 |
| Prospect Hill II | 15820 | 42.56 | -72.18 | 42.56 | 300 | McLachlan, Jason S.. Prospect Hill II | 10.21233/hzge-6h36 |
| Prospect Hill VII | 15821 | 42.56 | -72.18 | 42.56 | 300 | McLachlan, Jason S.. Prospect Hill VII | 10.21233/5b96-db06 |
| Pascagoula Marsh | 15825 | 30.39 | -88.59 | 30.39 | 0 | Hathorn, Jennifer H.. Pascagoula Marsh | 10.21233/ttaf-pc16 |
| Rock Lake | 15827 | 60.45 | -150.25 | 60.45 | 236 | Bigelow, Nancy H.; Edwards, Mary E.; Lynch, Jason A.. Rock Lake | 10.21233/n18h-gt53 |
| Robinson Lake | 15829 | 63.4 | -64.26 | 63.4 | 170 | Miller, Gifford H.. Robinson Lake | 10.21233/mgv7-z770 |
| Sandy Run Creek | 15831 | 32.57 | -83.08 | 32.57 | 80 | LaMoreaux, Heidi K.. Sandy Run Creek | 10.21233/44v8-7p56 |
| Lake Ann | 1584 | 45.42 | -93.69 | 45.42 | 291 | McAndrews, John H.. Lake Ann | 10.21233/n3916f |
| Sheep Mountain Bog | 15855 | 46.95 | -113.79 | 46.95 | 1920 | Hemphill, Martha Lynn. Sheep Mountain Bog | 10.21233/5fb5-p537 |
| Slab City | 15856 | 42.51 | -72.18 | 42.51 | 270 | McLachlan, Jason S.. Slab City | 10.21233/q1c7-7r55 |
| Slab City | 15857 | 42.51 | -72.18 | 42.51 | 270 | McLachlan, Jason S.. Slab City | 10.21233/5nc7-jm95 |
| Lake B | 1586 | 53.8 | -106.08 | 53.8 | 553 | Mott, Robert J.. Lake B | 10.21233/n35734 |
| Swan Lake | 15864 | 28.04 | -97.17 | 28.04 | 0 | Albert, Bruce M.; Ricklis, Robert A.. Swan Lake | 10.21233/62ad-2r14 |
| Tannersville Bog | 15866 | 41.04 | -75.26 | 41.04 | 277 | Cai, Shanshan; Yu, Zicheng C.. Tannersville Bog | 10.21233/b9nq-n244 |
| Lake BN7 | 1587 | 55.01 | -73.52 | 55.01 | 395 | Gajewski, Konrad J.. Lake BN7 | 10.21233/n31h9x |
| Testalinden Lake | 15870 | 49.12 | -119.68 | 49.12 | 1807 | Heinrichs, Markus L.. Testalinden Lake | 10.21233/z0gg-ap52 |
| Top Lake | 15872 | 54.48 | -130.94 | 54.48 | 33 | McLaren, Duncan. Top Lake | 10.21233/7q6k-xg57 |
| Tulare Lake | 15876 | 36.05 | -119.78 | 36.05 | 55 | Davis, Owen K.. Tulare Lake | 10.21233/6fad-4339 |
| Tumalo Lake | 15878 | 44.02 | -121.54 | 44.02 | 1543 | Long, Colin James. Tumalo Lake | 10.21233/x1bk-ra92 |
| Lake Carlson | 1588 | 44.8 | -93.16 | 44.8 | 254 | Wright, Herbert E., Jr.. Lake Carlson | 10.21233/n39q02 |
| Warner Lake | 15882 | 46.12 | -92.04 | 46.12 | 304 | Tweiten, Michael A.. Warner Lake | 10.21233/vx1h-dj04 |
| Crystal Lake | 15886 | 42.23 | -88.36 | 42.23 | 273 | Gonzales, Leila M.; Grimm, Eric Christopher. Crystal Lake | 10.21233/56k5-ng15 |
| White Lake | 15892 | 41 | -74.91 | 41 | 138 | Yu, Zicheng C.. White Lake | 10.21233/k58q-9d96 |
| Lake CH2 | 1590 | 49.68 | -74.58 | 49.68 | 830 | Garralla, Silvina S.. Lake CH2 | 10.21233/n32647 |
| Divers Lake | 15904 | 43.04 | -78.4 | 43.04 | 239 | Futyma, Richard; Miller, Norton G.. Divers Lake | 10.21233/xqhj-c782 |
| Ballston Lake | 15909 | 42.95 | -73.85 | 42.95 | 76 | Toney, Jaime L.. Ballston Lake | 10.21233/rqzm-ma95 |
| Lake EC1 | 1591 | 56.28 | -75.1 | 56.28 | 250 | Gajewski, Konrad J.. Lake EC1 | 10.21233/n3hj06 |
| Kerr Lake | 15916 | 46.24 | -89.28 | 46.24 | 524 | Brugam, Richard Blair. Kerr Lake | 10.21233/yhcj-hb16 |
| Crooked Lake | 15919 | 46.25 | -89.29 | 46.25 | 519 | Brugam, Richard Blair. Crooked Lake | 10.21233/5zt0-g990 |
| Lake EC2 | 1592 | 56.02 | -74.94 | 56.02 | 300 | Gajewski, Konrad J.. Lake EC2 | 10.21233/n3cq8q |
| Jay Lake | 15922 | 46.23 | -89.28 | 46.23 | 544 | Ewing, Holly A.. Jay Lake | 10.21233/8thg-6w60 |
| Lake O' Pines | 15925 | 46.14 | -89.26 | 46.14 | 514 | Ewing, Holly A.. Lake O' Pines | 10.21233/fm9a-bm03 |
| Hiscock Site | 15929 | 43 | -78 | 43 | 189 | McAndrews, John H.. Hiscock Site | 10.21233/ad82-ja20 |
| Green Pond | 15931 | 42.57 | -72.51 | 42.57 | 80 | Foster, David R.. Green Pond | 10.21233/jmze-9037 |
| Lily Warwick | 15933 | 42.69 | -72.34 | 42.69 | 269 | Foster, David R.. Lily Warwick | 10.21233/zkg7-4840 |
| Little Mirror Lake | 15935 | 42.52 | -71.61 | 42.52 | 73 | Foster, David R.. Little Mirror Lake | 10.21233/gxny-ma10 |
| SRM-1 | 15939 | 25.35 | -81.11 | 25.35 | 0 | Yao, Qiang. SRM-1 | 10.21233/yhre-qg42 |
| Lake GB1 | 1594 | 55.11 | -75.25 | 55.11 | 325 | Gajewski, Konrad J.. Lake GB1 | 10.21233/n34746 |
| Otter Pond | 15942 | 42.65 | -72.53 | 42.65 | 107 | Foster, David R.. Otter Pond | 10.21233/enmq-kb54 |
| Silver Lake | 15944 | 42.6 | -72.23 | 42.6 | 161 | Foster, David R.. Silver Lake | 10.21233/6q36-sr27 |
| Larix laricina Site 4 | 15947 | 57.72 | -75.81 | 57.72 | 170 | Penalba, Maria Cristina. Larix laricina Site 4 | 10.21233/a6gw-a462 |
| Lake GB2 | 1595 | 56.1 | -75.28 | 56.1 | 300 | Gajewski, Konrad J.. Lake GB2 | 10.21233/n30h9m |
| Larix laricina Site 5 | 15950 | 57.72 | -75.81 | 57.72 | 170 | Payette, Serge; Penalba Garmendia, M. Cristina. Larix laricina Site 5 | 10.21233/xz5z-pr53 |
| Larix laricina Site 10 | 15952 | 57.85 | -72.78 | 57.85 | 280 | Payette, Serge; Penalba Garmendia, M. Cristina. Larix laricina Site 10 | 10.21233/bt73-3f31 |
| Qually Pond | 15965 | 47.68 | -96.2 | 47.68 | 354 | Shay, Creighton Thomas. Qually Pond | 10.21233/g2vy-8r87 |
| Stoneman Lake | 15967 | 34.78 | -111.52 | 34.78 | 2047 | Hasbargen, Jim. Stoneman Lake | 10.21233/0n3x-5g88 |
| Farewell Lake | 15970 | 62.56 | -153.65 | 62.56 | 320 | Hu, Feng Sheng. Farewell Lake | 10.21233/kq0a-zm89 |
| Grandfather Lake | 15976 | 59.8 | -158.54 | 59.8 | 142 | Hu, Feng Sheng. Grandfather Lake | 10.21233/ywkn-vk84 |
| Lake LB1 | 1598 | 57.92 | -75.62 | 57.92 | 200 | Gajewski, Konrad J.. Lake LB1 | 10.21233/n3164x |
| Ongivinuk Lake | 15980 | 59.57 | -159.36 | 59.57 | 163 | Hu, Feng Sheng. Ongivinuk Lake | 10.21233/n7fn-7s57 |
| Mayflower Lake | 15982 | 45.39 | -79.22 | 45.39 | 189 | Gold, Melissa; McAndrews, John H.. Mayflower Lake | 10.21233/r36e-4e49 |
| Itasca Bison Kill Site | 15985 | 47.19 | -95.23 | 47.19 | 447 | Shay, Creighton Thomas. Itasca Bison Kill Site | 10.21233/r32g-tx68 |
| Itasca Bison Kill Site | 15989 | 47.19 | -95.23 | 47.19 | 447 | Shay, Creighton Thomas. Itasca Bison Kill Site | 10.21233/rk2k-g050 |
| Lake LR1 | 1599 | 58.58 | -75.25 | 58.58 | 170 | Gajewski, Konrad J.. Lake LR1 | 10.21233/n3gh9z |
| Itasca Bison Kill Site | 15992 | 47.19 | -95.23 | 47.19 | 447 | Shay, Creighton Thomas. Itasca Bison Kill Site | 10.21233/e6hn-0h61 |
| Itasca Bison Kill Site | 15998 | 47.19 | -95.23 | 47.19 | 447 | Shay, Creighton Thomas. Itasca Bison Kill Site | 10.21233/xc2x-3x38 |
| Itasca Bison Kill Site | 16002 | 47.19 | -95.23 | 47.19 | 447 | Shay, Creighton Thomas. Itasca Bison Kill Site | 10.21233/epm5-7a33 |
| Pigeon Marsh | 16009 | 34.66 | -85.4 | 34.66 | 660 | Watts, William A.. Pigeon Marsh | 10.21233/5xje-xg37 |
| Lake LR3 | 1601 | 58.58 | -75.25 | 58.58 | 160 | Gajewski, Konrad J.. Lake LR3 | 10.21233/n3715f |
| Secret Valley Marsh | 16016 | 40.57 | -120.27 | 40.57 | 1359 | West, G. James. Secret Valley Marsh | 10.21233/vffp-x175 |
| Lake LT1 | 1603 | 58.14 | -75.15 | 58.14 | 150 | Gajewski, Konrad J.. Lake LT1 | 10.21233/n3ch2c |
| Lake PWWL | 1604 | 73.59 | -98.54 | 73.59 | 110 | Gajewski, Konrad J.. Lake PWWL | 10.21233/n37p9h |
| Lower Lake | 16046 | 38.59 | -123.3 | 38.59 | 228 | West, G. James. Lower Lake | 10.21233/c3ps-w968 |
| Little Willow Lake | 16054 | 40.41 | -121.39 | 40.41 | 1829 | West, G. James. Little Willow Lake | 10.21233/vqnc-sx41 |
| Lake QC | 1606 | 46.83 | -80.7 | 46.83 | 333 | McAndrews, John H.. Lake QC | 10.21233/n3064m |
| Cedar Lake | 16061 | 41.21 | -122.5 | 41.21 | 1737 | West, G. James. Cedar Lake | 10.21233/g17d-2n36 |
| Elkhorn Slough | 16063 | 36.83 | -121.76 | 36.83 | 0 | West, G. James. Elkhorn Slough | 10.21233/pfsb-bc85 |
| CA-HUM-558 (Pilot Ridge) | 16065 | 40.66 | -123.67 | 40.66 | 1250 | West, G. James. CA-HUM-558 (Pilot Ridge) | 10.21233/c49c-z514 |
| Preston Lake | 16069 | 38.85 | -123.02 | 38.85 | 264 | West, G. James. Preston Lake | 10.21233/ra1a-mq96 |
| Lake Six | 1607 | 48.4 | -81.32 | 48.4 | 305 | Liu, Kam-biu. Lake Six | 10.21233/n3fj0k |
| Taylor Marsh | 16071 | 38.94 | -120.06 | 38.94 | 1896 | West, G. James. Taylor Marsh | 10.21233/23wa-mr90 |
| Tule Lake | 16073 | 39.49 | -123.04 | 39.49 | 1340 | West, G. James. Tule Lake | 10.21233/s6jx-f115 |
| Grass Lake | 16075 | 41.65 | -122.17 | 41.65 | 1537 | Hakala, Katharine J.. Grass Lake | 10.21233/fvkb-9e77 |
| Bradshaw Lake peat section | 16077 | 57.76 | -95.19 | 57.76 | 215 | Mott, Robert J.. Bradshaw Lake peat section | 10.21233/7tmn-xr23 |
| Brier Island Bog MS-85-22 | 16079 | 44.26 | -66.37 | 44.26 | 15 | Mott, Robert J.. Brier Island Bog MS-85-22 | 10.21233/zh76-mx93 |
| Chance Harbour Lake | 16081 | 45.67 | -62.61 | 45.67 | 5 | Mott, Robert J.. Chance Harbour Lake | 10.21233/p7fp-g179 |
| Lost Moose Core 128 | 16083 | 57.56 | -94.27 | 57.56 | 110 | Mott, Robert J.. Lost Moose Core 128 | 10.21233/bt8w-b647 |
| Island Lake | 16086 | 47.83 | -66.18 | 47.83 | 264 | Mott, Robert J.. Island Lake | 10.21233/nrq0-e757 |
| Pye Lake | 16103 | 44.98 | -62.09 | 44.98 | 9 | Mott, Robert J.. Pye Lake | 10.21233/f5x5-y496 |
| Silcox Core 52 | 16105 | 57.21 | -94.18 | 57.21 | 135 | Mott, Robert J.. Silcox Core 52 | 10.21233/38ev-4529 |
| Thibaudeau | 16107 | 57.09 | -94.17 | 57.09 | 125 | Wang, X.C.. Thibaudeau | 10.21233/94pt-ya63 |
| Patricia Bay Lake | 16109 | 70.46 | -68.5 | 70.46 | 11 | Mode, William N.. Patricia Bay Lake | 10.21233/772k-7s80 |
| L'Anse aux Meadows Site | 1611 | 51.57 | -55.55 | 51.57 | 5 | McAndrews, John H.. L'Anse aux Meadows Site | 10.21233/n32b1g |
| Grays Lake | 16111 | 43.07 | -111.44 | 43.07 | 1195 | Beiswenger, Jane M.. Grays Lake | 10.21233/fvhw-s571 |
| Grays Lake | 16113 | 43.07 | -111.44 | 43.07 | 1195 | Beiswenger, Jane M.. Grays Lake | 10.21233/86rn-w288 |
| Los Penasquitos Lagoon | 16115 | 32.93 | -117.25 | 32.93 | 0 | Cole, Kenneth L.. Los Penasquitos Lagoon | 10.21233/bt94-dq60 |
| Crawford Lake | 16124 | 43.47 | -79.95 | 43.47 | 278 | Yu, Zicheng C.. Crawford Lake | 10.21233/gxbr-bj21 |
| Twiss Marl Pond | 16127 | 43.44 | -79.96 | 43.44 | 256 | Yu, Zicheng C.. Twiss Marl Pond | 10.21233/gvdd-q461 |
| Lima Bog | 16129 | 42.79 | -88.84 | 42.79 | 302 | Van Zant, Kent L.. Lima Bog | 10.21233/t4b6-ax18 |
| Mission Cross Bog | 16131 | 41.78 | -115.48 | 41.78 | 2424 | Thompson, Robert Stephen. Mission Cross Bog | 10.21233/620y-dx14 |
| Ruby Marsh | 16133 | 41.13 | -115.5 | 41.13 | 1818 | Thompson, Robert Stephen. Ruby Marsh | 10.21233/d01t-8d61 |
| Awl Site midden | 16135 | 35.52 | -116.63 | 35.52 | 960 | Anderson, R. Scott. Awl Site midden | 10.21233/b54c-8779 |
| Langdale Pond | 1614 | 30.64 | -83.19 | 30.64 | 58 | Grimm, Eric Christopher. Langdale Pond | 10.21233/n36s7g |
| Nelson Basin midden | 16147 | 35.35 | -116.73 | 35.35 | 1010 | Anderson, R. Scott. Nelson Basin midden | 10.21233/xtz5-nr35 |
| Nelson Basin midden | 16149 | 35.35 | -116.73 | 35.35 | 1010 | Anderson, R. Scott. Nelson Basin midden | 10.21233/nseb-7016 |
| Tourbière de Lanoraie STJEAN | 1615 | 46 | -73.22 | 46 | 20 | Comtois, Paul G.. Tourbière de Lanoraie STJEAN | 10.21233/n33067 |
| Nelson Basin midden | 16155 | 35.35 | -116.73 | 35.35 | 1010 | Anderson, R. Scott. Nelson Basin midden | 10.21233/z2p6-2175 |
| No Name East midden | 16159 | 35.43 | -116.57 | 35.43 | 1220 | Anderson, R. Scott. No Name East midden | 10.21233/srd6-w835 |
| Lateral Pond | 1617 | 65.94 | -135.51 | 65.94 | 470 | Ritchie, James C.. Lateral Pond | 10.21233/n3jb1t |
| No Name West midden | 16171 | 35.43 | -116.57 | 35.43 | 1310 | Anderson, R. Scott. No Name West midden | 10.21233/2y5g-vf43 |
| Binnewater Pond | 16175 | 41.41 | -74.55 | 41.41 | 256 | Robinson, Guy S.. Binnewater Pond | 10.21233/ywa8-4h38 |
| Hyde Park | 16177 | 41.79 | -73.9 | 41.79 | 74 | Robinson, Guy S.. Hyde Park | 10.21233/jsh7-n919 |
| Otisville | 16179 | 41.47 | -74.52 | 41.47 | 230 | Robinson, Guy S.. Otisville | 10.21233/pkt4-am12 |
| Pawelski Farm | 16181 | 41.33 | -74.43 | 41.33 | 122 | Robinson, Guy S.. Pawelski Farm | 10.21233/wy62-rm78 |
| Benicia State Park | 16184 | 38.07 | -122.19 | 38.07 | 0 | Malamud-Roam, Francis. Benicia State Park | 10.21233/jhwb-y436 |
| China Camp | 16186 | 38.01 | -122.49 | 38.01 | 0 | Goman, Michelle; Malamud-Roam, Francis. China Camp | 10.21233/y4mj-v434 |
| Rice Lake | 16189 | 44.2 | -78.14 | 44.2 | NA | McAndrews, John H.. Rice Lake | 10.21233/7ptd-jy37 |
| Rice Lake | 16191 | 44.2 | -78.14 | 44.2 | NA | McAndrews, John H.. Rice Lake | 10.21233/4z2b-kt62 |
| Rice Lake | 16193 | 44.2 | -78.14 | 44.2 | NA | McAndrews, John H.. Rice Lake | 10.21233/0yz5-ad05 |
| Mountain Lake | 16197 | 37.79 | -122.47 | 37.79 | 37 | Reidy, Liam M.. Mountain Lake | 10.21233/ehwk-t858 |
| Leading Tickles | 1622 | 49.47 | -55.47 | 49.47 | 105 | Macpherson, Joyce B.. Leading Tickles | 10.21233/n39h1c |
| Black Mountain Lake | 16222 | 37.85 | -107.24 | 37.85 | 3413 | Jodry, Margret Ann Brierty; Reasoner, Mel A.. Black Mountain Lake | 10.21233/0pre-hx18 |
| Sky Pond | 16224 | 40.28 | -105.67 | 40.28 | 3320 | Reasoner, Mel A.. Sky Pond | 10.21233/cxev-3204 |
| Perch Lake | 16231 | 46.03 | -77.34 | 46.03 | 160 | Boyko-Diakonow, Maria; Terasmae, Jaan. Perch Lake | 10.21233/mf7y-nm83 |
| Red Green Lake | 16236 | 68.65 | -149.68 | 68.65 | 668 | Oswald, W. Wyatt. Red Green Lake | 10.21233/hf5z-sc17 |
| Tukuto Lake | 16238 | 68.5 | -157.03 | 68.5 | 505 | Oswald, W. Wyatt. Tukuto Lake | 10.21233/r5wm-z686 |
| Upper Capsule Lake | 16241 | 68.63 | -149.42 | 68.63 | 805 | Oswald, W. Wyatt. Upper Capsule Lake | 10.21233/833d-sq44 |
| Horseshoe Lake | 16251 | 38.7 | -90.1 | 38.7 | 27 | Ollendorf, Amy L.. Horseshoe Lake | 10.21233/pbwt-b156 |
| Horseshoe Lake | 16254 | 38.7 | -90.1 | 38.7 | 27 | Ollendorf, Amy L.. Horseshoe Lake | 10.21233/cznd-fg62 |
| McGinnis Lake | 16256 | 44.61 | -78.04 | 44.61 | 255 | McAndrews, John H.. McGinnis Lake | 10.21233/9222-df62 |
| McGinnis Lake | 16257 | 44.61 | -78.04 | 44.61 | 255 | McAndrews, John H.. McGinnis Lake | 10.21233/bckm-xs16 |
| Lac à Léonard | 1626 | 49.21 | -65.81 | 49.21 | 17 | Labelle, Claude; Larouche, Alayn C.; Richard, Pierre J. H.. Lac à Léonard | 10.21233/n3cm92 |
| Dugas Bay Bog | 16264 | 46.3 | -79.38 | 46.3 | 202 | McAndrews, John H.. Dugas Bay Bog | 10.21233/0c9y-af32 |
| Kilbride Swamp | 16267 | 43.46 | -79.92 | 43.46 | 265 | McAndrews, John H.; Turton, Charles L.. Kilbride Swamp | 10.21233/vc6z-er41 |
| Mark Pond | 16269 | 51.84 | -89.62 | 51.84 | 348 | McAndrews, John H.; Turton, Charles L.. Mark Pond | 10.21233/nn2g-qt23 |
| Preston Lake | 16271 | 43.99 | -79.38 | 43.99 | 320 | McAndrews, John H.; Turton, Charles L.. Preston Lake | 10.21233/pcmd-m560 |
| Rife Swamp | 16273 | 43.47 | -79.99 | 43.47 | 277 | McAndrews, John H.; Turton, Charles L.. Rife Swamp | 10.21233/xrxy-ha25 |
| Round Pond | 16275 | 52.53 | -91.37 | 52.53 | 358 | McAndrews, John H.. Round Pond | 10.21233/bcqk-fe25 |
| Webbs Lake | 16278 | 44.17 | -78.1 | 44.17 | 234 | McAndrews, John H.. Webbs Lake | 10.21233/fb6e-1p18 |
| Lewis Lake | 1629 | 45.75 | -93.36 | 45.75 | 295 | McAndrews, John H.. Lewis Lake | 10.21233/n30b27 |
| Lily Lake | 1632 | 59.2 | -135.4 | 59.2 | 230 | Cwynar, Les C.. Lily Lake | 10.21233/n31358 |
| Lily Lake | 1635 | 43.77 | -110.32 | 43.77 | 2469 | Whitlock, Cathy. Lily Lake | 10.21233/n36x6g |
| Lily Lake Fen | 1637 | 43.77 | -110.32 | 43.77 | 2469 | Whitlock, Cathy. Lily Lake Fen | 10.21233/n3c93p |
| Little Bass Lake | 1639 | 47.29 | -93.6 | 47.29 | 391 | Swain, Patricia C.. Little Bass Lake | 10.21233/n37m0d |
| Little Lake | 1640 | 45.14 | -66.71 | 45.14 | 64 | Mott, Robert J.. Little Lake | 10.21233/n33s8x |
| Little Lake | 1642 | 44.17 | -123.58 | 44.17 | 217 | Whitlock, Cathy; Worona, Marc A.. Little Lake | 10.21233/n3ff1x |
| Little Pine Lake | 1643 | 45.28 | -91.48 | 45.28 | 330 | Gajewski, Konrad J.. Little Pine Lake | 10.21233/n39m9f |
| LDDsite5772 | 1644 | 44.8 | -76.68 | 44.8 | 206 | Mott, Robert J.. LDDsite5772 | 10.21233/n35x65 |
| Lake Annie | 1648 | 27.21 | -81.35 | 27.21 | 34 | Watts, William A.. Lake Annie | 10.21233/n32w78 |
| Lake of the Clouds | 1649 | 48.14 | -91.11 | 48.14 | 462 | Craig, Alan J.. Lake of the Clouds | 10.21233/n3j73j |
| Lake Hope Simpson | 1650 | 52.45 | -56.43 | 52.45 | 295 | Hansen, Barbara C. S.. Lake Hope Simpson | 10.21233/n3df07 |
| Lockport Gulf Section | 1655 | 43.17 | -78.72 | 43.17 | 109 | McAndrews, John H.. Lockport Gulf Section | 10.21233/n35m0s |
| Lofty Lake | 1656 | 54.73 | -112.48 | 54.73 | 620 | Lichti-Federovich, Sigrid. Lofty Lake | 10.21233/n31w7z |
| Lone Fox Lake | 1657 | 56.72 | -119.72 | 56.72 | 1100 | MacDonald, Glen. Lone Fox Lake | 10.21233/n3h74m |
| Lonesome Lake | 1658 | 44.14 | -71.7 | 44.14 | 831 | Davis, Margaret B.; Spear, Ray W.. Lonesome Lake | 10.21233/n3cf2p |
| Long Lake (CA:Nunavut) | 1659 | 62.63 | -101.23 | 62.63 | 259 | Kay, Paul A.. Long Lake (CA:Nunavut) | 10.21233/n37q9v |
| Long Lake | 1660 | 36.01 | -108.83 | 36.01 | 2727 | Hansen, Barbara C. S.; Wright, Herbert E., Jr.. Long Lake | 10.21233/n33x89 |
| Longswamp | 1661 | 40.48 | -75.67 | 40.48 | 192 | Watts, William A.. Longswamp | 10.21233/n3073k |
| Loon Pond | 1663 | 45.03 | -68.2 | 45.03 | 110 | Jacobson, G.. Loon Pond | 10.21233/n34p86 |
| Lost Lake | 1665 | 46.72 | -87.97 | 46.72 | 524 | Brubaker, Linda Beck. Lost Lake | 10.21233/n3g73x |
| Lost Lake | 1666 | 47.64 | -110.48 | 47.64 | 1019 | Whitlock, Cathy. Lost Lake | 10.21233/n3bj11 |
| Lost P. | 1667 | 44.25 | -71.25 | 44.25 | 635 | Davis, Margaret B.; Spear, Ray W.. Lost P. | 10.21233/n36q9j |
| Louise Pond | 1670 | 52.95 | -131.76 | 52.95 | 650 | Mathewes, Rolf W.; Pellatt, Marlow G.. Louise Pond | 10.21233/n37d23 |
| Loxahatchee National Wildlife Refuge Site 1 (EPA Site 7) | 1671 | 26.48 | -80.42 | 26.48 | 5 | Willard, Debra A.. Loxahatchee National Wildlife Refuge Site 1 (EPA Site 7) | 10.21233/n33p98 |
| Lynn Lake | 1684 | 56.84 | -101.04 | 56.84 | 340 | Nichols, Harvey. Lynn Lake | 10.21233/n34t76 |
| Tourbière du lac Malbaie | 1691 | 47.6 | -70.98 | 47.6 | 818 | Larouche, Alayn C.; Richard, Pierre J. H.. Tourbière du lac Malbaie | 10.21233/n3cb31 |
| Maligne Lake | 1693 | 52.73 | -117.62 | 52.73 | 1675 | Kearney, Michael S.. Maligne Lake | 10.21233/n33t7w |
| Mangrove Lake | 1697 | 32.3 | -64.75 | 32.3 | 0 | Watts, William A.. Mangrove Lake | 10.21233/n30s80 |
| Mansell Pond | 1698 | 45.04 | -68.73 | 45.04 | 58 | Almquist, Heather R.. Mansell Pond | 10.21233/n3g45n |
| Maplehurst Lake | 1701 | 43.23 | -80.66 | 43.23 | 300 | Mott, Robert J.. Maplehurst Lake | 10.21233/n32t7k |
| Lac Marcotte | 1703 | 47.08 | -71.42 | 47.08 | 503 | Labelle, Claude; Larouche, Alayn C.; Richard, Pierre J. H.. Lac Marcotte | 10.21233/n3793f |
| M Lake | 1704 | 68.27 | -133.47 | 68.27 | 105 | Ritchie, James C.. M Lake | 10.21233/n33h1h |
| Marion Lake | 1705 | 49.31 | -122.55 | 49.31 | 305 | Mathewes, Rolf W.. Marion Lake | 10.21233/n3jt89 |
| Mariposa Lake | 1707 | 44.15 | -110.23 | 44.15 | 2730 | Whitlock, Cathy. Mariposa Lake | 10.21233/n3f45b |
| Martin Pond | 1708 | 47.17 | -94.94 | 47.17 | 472 | McAndrews, John H.. Martin Pond | 10.21233/n39b3d |
| Lac Martyne | 1709 | 56.78 | -64.83 | 56.78 | 365 | McAndrews, John H.. Lac Martyne | 10.21233/n35m96 |
| Mashapaug Pond | 1712 | 41.78 | -71.43 | 41.78 | 12 | Bernabo, J. Christopher. Mashapaug Pond | 10.21233/n36934 |
| Wapizagonke | 1715 | 46.73 | -73.03 | 46.73 | 230 | Larouche, Alayn C.; Richard, Pierre J. H.. Wapizagonke | 10.21233/n3d451 |
| Sud du Lac du Noyer | 1716 | 46.79 | -72.84 | 46.79 | 270 | Larouche, Alayn C.; Richard, Pierre J. H.. Sud du Lac du Noyer | 10.21233/n38f2r |
| Mayberry Well | 1717 | 33.7 | -108.3 | 33.7 | 2080 | Markgraf, Vera. Mayberry Well | 10.21233/n34n0t |
| Mayflower Lake | 1718 | 45.3 | -66.07 | 45.3 | 50 | Mayle, Frank. Mayflower Lake | 10.21233/n30x70 |
| McCarston's Lake | 1719 | 45.05 | -80.09 | 45.05 | 433 | McAndrews, John H.. McCarston's Lake | 10.21233/n3935r |
| McCraney Lake | 1720 | 47.17 | -95.7 | 47.17 | 446 | McAndrews, John H.. McCraney Lake | 10.21233/n3593t |
| McLaughlan Lake | 1723 | 45.36 | -76.55 | 45.36 | 196 | Anderson, Thane W.. McLaughlan Lake | 10.21233/n3gx7b |
| McMaster Lake | 1724 | 64.13 | -110.58 | 64.13 | 480 | Moser, Katrina A.. McMaster Lake | 10.21233/n3c45q |
| McNearney Lake | 1725 | 46.43 | -84.95 | 46.43 | 264 | Shane, Linda C. K.. McNearney Lake | 10.21233/n37f12 |
| Lovesick Lake | 17280 | 44.56 | -78.22 | 44.56 | NA | McAndrews, John H.; Turton, Charles L.. Lovesick Lake | 10.21233/55fv-qv05 |
| Lovesick Lake | 17281 | 44.56 | -78.22 | 44.56 | NA | McAndrews, John H.; Turton, Charles L.. Lovesick Lake | 10.21233/xbj8-6c11 |
| Little Salt Spring | 17285 | 27.08 | -82.23 | 27.08 | 6 | Brown, James G.. Little Salt Spring | 10.21233/a40y-j676 |
| Hestvatn | 17289 | 64.02 | -20.71 | 64.02 | 50 | Geirsdottir, Aslaug. Hestvatn | 10.21233/t3ta-xb77 |
| Vestra Gislholtsvatn | 17290 | 63.94 | -20.52 | 63.94 | 58 | Geirsdottir, Aslaug. Vestra Gislholtsvatn | 10.21233/2ddx-jr94 |
| Cycloid Lake | 17292 | 55.27 | -105.27 | 55.27 | 369 | Mott, Robert J.. Cycloid Lake | 10.21233/q744-pp22 |
| Lake Cleveland | 17296 | 42.32 | -113.65 | 42.32 | 2519 | Davis, Owen K.. Lake Cleveland | 10.21233/w2gd-mz79 |
| Middle Butte Cave | 17298 | 43.37 | -112.62 | 43.37 | 1590 | Davis, Owen K.. Middle Butte Cave | 10.21233/3r9h-5q68 |
| Rattlesnake Cave | 17300 | 43.56 | -112.63 | 43.56 | 1596 | Davis, Owen K.. Rattlesnake Cave | 10.21233/17em-y531 |
| Capitola Lake | 17304 | 45.52 | -89.56 | 45.52 | 460 | Calcote, Randy. Capitola Lake | 10.21233/8mna-yv25 |
| Medicine Lake | 1732 | 44.98 | -97.35 | 44.98 | 519 | Allen, K. E.. Medicine Lake | 10.21233/n3835f |
| Idavain Lake | 17320 | 58.77 | -155.95 | 58.77 | 223 | Anderson, Patricia M.. Idavain Lake | 10.21233/wq2v-5053 |
| Snipe Lake | 17322 | 60.63 | -154.3 | 60.63 | 579 | Anderson, Patricia M.. Snipe Lake | 10.21233/bx4k-0v94 |
| Imnavait Creek | 17324 | 68.67 | -149.36 | 68.67 | 875 | Eisner, Wendy R.. Imnavait Creek | 10.21233/w72d-bx06 |
| Oil Lake | 17326 | 70.29 | -151.17 | 70.29 | 745 | Eisner, Wendy R.. Oil Lake | 10.21233/j01p-4677 |
| Sands of Time Lake | 17328 | 66.03 | -147.55 | 66.03 | 242 | Edwards, Mary E.. Sands of Time Lake | 10.21233/tr2m-fm40 |
| Lac Mélèze | 1733 | 65.22 | -126.12 | 65.22 | 650 | MacDonald, Glen. Lac Mélèze | 10.21233/n34d25 |
| Sithylemenkat Lake | 17338 | 66.12 | -151.39 | 66.12 | 213 | Anderson, Patricia M.. Sithylemenkat Lake | 10.21233/r9wb-gz24 |
| St. Lawrence Section 2 | 17340 | 63.67 | -171.55 | 63.67 | 0 | Lozhkin, Anatoly V.. St. Lawrence Section 2 | 10.21233/p96n-6v19 |
| St. Lawrence Island Section 3 | 17347 | 63.67 | -171.58 | 63.67 | 0 | Lozhkin, Anatoly V.. St. Lawrence Island Section 3 | 10.21233/z81b-ch22 |
| Lake Mendota | 1735 | 43.1 | -89.42 | 43.1 | 257 | Winkler, Marjorie Green. Lake Mendota | 10.21233/n3fx71 |
| Windmill Lake | 17352 | 63.66 | -148.81 | 63.66 | 615 | Bigelow, Nancy H.. Windmill Lake | 10.21233/ckz2-ef80 |
| Blair Lakes | 17354 | 64.36 | -147.37 | 64.36 | 257 | Ager, Thomas A.. Blair Lakes | 10.21233/0jx5-7t71 |
| Circle Lake | 17355 | 59.8 | -151.16 | 59.8 | 419 | Ager, Thomas A.. Circle Lake | 10.21233/5awd-yk06 |
| Clam Gulch | 17357 | 60.22 | -151.36 | 60.22 | 86 | Ager, Thomas A.. Clam Gulch | 10.21233/kw77-m233 |
| Eightmile Lake | 17359 | 63.89 | -149.25 | 63.89 | 648 | Ager, Thomas A.. Eightmile Lake | 10.21233/v0wk-b742 |
| Grizzly Lake | 17361 | 62.71 | -144.2 | 62.71 | 720 | Ager, Thomas A.. Grizzly Lake | 10.21233/yyfp-bw15 |
| Panthertown Creek Bog | 17363 | 35.17 | -83.03 | 35.17 | 1119 | Martin, Elizabeth Marie. Panthertown Creek Bog | 10.21233/56yt-6d14 |
| Kalifonsky Beach | 17373 | 60.48 | -151.26 | 60.48 | 18 | Ager, Thomas A.. Kalifonsky Beach | 10.21233/mnr7-9981 |
| Homer Beach | 17375 | 59.63 | -151.51 | 59.63 | 10 | Ager, Thomas A.. Homer Beach | 10.21233/42z3-5s40 |
| Longmere Lake | 17377 | 60.5 | -150.91 | 60.5 | 78 | Ager, Thomas A.. Longmere Lake | 10.21233/z08c-rb24 |
| Lake Minchumina | 17379 | 63.89 | -152.24 | 63.89 | 196 | Ager, Thomas A.. Lake Minchumina | 10.21233/dxt2-xb51 |
| Mosquito Pond | 17381 | 63.99 | -145.54 | 63.99 | 379 | Ager, Thomas A.. Mosquito Pond | 10.21233/8dpn-sk91 |
| Otto Lake | 17383 | 63.84 | -149.04 | 63.84 | 548 | Ager, Thomas A.. Otto Lake | 10.21233/s9wz-1g21 |
| Watana Triangle Pond | 17385 | 62.84 | -148.25 | 62.84 | 546 | Ager, Thomas A.. Watana Triangle Pond | 10.21233/z5j4-8v57 |
| Beaver Lake | 17387 | 44.92 | -88.16 | 44.92 | 412 | Calcote, Randy. Beaver Lake | 10.21233/krw5-yg76 |
| Wiener Lake | 17389 | 61.81 | -148.17 | 61.81 | 604 | Ager, Thomas A.. Wiener Lake | 10.21233/wvgf-4546 |
| Zagoskin Lake | 17391 | 63.45 | -162.11 | 63.45 | 7 | Ager, Thomas A.. Zagoskin Lake | 10.21233/6pz8-g423 |
| Fishblue (Blue) Lake | 17393 | 49.99 | -121.49 | 49.99 | 381 | Mathewes, Rolf W.. Fishblue (Blue) Lake | 10.21233/znht-be73 |
| Steel Lake | 17396 | 46.97 | -94.68 | 46.97 | 415 | Stefanova, Ivanka; Tian, Jian; Wright, Herbert E., Jr.. Steel Lake | 10.21233/j12t-e851 |
| Mermaid Bog | 1740 | 46.25 | -63.02 | 46.25 | 15 | Anderson, Thane W.. Mermaid Bog | 10.21233/n32q99 |
| South Lake | 17400 | 69.08 | -121.43 | 69.08 | 775 | St. Jacques, Jeannine-Marie. South Lake | 10.21233/fnwr-vt02 |
| Little Swift Lake | 17402 | 60.22 | -159.77 | 60.22 | 572 | Axford, Yarrow. Little Swift Lake | 10.21233/e34c-fp95 |
| Lorraine Lake | 17404 | 46.14 | -86.48 | 46.14 | 437 | Calcote, Randy. Lorraine Lake | 10.21233/x0jy-tp30 |
| Penegor Lake | 17406 | 46.62 | -88.86 | 46.62 | 437 | Calcote, Randy. Penegor Lake | 10.21233/7hjv-yz55 |
| Kelly Lake | 17409 | 46.44 | -81.07 | 46.44 | 254 | Richard, Mary Jacqueline. Kelly Lake | 10.21233/6kcg-wt29 |
| Big Cypress Bend [End boardwalk "Fak10 endB"] | 17417 | 25.95 | -81.47 | 25.95 | 2 | Donders, Timme E.. Big Cypress Bend [End boardwalk "Fak10 endB"] | 10.21233/xrzb-zq82 |
| Cumbres Bog | 17419 | 37.02 | -106.45 | 37.02 | 3100 | Johnson, Bradley Gordon. Cumbres Bog | 10.21233/krp4-jk87 |
| Lac Mimi | 1754 | 47.5 | -70.38 | 47.5 | 423 | Larouche, Alayn C.; Poulin, Philippe; Richard, Pierre J. H.. Lac Mimi | 10.21233/n3874f |
| Minakokosa Lake | 1755 | 66.92 | -155.03 | 66.92 | 122 | Anderson, Patricia M.. Minakokosa Lake | 10.21233/n34j15 |
| Lake Minnie | 1757 | 47.24 | -95.01 | 47.24 | 430 | McAndrews, John H.. Lake Minnie | 10.21233/n30q89 |
| Mirror Pool | 1759 | 46.53 | -97.24 | 46.53 | 302 | McAndrews, John H.. Mirror Pool | 10.21233/n35645 |
| Benacadie 4 | 17597 | 45.92 | -60.69 | 45.92 | 7 | Mott, Robert J.. Benacadie 4 | 10.21233/s3er-nf45 |
| Molas Lake | 1761 | 37.75 | -107.68 | 37.75 | 3200 | Maher, Louis J., Jr.. Molas Lake | 10.21233/n3gq91 |
| Lismore Section | 17617 | 45.7 | -62.27 | 45.7 | 2 | Mott, Robert J.. Lismore Section | 10.21233/1gkg-2a65 |
| Molas Pass Bog | 1762 | 37.74 | -107.7 | 37.74 | 3220 | Maher, Louis J., Jr.. Molas Pass Bog | 10.21233/n3c162 |
| Monhegan Island Meadow | 1763 | 43.77 | -69.3 | 43.77 | 3 | Bostwick, Lisa G.. Monhegan Island Meadow | 10.21233/n3775h |
| Lac Montagnais | 1765 | 47.91 | -71.17 | 47.91 | 800 | Larouche, Alayn C.; Richard, Pierre J. H.. Lac Montagnais | 10.21233/n33j0g |
| Montezuma Well | 1766 | 34.65 | -111.75 | 34.65 | 1081 | Davis, Owen K.. Montezuma Well | 10.21233/n3cq0p |
| Wilcox Lake | 17672 | 43.95 | -79.43 | 43.95 | 304 | McAndrews, John H.. Wilcox Lake | 10.21233/skp4-td45 |
| Moon Lake | 1768 | 46.86 | -98.16 | 46.86 | 444 | Grimm, Eric Christopher. Moon Lake | 10.21233/n3464v |
| Spirea Wetland | 17689 | 43.26 | -80.26 | 43.26 | 255 | Bunting, M. Jane; Warner, Barry G.. Spirea Wetland | 10.21233/964d-n697 |
| 18 [Moraine Lake] | 1769 | 52.27 | -58.05 | 52.27 | 385 | Hansen, Barbara C. S.. 18 [Moraine Lake] | 10.21233/n30h1k |
| Mordsger Lake | 1770 | 51.38 | -94.25 | 51.38 | 400 | McAndrews, John H.. Mordsger Lake | 10.21233/n3ft8c |
| Lake A | 17711 | 55.33 | -105.06 | 55.33 | 378 | Wilson, Malcolm Alan. Lake A | 10.21233/v7nq-4w81 |
| West Naniskak Lake | 17713 | 55.43 | -104.94 | 55.43 | 418 | Wilson, Malcolm Alan. West Naniskak Lake | 10.21233/h72j-y982 |
| Marl Pond | 17715 | 55.05 | -105.39 | 55.05 | 379 | Wilson, Malcolm Alan. Marl Pond | 10.21233/t9vp-hk80 |
| Silver Lake | 17717 | 40.35 | -83.81 | 40.35 | 332 | Gill, Jacquelyn L.; Jackson, Stephen T.; Williams, John W.. Silver Lake | 10.21233/2ecb-3b52 |
| Mosquito Lake Bog | 1772 | 48.77 | -122.12 | 48.77 | 198 | Watts, William A.. Mosquito Lake Bog | 10.21233/n36b3g |
| Moulton Pond | 1773 | 44.63 | -68.64 | 44.63 | 143 | Davis, Ronald B.. Moulton Pond | 10.21233/n32j05 |
| Mud Creek Site 1 | 1775 | 25.22 | -80.6 | 25.22 | 5 | Willard, Debra A.. Mud Creek Site 1 | 10.21233/n3706g |
| Mud Lake | 1776 | 29.3 | -81.87 | 29.3 | 9 | Watts, William A.. Mud Lake | 10.21233/n3364j |
| Mud Lake | 1777 | 44.23 | -93.83 | 44.23 | 308 | McAndrews, John H.. Mud Lake | 10.21233/n3jj1w |
| Mud Lake | 1778 | 46.86 | -94.76 | 46.86 | 424 | Almendinger, John C.. Mud Lake | 10.21233/n3dt82 |
| Munday Creek | 1780 | 60.03 | -141.97 | 60.03 | 88 | Peteet, Dorothy M.. Munday Creek | 10.21233/n3917t |
| Murphy Lake | 1781 | 44.71 | -93.34 | 44.71 | 280 | McAndrews, John H.. Murphy Lake | 10.21233/n35b2s |
| Muscotah Marsh | 1782 | 39.53 | -95.51 | 39.53 | 280 | Grüger, Johanna. Muscotah Marsh | 10.21233/vrv9-4t45 |
| Muskox Lake | 1783 | 71.78 | -122.67 | 71.78 | 305 | Gajewski, Konrad J.. Muskox Lake | 10.21233/n39s7d |
| Kealia Pond | 17832 | 20.79 | -156.48 | 20.79 | 0 | Pau, Stephanie. Kealia Pond | 10.21233/2q7v-1454 |
| Myrtle Lake | 1786 | 47.98 | -93.39 | 47.98 | 393 | Janssen, C. Roel. Myrtle Lake | 10.21233/n3293w |
| Natla Bog | 1788 | 63.02 | -128.8 | 63.02 | 1380 | MacDonald, Glen. Natla Bog | 10.21233/n3hn07 |
| Natural Lake | 1789 | 34.66 | -95.39 | 34.66 | 170 | Albert, Lois E.. Natural Lake | 10.21233/n3ct8r |
| Nedlouc | 1791 | 57.65 | -71.65 | 57.65 | 330 | Larouche, Alayn C.; Richard, Pierre J. H.. Nedlouc | 10.21233/n34b2g |
| Nels Lake | 1793 | 48.02 | -91.89 | 48.02 | 428 | Shane, Linda C. K.. Nels Lake | 10.21233/n38s8g |
| Nelson Pond | 1794 | 46.41 | -92.69 | 46.41 | 335 | Jacobson, G.. Nelson Pond | 10.21233/n3506v |
| Mitkof Island | 17945 | 56.81 | -132.94 | 56.81 | 20 | Ager, Thomas A.. Mitkof Island | 10.21233/yzzz-aa38 |
| Little Shingobee Lake | 17947 | 46.99 | -94.69 | 46.99 | 408 | Doner, Lisa A.. Little Shingobee Lake | 10.21233/0dt6-3493 |
| Neville Marsh | 1796 | 40.55 | -83.83 | 40.55 | 305 | Shane, Linda C. K.. Neville Marsh | 10.21233/n3gn0x |
| Nichols Brook Site | 1799 | 42.54 | -78.48 | 42.54 | 438 | McAndrews, John H.. Nichols Brook Site | 10.21233/n37443 |
| Tower Lake | 17993 | 46.54 | -86.04 | 46.54 | 261 | Andersen, Jennifer Jewell; Booth, Robert K.; Jackson, Stephen T.; Jones, Rachel A.; Minckley, Thomas A.; Reeves, Kelly. Tower Lake | 10.21233/n5zh-5029 |
| Nicol Lake | 1800 | 61.58 | -103.48 | 61.58 | 348 | Kay, Paul A.. Nicol Lake | 10.21233/n33b3j |
| Niliq Lake | 1806 | 67.87 | -160.43 | 67.87 | 274 | Anderson, Patricia M.. Niliq Lake | 10.21233/n3fn0m |
| Nina Lake | 1807 | 46.6 | -81.5 | 46.6 | 380 | Liu, Kam-biu. Nina Lake | 10.21233/n39x6d |
| Blue Lakes | 18106 | 41.68 | -118.72 | 41.68 | 2437 | Minckley, Thomas A.. Blue Lakes | 10.21233/s4jg-yh87 |
| NEL03 | 18108 | 49.5 | -116.9 | 49.5 | 2074 | Courtney Mustaphi, Colin J.. NEL03 | 10.21233/6vn0-1104 |
| Path Lake | 18110 | 43.87 | -64.93 | 43.87 | 10 | Gajewski, Konrad J.; Neil, Karen. Path Lake | 10.21233/x2md-aj39 |
| Pyatts Lake | 18127 | 49.47 | -115.77 | 49.47 | 1080 | Courtney Mustaphi, Colin J.. Pyatts Lake | 10.21233/1jd5-2935 |
| No Bottom Pond | 1814 | 41.28 | -70.21 | 41.28 | 6 | Dunwiddie, Peter W.. No Bottom Pond | 10.21233/n3jf27 |
| Mod Pond | 18159 | 34.79 | -120.59 | 34.79 | 21 | Anderson, R. Scott. Mod Pond | 10.21233/t00e-b616 |
| North Pond | 1817 | 42.65 | -73.05 | 42.65 | 586 | Whitehead, Donald R.. North Pond | 10.21233/n38x63 |
| Water Conservation Area 3B, Nuthouse Far Tail | 1818 | 25.89 | -80.56 | 25.89 | 5 | Willard, Debra A.. Water Conservation Area 3B, Nuthouse Far Tail | 10.21233/n3545v |
| Water Conservation Area 3B, Nuthouse Head | 1819 | 25.89 | -80.51 | 25.89 | 5 | Willard, Debra A.. Water Conservation Area 3B, Nuthouse Head | 10.21233/n31f2k |
| Nutt Lake | 1820 | 45.22 | -79.45 | 45.22 | 305 | Bennett, Keith D.. Nutt Lake | 10.21233/n39m01 |
| Northwest River Pond | 1821 | 53.52 | -60.17 | 53.52 | 29 | Jordan, Richard H.. Northwest River Pond | 10.21233/n35w76 |
| Lake O'Hara | 1823 | 51.36 | -116.35 | 51.36 | 2015 | Reasoner, Mel A.. Lake O'Hara | 10.21233/n3hf2x |
| West Okoboji Lake | 1824 | 43.34 | -95.13 | 43.34 | 426 | Van Zant, Kent L.. West Okoboji Lake | 10.21233/n3cq93 |
| Old Field | 1826 | 37.12 | -89.83 | 37.12 | 97 | King, James E.. Old Field | 10.21233/n3475k |
| Oliver Pond | 1829 | 48.42 | -89.32 | 48.42 | 250 | McAndrews, John H.. Oliver Pond | 10.21233/n38m0q |
| Lake Onamia | 1830 | 46.07 | -93.68 | 46.07 | 380 | McAndrews, John H.. Lake Onamia | 10.21233/n34w9n |
| Ondris Pond | 1831 | 46.34 | -94.41 | 46.34 | 363 | Jacobson, G.. Ondris Pond | 10.21233/n3136n |
| Lake Ontario, Rochester Basin | 1833 | 43.51 | -76.9 | 43.51 | 75 | McAndrews, John H.. Lake Ontario, Rochester Basin | 10.21233/n3bq8d |
| Lake Ontario, Mississauga Basin | 1834 | 43.56 | -78.15 | 43.56 | 75 | McAndrews, John H.. Lake Ontario, Mississauga Basin | 10.21233/n36x7v |
| Opabin Lake | 1835 | 51.34 | -116.31 | 51.34 | 2280 | Reasoner, Mel A.. Opabin Lake | 10.21233/n3374w |
| Otto Mielke Lake | 1840 | 45.92 | -89.63 | 45.92 | 495 | Shane, Linda C. K.. Otto Mielke Lake | 10.21233/n30650 |
| Lac Ouellet | 1841 | 47.53 | -68.94 | 47.53 | 300 | Larouche, Alayn C.; Lortie, G.; Richard, Pierre J. H.. Lac Ouellet | 10.21233/n3fj1z |
| Palace Pier Section | 1847 | 43.62 | -79.48 | 43.62 | 73 | McAndrews, John H.. Palace Pier Section | 10.21233/n32w8n |
| Panther Run Pond | 1848 | 40.8 | -77.42 | 40.8 | 634 | Watts, William A.. Panther Run Pond | 10.21233/n3j74x |
| Paradise Lake | 1849 | 53.05 | -57.75 | 53.05 | 180 | Lamb, Henry F.. Paradise Lake | 10.21233/n3dj08 |
| Park Pond 1 | 1852 | 43.47 | -109.96 | 43.47 | 2705 | Lynch, Elizabeth A.. Park Pond 1 | 10.21233/n3175n |
| Park Pond 2 | 1854 | 43.45 | -109.94 | 43.45 | 2714 | Lynch, Elizabeth A.. Park Pond 2 | 10.21233/n35q0t |
| Park Pond 3 | 1856 | 43.46 | -109.92 | 43.46 | 2739 | Lynch, Elizabeth A.. Park Pond 3 | 10.21233/n3hb38 |
| Parkhill Creek | 1857 | 43.18 | -81.75 | 43.18 | 181 | McAndrews, John H.. Parkhill Creek | 10.21233/n3cj1b |
| Parrott's Pond | 1858 | 44.22 | -76.7 | 44.22 | 74 | McAndrews, John H.. Parrott's Pond | 10.21233/n37t8h |
| Pasacaco Pond | 1859 | 41.52 | -71.45 | 41.52 | 3 | Bernabo, J. Christopher. Pasacaco Pond | 10.21233/n3415h |
| Pass Lake | 1862 | 48.56 | -88.74 | 48.56 | 250 | McAndrews, John H.. Pass Lake | 10.21233/n34p9k |
| Lac Patricia | 1864 | 56.67 | -64.68 | 56.67 | 538 | McAndrews, John H.. Lac Patricia | 10.21233/n31070 |
| Paynter Marsh | 1868 | 44.1 | -78.34 | 44.1 | 188 | McAndrews, John H.. Paynter Marsh | 10.21233/n3317z |
| Peatsah Section | 1879 | 43.33 | -79.82 | 43.33 | 92 | McAndrews, John H.. Peatsah Section | 10.21233/n3b94r |
| Ped Pond | 1882 | 67.2 | -142.07 | 67.2 | 211 | Brubaker, Linda Beck. Ped Pond | 10.21233/n3j458 |
| Peggy Lake | 1883 | 49.48 | -92 | 49.48 | 470 | McAndrews, John H.. Peggy Lake | 10.21233/n3db4q |
| Pennington Lake | 1884 | 45.78 | -93.27 | 45.78 | 48 | McAndrews, John H.. Pennington Lake | 10.21233/n38m94 |
| Perch Lake | 1888 | 51.65 | -100.9 | 51.65 | 701 | Ritchie, James C.. Perch Lake | 10.21233/n3994f |
| Lac Petel | 1890 | 50.55 | -66.27 | 50.55 | 270 | King, George A.. Lac Petel | 10.21233/n31s9p |
| Peterson Slough | 1891 | 46.97 | -95.32 | 46.97 | 460 | Almendinger, John C.. Peterson Slough | 10.21233/n3h45z |
| Pilot Mound Site | 1897 | 42.16 | -93.9 | 42.16 | 352 | Baker, Richard G.. Pilot Mound Site | 10.21233/n3893r |
| Pinecrest Lake | 1902 | 49.49 | -121.43 | 49.49 | 320 | Mathewes, Rolf W.. Pinecrest Lake | 10.21233/n3bf2c |
| Pink Lake | 1904 | 45.47 | -75.81 | 45.47 | 162 | Mott, Robert J.. Pink Lake | 10.21233/n36n0f |
| Pixie Lake | 1906 | 48.6 | -124.2 | 48.6 | 70 | Brown, Kendrick J.. Pixie Lake | 10.21233/n3c36r |
| Naskak | 19264 | 63.64 | -171.45 | 63.64 | 1 | Lozhkin, Anatoly V.. Naskak | 10.21233/2x38-6j55 |
| Aghnaghak | 19266 | 63.66 | -171.55 | 63.66 | 1 | Lozhkin, Anatoly V.. Aghnaghak | 10.21233/kcep-vj71 |
| TK-2 Lake | 19323 | 66.35 | -104.95 | 66.35 | 234 | Seppä, Heikki. TK-2 Lake | 10.21233/17ta-5252 |
| Pleasant Lake | 1955 | 44.61 | -93.56 | 44.61 | 274 | McAndrews, John H.. Pleasant Lake | 10.21233/n31h1w |
| Lac Pluvieux | 1957 | 47.84 | -69.35 | 47.84 | 180 | Larouche, Alayn C.; Lortie, G.; Richard, Pierre J. H.. Lac Pluvieux | 10.21233/n3gt8p |
| Poland Spring Pond | 1961 | 44.03 | -70.35 | 44.03 | 94 | Jacobson, G.. Poland Spring Pond | 10.21233/n3cs9s |
| Lake Tulane | 19620 | 27.59 | -81.5 | 27.59 | 32 | Grimm, Eric Christopher; Hansen, Barbara C. S.; Jacobson, G.; Watts, William A.. Lake Tulane | 10.21233/n3jb-zm10 |
| Porphyry Lake | 1964 | 48.91 | -123.83 | 48.91 | 1100 | Brown, Kendrick J.. Porphyry Lake | 10.21233/n3494w |
| Porqui Pond | 1965 | 44.93 | -79.78 | 44.93 | 188 | McAndrews, John H.. Porqui Pond | 10.21233/n30m1m |
| Portage Lake | 1966 | 47.08 | -94.11 | 47.08 | 397 | McAndrews, John H.. Portage Lake | 10.21233/n3ft9r |
| Portage Marsh | 1967 | 41.58 | -87.22 | 41.58 | 189 | Jackson, Stephen T.. Portage Marsh | 10.21233/n3b45d |
| Portage Bog | 1968 | 46.67 | -64.08 | 46.67 | 8 | Anderson, Thane W.. Portage Bog | 10.21233/n36b4v |
| Posy Lake | 1970 | 37.94 | -111.7 | 37.94 | 2653 | Davis, Owen K.; Shafer, David Scott. Posy Lake | 10.21233/n3bs9g |
| Potts Mountain Pond | 1972 | 37.6 | -80.13 | 37.6 | 840 | Watts, William A.. Potts Mountain Pond | 10.21233/n3736h |
| Powers Fort Swale | 1974 | 36.6 | -90.58 | 36.6 | 91 | Royall, P. Daniel. Powers Fort Swale | 10.21233/n3jn0j |
| Chesapeake Bay, Parker Creek | 1975 | 38.55 | -76.48 | 38.55 | 0 | Willard, Debra A.. Chesapeake Bay, Parker Creek | 10.21233/n3dx83 |
| Protection Bog | 1980 | 42.62 | -78.47 | 42.62 | 430 | Miller, Norton G.. Protection Bog | 10.21233/n39s8s |
| Point Escuminac | 1981 | 47.08 | -64.8 | 47.08 | 6 | Warner, Barry G.. Point Escuminac | 10.21233/n36366 |
| Madelia | 19812 | 44.08 | -94.42 | 44.08 | 303 | Fries, Magnus. Madelia | 10.21233/m57c-a803 |
| Trout Lake | 19814 | 68.83 | -138.74 | 68.83 | 163 | Fritz, Michael. Trout Lake | 10.21233/04w0-7r18 |
| Chesapeake Bay, Potomac River | 1982 | 38.03 | -76.22 | 38.03 | 0 | Willard, Debra A.. Chesapeake Bay, Potomac River | 10.21233/n32d3x |
| Killebrew Lake Fen | 19820 | 48.61 | -122.9 | 48.61 | 88 | Dunwiddie, Peter W.; Leopold, Estella B.; Nickman, Rudy; Watts, William A.; Whitlock, Cathy. Killebrew Lake Fen | 10.21233/x8y7-re14 |
| Fox Lake | 19834 | 43.68 | -94.7 | 43.68 | 382 | Commerford, Julie L.. Fox Lake | 10.21233/dzp4-pv02 |
| Chesapeake Bay, Patuxent River (2-P-5) | 1984 | 38.33 | -76.31 | 38.33 | 0 | Willard, Debra A.. Chesapeake Bay, Patuxent River (2-P-5) | 10.21233/n3cx61 |
| Lac Brule | 19842 | 45.72 | -75.44 | 45.72 | 270 | Lafontaine-Boyer, Karelle. Lac Brule | 10.21233/98bb-am31 |
| Lac Noir | 19846 | 45.78 | -75.14 | 45.78 | 176 | Paquette, Natalie. Lac Noir | 10.21233/0xmq-rz62 |
| Puyuk Lake | 1987 | 63.5 | -162.2 | 63.5 | 15 | Ager, Thomas A.. Puyuk Lake | 10.21233/n30q9p |
| Lone Star Lake | 19931 | 45.93 | -92.36 | 45.93 | 284 | Calcote, Randy; Hotchkiss, Sara C.; Lynch, Elizabeth A.. Lone Star Lake | 10.21233/txpr-cb18 |
| Lily Lake | 19933 | 45.9 | -92.27 | 45.9 | 297 | Calcote, Randy; Hotchkiss, Sara C.; Lynch, Elizabeth A.. Lily Lake | 10.21233/watr-af89 |
| Spicer Lake | 19937 | 41.76 | -86.52 | 41.76 | 242 | Gill, Jacquelyn L.; Wang, Yue; Williams, John W.. Spicer Lake | 10.21233/0zcx-jb34 |
| Mary Lake | 19967 | 44.74 | -81 | 44.74 | 236 | Bennett, Keith D.. Mary Lake | 10.21233/jqgd-sd88 |
| Cooley Lake | 19993 | 49.49 | -117.65 | 49.49 | 1515 | Gavin, Daniel G.. Cooley Lake | 10.21233/q20r-m406 |
| Gerry Lake | 19995 | 53.65 | -121.51 | 53.65 | 893 | Gavin, Daniel G.. Gerry Lake | 10.21233/11hj-eq70 |
| Wentworth Lake | 19997 | 48.01 | -124.53 | 48.01 | 58 | Gavin, Daniel G.; Herring, Erin M.. Wentworth Lake | 10.21233/9pdf-7072 |
| Crocker Lake | 20001 | 47.94 | -122.88 | 47.94 | 54 | Brubaker, Linda Beck; McLachlan, Jason S.. Crocker Lake | 10.21233/6qkv-y767 |
| Pyle Site | 2001 | 40.67 | -84.88 | 40.67 | 250 | Shane, Linda C. K.. Pyle Site | 10.21233/n3674t |
| Cedar Swamp | 20014 | 47.91 | -122.87 | 47.91 | 60 | Brubaker, Linda Beck; McLachlan, Jason S.. Cedar Swamp | 10.21233/hsdf-hx86 |
| Quarles Pond | 2003 | 38 | -79.07 | 38 | 500 | Craig, Alan J.. Quarles Pond | 10.21233/n32j1j |
| Queens Lake | 2004 | 64.12 | -110.57 | 64.12 | 480 | MacDonald, Glen. Queens Lake | 10.21233/n3bq0c |
| Quillin Site | 2007 | 41 | -81.97 | 41 | 305 | Shane, Linda C. K.. Quillin Site | 10.21233/n3jj28 |
| Radtke Lake | 2011 | 43.4 | -88.1 | 43.4 | 274 | Webb, Sara L.. Radtke Lake | 10.21233/n3dq81 |
| Rivière-aux-Feuilles 1 | 2013 | 58.23 | -72.07 | 58.23 | 205 | Larouche, Alayn C.; Richard, Pierre J. H.. Rivière-aux-Feuilles 1 | 10.21233/n3574h |
| Rivière-aux-Feuilles 2 | 2015 | 58.22 | -71.95 | 58.22 | 225 | Larouche, Alayn C.; Richard, Pierre J. H.. Rivière-aux-Feuilles 2 | 10.21233/n39q1f |
| Tourbière de la Rivière-aux-Feuilles | 2016 | 58.23 | -72.07 | 58.23 | 200 | Gagnon, R.; Gray, J. T.; Larouche, Alayn C.; Lauriol, Bernard; Payette, Serge; Richard, Pierre J. H.. Tourbière de la Rivière-aux-Feuilles | 10.21233/n35w8k |
| Lake Hill | 20188 | 57.18 | -170.25 | 57.18 | 37 | Wang, Yue. Lake Hill | 10.21233/jyp9-k385 |
| Kettle Lake | 20194 | 48.61 | -103.62 | 48.61 | 605 | Grimm, Eric Christopher. Kettle Lake | 10.21233/bm1c-7055 |
| Anderson Lake | 202 | 46.42 | -92.72 | 46.42 | NA | Wright, Herbert E., Jr.. Anderson Lake | 10.21233/n33w32 |
| Ra Lake | 2022 | 65.23 | -126.42 | 65.23 | 330 | MacDonald, Glen. Ra Lake | 10.21233/n30j0j |
| Ramsay Lake | 2023 | 45.6 | -76.1 | 45.6 | 200 | Mott, Robert J.. Ramsay Lake | 10.21233/n38q0r |
| Ranger Lake | 2025 | 67.15 | -153.65 | 67.15 | 820 | Brubaker, Linda Beck. Ranger Lake | 10.21233/n31659 |
| Rapid Lake | 2026 | 42.73 | -109.19 | 42.73 | 3134 | Fall, Patricia Lynn. Rapid Lake | 10.21233/n3gj0w |
| Rattle Lake | 2028 | 49.35 | -92.7 | 49.35 | 460 | Björck, Svante. Rattle Lake | 10.21233/zesr-6507 |
| Dragonfly Lake | 20281 | 60.81 | -135.34 | 60.81 | 760 | Edwards, Mary E.. Dragonfly Lake | 10.21233/596h-wc50 |
| Haircut Lake | 20287 | 60.52 | -133.21 | 60.52 | 1000 | Edwards, Mary E.. Haircut Lake | 10.21233/zc0w-ge65 |
| Anderson Pond | 203 | 36.03 | -85.5 | 36.03 | 303 | Delcourt, Hazel R.. Anderson Pond | 10.21233/n30302 |
| Rayburn's Dome | 2030 | 32.47 | -93.17 | 32.47 | 61 | Fredlund, Glen G.. Rayburn's Dome | 10.21233/n3ch3r |
| Hunters Lake | 20304 | 37.61 | -106.84 | 37.61 | 3516 | Anderson, R. Scott. Hunters Lake | 10.21233/959q-kw55 |
| Dailey Lake | 20306 | 45.26 | -110.82 | 45.26 | 1598 | Krause, Teresa; Whitlock, Cathy. Dailey Lake | 10.21233/cp60-cs35 |
| Blacktail Pond | 20308 | 44.96 | -110.6 | 44.96 | 2012 | Krause, Teresa; Whitlock, Cathy. Blacktail Pond | 10.21233/y0pj-8d71 |
| Elk Lake | 20311 | 45.87 | -95.8 | 45.87 | 366 | Jaumann, Peter Joseph. Elk Lake | 10.21233/r0mg-q111 |
| Fish Lake | 20316 | 41.26 | -123.68 | 41.26 | 541 | Crawford, Jeffrey N.; Mensing, Scott A.. Fish Lake | 10.21233/bt6r-4598 |
| South Rhody peatland | 20397 | 46.57 | -86.08 | 46.57 | 285 | Booth, Robert K.; Jackson, Stephen T.. South Rhody peatland | 10.21233/r0kz-yt78 |
| Andree Bog | 204 | 45.73 | -93.25 | 45.73 | 300 | Cushing, Edward J., Jr.. Andree Bog | 10.21233/n3fd53 |
| Rebel Lake | 2045 | 67.42 | -149.8 | 67.42 | 914 | Anderson, Patricia M.. Rebel Lake | 10.21233/n35467 |
| Redondo Lake | 2047 | 67.68 | -155.03 | 67.68 | 460 | Brubaker, Linda Beck. Redondo Lake | 10.21233/n39h34 |
| Vallée de l'Albion | 2048 | 45.67 | -71.33 | 45.67 | 320 | Larouche, Alayn C.; Lavoie, Martin; Richard, Pierre J. H.. Vallée de l'Albion | 10.21233/n35s9x |
| Redrock Lake | 2049 | 40.08 | -105.54 | 40.08 | 3095 | Maher, Louis J., Jr.. Redrock Lake | 10.21233/n3236z |
| Ogaromtoc Lake | 20495 | 41.49 | -123.54 | 41.49 | 596 | Crawford, Jeffrey N.; Mensing, Scott A.. Ogaromtoc Lake | 10.21233/n5d1-mq43 |
| Andrus Lake | 205 | 46.7 | -85.04 | 46.7 | 190 | Shane, Linda C. K.. Andrus Lake | 10.21233/n39q4k |
| Redstone Lake | 2050 | 67.25 | -152.6 | 67.25 | 914 | Brubaker, Linda Beck. Redstone Lake | 10.21233/n3hb4n |
| Reichow Pond | 2051 | 47.19 | -95.77 | 47.19 | 455 | McAndrews, John H.. Reichow Pond | 10.21233/n3cn00 |
| Minden Bog | 20512 | 43.6 | -82.86 | 43.6 | 239 | Booth, Robert K.. Minden Bog | 10.21233/tegf-sg62 |
| Lake Grinnell | 20515 | 41.1 | -74.64 | 41.1 | 170 | Yu, Zicheng C.; Zhao, Yan. Lake Grinnell | 10.21233/6beq-4462 |
| Reidel Lake | 2053 | 46.21 | -95.28 | 46.21 | 443 | Almquist, Heather R.. Reidel Lake | 10.21233/n34445 |
| Reindeer Lake | 2054 | 69.12 | -132.17 | 69.12 | NA | Spear, Ray W.. Reindeer Lake | 10.21233/n30f3n |
| Andy Lake | 206 | 64.65 | -128.08 | 64.65 | 1360 | Szeicz, Julian M.. Andy Lake | 10.21233/n35x18 |
| Eleanor Lake | 20609 | 52.11 | -119.3 | 52.11 | 677 | Gavin, Daniel G.. Eleanor Lake | 10.21233/2snx-0849 |
| Chesapeake Bay, Rhode River | 2061 | 38.89 | -76.39 | 38.89 | 0 | Willard, Debra A.. Chesapeake Bay, Rhode River | 10.21233/n33457 |
| Plan B Pond | 20613 | 42.42 | -111.78 | 42.42 | 2500 | Brunelle, Andrea R.; Lundeen, Zachary J.. Plan B Pond | 10.21233/8z94-4d70 |
| Bison Lake | 20616 | 39.77 | -107.35 | 39.77 | 3255 | Anderson, Lesleigh. Bison Lake | 10.21233/kdez-7x94 |
| Quag Pond | 20618 | 42.57 | -71.96 | 42.57 | 332 | Boose, Emery R.. Quag Pond | 10.21233/wbme-c638 |
| Rholl Lake | 2062 | 47.6 | -96.17 | 47.6 | NA | McAndrews, John H.. Rholl Lake | 10.21233/n3c95f |
| Little Bolton | 20620 | 42.42 | -71.59 | 42.42 | 99 | Foster, David R.. Little Bolton | 10.21233/pwtq-7709 |
| Snake Pond | 20627 | 42.56 | -72.02 | 42.56 | 282 | Foster, David R.. Snake Pond | 10.21233/vv51-xt27 |
| Rhule Fen | 2063 | 39.95 | -85.74 | 39.95 | 268 | Shane, Linda C. K.. Rhule Fen | 10.21233/n37m1s |
| Lake Pleasant | 20631 | 42.56 | -72.51 | 42.56 | 80 | Boose, Emery R.. Lake Pleasant | 10.21233/s3nw-wc82 |
| Pine Lake | 20643 | 52.09 | -113.44 | 52.09 | 890 | McAndrews, John H.. Pine Lake | 10.21233/8fr1-g832 |
| Lake JR01 | 20647 | 69.9 | -95.07 | 69.9 | 125 | Zabenskie, Susan. Lake JR01 | 10.21233/m1cw-m988 |
| Lake KR02 (unofficial name) | 20649 | 71.34 | -113.78 | 71.34 | 299 | Gajewski, Konrad J.; Peros, Matthew C.. Lake KR02 (unofficial name) | 10.21233/f8ve-pn66 |
| Rice Lake | 2065 | 48.01 | -101.54 | 48.01 | 620 | Grimm, Eric Christopher. Rice Lake | 10.21233/n3036b |
| Upper Fly Lake | 20651 | 61.02 | -138.09 | 61.02 | 1326 | Bunbury, Joan; Gajewski, Konrad J.. Upper Fly Lake | 10.21233/1agn-vg81 |
| Lake MB01 | 20653 | 69.81 | -112.08 | 69.81 | 297 | Gajewski, Konrad J.; Peros, Matthew C.. Lake MB01 | 10.21233/w4jw-z541 |
| Rice Lake | 2066 | 46.92 | -95.58 | 46.92 | 443 | McAndrews, John H.. Rice Lake | 10.21233/n3ff29 |
| Lake SL06 | 20676 | 68.59 | -91.89 | 68.59 | 243 | Gajewski, Konrad J.; Peros, Matthew C.. Lake SL06 | 10.21233/fh7f-2r88 |
| Patterson Lake | 20678 | 41.38 | -120.22 | 41.38 | 2754 | Minckley, Thomas A.. Patterson Lake | 10.21233/k6yn-0068 |
| R Lake | 2068 | 54.31 | -84.56 | 54.31 | 147 | McAndrews, John H.. R Lake | 10.21233/n35x7j |
| Crooked Lake | 20695 | 46.25 | -89.29 | 46.25 | 519 | Brugam, Richard Blair. Crooked Lake | 10.21233/pp56-r126 |
| Crooked Lake | 20697 | 46.25 | -89.29 | 46.25 | 519 | Brugam, Richard Blair. Crooked Lake | 10.21233/0rx5-7138 |
| Bolan Lake | 20758 | 42.02 | -123.46 | 42.02 | 1639 | Briles, Christy E.. Bolan Lake | 10.21233/spm6-6z67 |
| Angal Lake | 208 | 67.13 | -153.9 | 67.13 | 820 | Brubaker, Linda Beck. Angal Lake | 10.21233/n3bc8z |
| Drizzle Bog | 20836 | 53.94 | -132.11 | 53.94 | 62 | Huntley, Matthew J.. Drizzle Bog | 10.21233/cxqp-d831 |
| Purple Lake | 20838 | 38.07 | -111.57 | 38.07 | 3226 | Morris, Jesse L.. Purple Lake | 10.21233/p8ka-j092 |
| Screaming Lynx Lake | 20872 | 66.07 | -145.41 | 66.07 | 225 | Kelly, Ryan. Screaming Lynx Lake | 10.21233/cx5z-6m80 |
| Star Meadows | 20883 | 46.52 | -114.68 | 46.52 | 1109 | Herring, Erin M.. Star Meadows | 10.21233/8fsd-4z98 |
| Lac à l'Ange | 209 | 47.48 | -70.68 | 47.48 | 648 | Labelle, Claude; Larouche, Alayn C.; Richard, Pierre J. H.. Lac à l'Ange | 10.21233/n36k61 |
| East Glacier Lake | 20922 | 41.38 | -106.26 | 41.38 | 3282 | Mensing, Scott A.. East Glacier Lake | 10.21233/zsy8-y964 |
| Antelope Playa | 210 | 43.5 | -105.45 | 43.5 | 1450 | Markgraf, Vera. Antelope Playa | 10.21233/n32w2c |
| Corser Bog | 21314 | 60.53 | -145.45 | 60.53 | 42 | Nichols, Jonathan E.; Peteet, Dorothy M.. Corser Bog | 10.21233/n923-4y83 |
| Lac Triangle | 21319 | 48.71 | -65.41 | 48.71 | 465 | Richard, Pierre J. H.. Lac Triangle | 10.21233/gdgg-h674 |
| Graben Dome, Diamond Craters | 21334 | 43.09 | -118.75 | 43.09 | 1400 | Mehringer, Peter J., Jr.; Wigand, Peter E.. Graben Dome, Diamond Craters | 10.21233/g8p6-kh40 |
| Graben Dome, Diamond Craters | 21338 | 43.09 | -118.75 | 43.09 | 1400 | Mehringer, Peter J., Jr.; Wigand, Peter E.. Graben Dome, Diamond Craters | 10.21233/5fqr-cg86 |
| Graben Dome, Diamond Craters | 21342 | 43.09 | -118.75 | 43.09 | 1400 | Mehringer, Peter J., Jr.; Wigand, Peter E.. Graben Dome, Diamond Craters | 10.21233/thwb-xw11 |
| Graben Dome, Diamond Craters | 21349 | 43.09 | -118.75 | 43.09 | 1400 | Mehringer, Peter J., Jr.; Wigand, Peter E.. Graben Dome, Diamond Craters | 10.21233/qm83-5j64 |
| Graben Dome, Diamond Craters | 21353 | 43.09 | -118.75 | 43.09 | 1400 | Mehringer, Peter J., Jr.; Wigand, Peter E.. Graben Dome, Diamond Craters | 10.21233/gz9d-f068 |
| Graben Dome, Diamond Craters | 21357 | 43.09 | -118.75 | 43.09 | 1400 | Mehringer, Peter J., Jr.; Wigand, Peter E.. Graben Dome, Diamond Craters | 10.21233/4b21-yh43 |
| Graben Dome, Diamond Craters | 21361 | 43.09 | -118.75 | 43.09 | 1400 | Mehringer, Peter J., Jr.; Wigand, Peter E.. Graben Dome, Diamond Craters | 10.21233/t120-b258 |
| Graben Dome, Diamond Craters | 21365 | 43.09 | -118.75 | 43.09 | 1400 | Mehringer, Peter J., Jr.; Wigand, Peter E.. Graben Dome, Diamond Craters | 10.21233/nh8x-wg94 |
| Graben Dome, Diamond Craters | 21372 | 43.09 | -118.75 | 43.09 | 1400 | Mehringer, Peter J., Jr.; Wigand, Peter E.. Graben Dome, Diamond Craters | 10.21233/64yw-3z63 |
| Graben Dome, Diamond Craters | 21376 | 43.09 | -118.75 | 43.09 | 1400 | Mehringer, Peter J., Jr.; Wigand, Peter E.. Graben Dome, Diamond Craters | 10.21233/qwfb-5996 |
| Nolf Crater, Diamond Craters | 21383 | 43.11 | -118.8 | 43.11 | 1295 | Mehringer, Peter J., Jr.; Wigand, Peter E.. Nolf Crater, Diamond Craters | 10.21233/8270-v515 |
| Petit lac Bouchard | 21389 | 48.94 | -64.6 | 48.94 | 145 | Asnong, Hans; Richard, Pierre J. H.. Petit lac Bouchard | 10.21233/7mve-4z45 |
| Catlow Rim | 21393 | 42.56 | -118.93 | 42.56 | 1460 | Mehringer, Peter J., Jr.. Catlow Rim | 10.21233/y0b7-5b98 |
| Catlow Rim | 21396 | 42.56 | -118.93 | 42.56 | 1460 | Mehringer, Peter J., Jr.. Catlow Rim | 10.21233/qb7a-dg22 |
| Petit lac Bouchard | 21404 | 48.94 | -64.6 | 48.94 | 145 | Asnong, Hans; Richard, Pierre J. H.. Petit lac Bouchard | 10.21233/4y6f-s896 |
| Petit lac Bouchard | 21406 | 48.94 | -64.6 | 48.94 | 145 | Asnong, Hans; Richard, Pierre J. H.. Petit lac Bouchard | 10.21233/bba4-a935 |
| Newark Valley Pond | 21415 | 39.67 | -115.77 | 39.67 | 1750 | Mensing, Scott A.. Newark Valley Pond | 10.21233/tbhk-kw62 |
| Kingston Meadow | 21418 | 39.25 | -117.17 | 39.25 | 2400 | Mensing, Scott A.; Smith, Jeremy. Kingston Meadow | 10.21233/rwpj-e158 |
| Upper Squaw Lake | 21422 | 42.03 | -123.01 | 42.03 | 930 | Colombaroli, Daniele. Upper Squaw Lake | 10.21233/sg70-ew74 |
| Stoll Lake | 21577 | 44.97 | -77.29 | 44.97 | 303 | Gajewski, Konrad J.; Keizer, Peter S.. Stoll Lake | 10.21233/1627-0v53 |
| Tawny Pond | 21600 | 44.82 | -77.18 | 44.82 | 276 | Gajewski, Konrad J.; Keizer, Peter S.. Tawny Pond | 10.21233/dpfx-7555 |
| Hippa Lake | 21770 | 53.53 | -132.97 | 53.53 | 230 | Delepine, J. Michelle; Lacourse, Terri. Hippa Lake | 10.21233/qbkz-hz40 |
| Misty Lake | 21772 | 50.61 | -127.26 | 50.61 | 70 | Lacourse, Terri. Misty Lake | 10.21233/yxa5-7p09 |
| Port McNeill Bog | 21774 | 50.57 | -127.07 | 50.57 | 93 | Davies, Marissa A.; Lacourse, Terri. Port McNeill Bog | 10.21233/e2hw-ah76 |
| Roe Lake | 21788 | 48.78 | -123.3 | 48.78 | 100 | Lacourse, Terri; Lucas, Jennifer D.. Roe Lake | 10.21233/jnyr-4x96 |
| Horseshoe Lake | 21792 | 38.7 | -90.1 | 38.7 | 27 | Muñoz, Samuel E.. Horseshoe Lake | 10.21233/eqv0-5067 |
| Grassy Lake | 21800 | 37.43 | -89.38 | 37.43 | 104 | Muñoz, Samuel E.; Williams, John W.. Grassy Lake | 10.21233/4qj1-g728 |
| Sunwapta Pass Bog 6 | 21822 | 52.22 | -117.19 | 52.22 | 2045 | Beaudoin, Alwynne B.. Sunwapta Pass Bog 6 | 10.21233/xaae-ck65 |
| Sunwapta Pass Bog 1 | 21826 | 52.21 | -117.18 | 52.21 | 2045 | Beaudoin, Alwynne B.. Sunwapta Pass Bog 1 | 10.21233/accq-vb59 |
| Lake AT01 | 21830 | 53.28 | -84.21 | 53.28 | 115 | Davis, Anthony M.; Finkelstein, Sarah A.; Friel, Charlotte E.. Lake AT01 | 10.21233/34yd-xm12 |
| Mission Cross Bog | 21844 | 41.78 | -115.48 | 41.78 | 2424 | Allan, Marie. Mission Cross Bog | 10.21233/m6at-pw62 |
| ODP Hole 893A | 21893 | 34.28 | -120.06 | 34.28 | 0 | Roark, E. Brendan. ODP Hole 893A | 10.21233/hvvv-sy31 |
| Lac des Atocas | 219 | 45.54 | -73.31 | 45.54 | 114 | Gauthier, Robert; Larouche, Alayn C.; Richard, Pierre J. H.. Lac des Atocas | 10.21233/n31w22 |
| Axe Lake | 221 | 45.38 | -79.51 | 45.38 | 323 | McAndrews, John H.. Axe Lake | 10.21233/n3h68s |
| Cienega de San Bernadino | 22119 | 31.32 | -109.26 | 31.32 | 1118 | Blissett, Shawn D.. San Bernardino Cienega | 10.21233/s4k3-4429 |
| Ochlockonee River | 22238 | 29.99 | -84.45 | 29.99 | 0 | Chen, Zi-Qiang. Ochlockonee River | 10.21233/y6je-9a17 |
| Quidi Vidi Lake | 22244 | 47.58 | -52.69 | 47.58 | 13 | Christopher, Terry. Quidi Vidi Lake | 10.21233/qhkq-9149 |
| Bad Medicine Lake | 223 | 47.12 | -95.4 | 47.12 | 487 | McAndrews, John H.. Bad Medicine Lake | 10.21233/n37q4z |
| Round Pond | 22376 | 42.17 | -72.71 | 42.17 | 260 | Clark, Kennedy H.. Round Pond | 10.21233/mczv-f712 |
| Upper Susitna River Valley | 22379 | 63.19 | -147.6 | 63.19 | 850 | Blong, John C.. Upper Susitna River Valley | 10.21233/zdxr-5h10 |
| Doolittle Ranch Meadow | 22397 | 39.68 | -105.6 | 39.68 | 2975 | Doerner, James P.. Doolittle Ranch Meadow | 10.21233/fgen-7074 |
| Baird Inlet [Rock Basin Lake] | 224 | 78.49 | -76.78 | 78.49 | 295 | Hyvärinen, Hannu. Baird Inlet [Rock Basin Lake] | 10.21233/n3410m |
| Echo Lake | 22400 | 39.66 | -105.6 | 39.66 | 3230 | Doerner, James P.. Echo Lake | 10.21233/hnsc-1p36 |
| Breitenbush Lake | 22407 | 44.77 | -121.78 | 44.77 | NA | Minckley, Thomas A.. Breitenbush Lake | 10.21233/ha3q-ts93 |
| L'Anse aux Meadows Road Cut Bog | 2262 | 51.6 | -55.53 | 51.6 | 0 | McAndrews, John H.. L'Anse aux Meadows Road Cut Bog | 10.21233/n37v0t |
| Lac à Robin | 2265 | 48.05 | -65.27 | 48.05 | 50 | Bail, P.; Jetté, Hélène; Labelle, Claude; Larouche, Alayn C.; Richard, Pierre J. H.. Lac à Robin | 10.21233/n38h3t |
| Robinson's Pond | 2266 | 48.26 | -58.8 | 48.26 | 32 | McAndrews, John H.. Robinson's Pond | 10.21233/n34t0j |
| Lac des Roches Moutonnées | 2267 | 56.77 | -64.82 | 56.77 | 410 | McAndrews, John H.. Lac des Roches Moutonnées | 10.21233/n3108c |
| Rogers Lake | 2270 | 41.35 | -72.3 | 41.35 | 11 | Davis, Margaret B.. Rogers Lake | 10.21233/n3bn0p |
| Balsam Meadow | 228 | 37.16 | -119.25 | 37.16 | 2015 | Davis, Owen K.. Balsam Meadow | 10.21233/n34p4p |
| Lac Romer | 2286 | 45.96 | -73.33 | 45.96 | 18 | Comtois, Paul G.. Lac Romer | 10.21233/n3df20 |
| Rose Swamp | 2287 | 44.18 | -79.44 | 44.18 | 228 | McAndrews, John H.. Rose Swamp | 10.21233/n38n02 |
| Rose Lake | 2289 | 41.92 | -77.92 | 41.92 | 690 | Cotter, James F. P.. Rose Lake | 10.21233/n31460 |
| Rossburg Bog | 2290 | 46.58 | -93.6 | 46.58 | 372 | Wright, Herbert E., Jr.. Rossburg Bog | 10.21233/n3995t |
| Ross Pond | 2292 | 43.92 | -69.41 | 43.92 | 37 | Kellogg, Douglas C.. Ross Pond | 10.21233/n31t10 |
| Leonora Curtin | 22948 | 35.57 | -106.11 | 35.57 | 1850 | Edwards, Kyle W.. Leonora Curtin | 10.21233/2gpe-6009 |
| Long Lake | 22969 | 41.5 | -106.37 | 41.5 | 2700 | Carter, Vachel A.; Minckley, Thomas A.. Long Lake | 10.21233/bppw-6791 |
| Lake RS29 | 2297 | 73.13 | -95.28 | 73.13 | 180 | Gajewski, Konrad J.. Lake RS29 | 10.21233/n30472 |
| Lake RS36 | 2303 | 72.58 | -95.07 | 72.58 | 160 | Gajewski, Konrad J.. Lake RS36 | 10.21233/n36r1v |
| Ruby Lake | 2309 | 45.28 | -91.46 | 45.28 | 335 | Winkler, Marjorie Green. Ruby Lake | 10.21233/n3f76r |
| Ruppert Lake | 2311 | 67.07 | -154.23 | 67.07 | 210 | Brubaker, Linda Beck. Ruppert Lake | 10.21233/n35r2x |
| Rutz Lake | 2314 | 44.87 | -93.86 | 44.87 | 314 | Waddington, Jean Constance Bassett. Rutz Lake | 10.21233/n36d5x |
| Ryerse Lake | 2318 | 46.13 | -85.18 | 46.13 | 259 | Futyma, Richard. Ryerse Lake | 10.21233/n38j35 |
| Lac au Sable | 2319 | 51.4 | -66.22 | 51.4 | 530 | King, George A.. Lac au Sable | 10.21233/n34r0v |
| Barchampe Lake | 232 | 30.62 | -83.25 | 30.62 | 34 | Grimm, Eric Christopher. Barchampe Lake | 10.21233/n3bh7z |
| Sagehen Marsh | 2320 | 37.47 | -108.5 | 37.47 | 2085 | Petersen, Kenneth L.. Sagehen Marsh | 10.21233/n3118q |
| Sakana Lake | 2324 | 67.43 | -147.85 | 67.43 | 640 | Brubaker, Linda Beck. Sakana Lake | 10.21233/n3h182 |
| Lac à Sam | 2332 | 46.65 | -72.98 | 46.65 | 240 | Larouche, Alayn C.; Occhietti, S.; Richard, Pierre J. H.. Lac à Sam | 10.21233/n30q1n |
| Sandy Cove Pond | 2337 | 54.4 | -57.72 | 54.4 | 100 | Jordan, Richard H.. Sandy Cove Pond | 10.21233/n32t9b |
| San Joaquin Marsh | 2338 | 33.66 | -117.86 | 33.66 | 2 | Davis, Owen K.. San Joaquin Marsh | 10.21233/n3c09v |
| Barrett Lake | 234 | 37.6 | -119.01 | 37.6 | 2816 | Anderson, R. Scott. Barrett Lake | 10.21233/n36q51 |
| San Agustin Plains | 2340 | 33.87 | -108.25 | 33.87 | 2069 | Markgraf, Vera. San Agustin Plains | 10.21233/n33h38 |
| Sarnia Elk Site Section | 2341 | 42.98 | -82.32 | 42.98 | 185 | McAndrews, John H.. Sarnia Elk Site Section | 10.21233/n3jv10 |
| Lac Manitou | 2342 | 46.06 | -74.47 | 46.06 | 454 | Gangloff, P.; Larouche, Alayn C.; Richard, Pierre J. H.; Savoie, Louise. Lac Manitou | 10.21233/n3f172 |
| Lac aux Quenouilles | 2343 | 46.17 | -74.4 | 46.17 | 403 | Gangloff, P.; Larouche, Alayn C.; Richard, Pierre J. H.; Savoie, Louise. Lac aux Quenouilles | 10.21233/n39b55 |
| Sierra Bacha 1 | 2345 | 29.77 | -112.58 | 29.77 | 220 | Anderson, R. Scott. Sierra Bacha 1 | 10.21233/n31v0z |
| Sierra Bacha 3 | 2346 | 29.82 | -112.63 | 29.82 | 180 | Anderson, R. Scott. Sierra Bacha 3 | 10.21233/n3b09j |
| SC1 Pond | 2348 | 54.42 | -131.91 | 54.42 | 550 | Pellatt, Marlow G.. SC1 Pond | 10.21233/n32h3z |
| Scott Lake | 2349 | 27.97 | -81.94 | 27.97 | 51 | Watts, William A.. Scott Lake | 10.21233/n3ht9c |
| Barry Lake | 235 | 44.3 | -77.92 | 44.3 | 167 | McAndrews, John H.. Barry Lake | 10.21233/n3311p |
| Screaming Yellowlegs Pond | 2351 | 67.58 | -151.42 | 67.58 | 650 | Brubaker, Linda Beck. Screaming Yellowlegs Pond | 10.21233/n38b4g |
| Seagull Lake | 2352 | 68.27 | -145.22 | 68.27 | 637 | Brubaker, Linda Beck. Seagull Lake | 10.21233/n34n2k |
| Kettle's Lake [Second Lake] | 2353 | 44.84 | -79.98 | 44.84 | 196 | McAndrews, John H.. Kettle's Lake [Second Lake] | 10.21233/n30t9q |
| Sedivy Lake | 2354 | 47.21 | -95.83 | 47.21 | 405 | McAndrews, John H.. Sedivy Lake | 10.21233/n39097 |
| Seidel | 2355 | 44.45 | -87.52 | 44.45 | 211 | Waddington, Jean Constance Bassett. Seidel | 10.21233/n3595k |
| Baseball Bog | 236 | 47.23 | -79.78 | 47.23 | 292 | McAndrews, John H.. Baseball Bog | 10.21233/n3c59k |
| LD Lake | 2367 | 50.14 | -67.13 | 50.14 | 122 | Mott, Robert J.. LD Lake | 10.21233/n36f4w |
| Basin Pond | 237 | 44.47 | -70.05 | 44.47 | 124 | Gajewski, Konrad J.. Basin Pond | 10.21233/n37g7p |
| Sewell Lake | 2372 | 49.84 | -99.58 | 49.84 | 370 | Ritchie, James C.. Sewell Lake | 10.21233/n3jn1x |
| Saint-Francois de Sales | 2373 | 48.29 | -72.15 | 48.29 | 358 | Larouche, Alayn C.; Richard, Pierre J. H.. Saint-Francois de Sales | 10.21233/n3dz0d |
| Shagawa Lake | 2375 | 47.92 | -91.87 | 47.92 | 492 | Bradbury, J. Platt. Shagawa Lake | 10.21233/n35f4k |
| Shangri-La Bog | 2376 | 53.27 | -132.41 | 53.27 | 595 | Pellatt, Marlow G.. Shangri-La Bog | 10.21233/n31n2n |
| Shaws Bog | 2377 | 45.02 | -64.18 | 45.02 | 30 | Hadden, Kathleen A.. Shaws Bog | 10.21233/n39w96 |
| Mont Shefford | 2378 | 45.36 | -72.58 | 45.36 | 282 | Larouche, Alayn C.; Richard, Pierre J. H.. Mont Shefford | 10.21233/n3637k |
| Lac Bastien | 238 | 46.4 | -78.92 | 46.4 | 305 | Bennett, Keith D.. Lac Bastien | 10.21233/n33p4c |
| Sherd Lake | 2381 | 44.27 | -107.01 | 44.27 | 2665 | Baker, Richard G.. Sherd Lake | 10.21233/n3hr08 |
| Shouldice Lake | 2382 | 45.15 | -81.42 | 45.15 | 206 | McAndrews, John H.. Shouldice Lake | 10.21233/n3cx7d |
| Silver Lake | 2383 | 44.9 | -94.2 | 44.9 | 328 | McAndrews, John H.. Silver Lake | 10.21233/n38766 |
| Silver Lake | 2384 | 44.56 | -63.64 | 44.56 | 69 | Livingstone, Daniel A.. Silver Lake | 10.21233/n34f3w |
| Silver Lake | 2385 | 40.35 | -83.81 | 40.35 | 332 | Ogden, James Gordon, III. Silver Lake | 10.21233/n30r10 |
| Battle Ground Lake | 239 | 45.8 | -122.49 | 45.8 | 155 | Whitlock, Cathy. Battle Ground Lake | 10.21233/n3002s |
| Sinkhole Pond | 2391 | 43.97 | -70.35 | 43.97 | 95 | Jacobson, G.. Sinkhole Pond | 10.21233/n3bx8g |
| Sioux Pond | 2393 | 49.93 | -91.57 | 49.93 | 410 | Björck, Svante. Sioux Pond | 10.21233/9yf5-e111 |
| Siseebakwet South | 2394 | 47.13 | -93.68 | 47.13 | 436 | Cushing, Edward J., Jr.. Siseebakwet South | 10.21233/n3cq2f |
| Alexander Lake | 24 | 53.33 | -60.58 | 53.33 | 143 | Jordan, Richard H.. Alexander Lake | 10.21233/n3f97t |
| Battaglia Bog | 240 | 41.14 | -81.33 | 41.14 | 335 | Shane, Linda C. K.. Battaglia Bog | 10.21233/n3f986 |
| Black Bass Lake | 241 | 46.13 | -93.7 | 46.13 | 394 | McAndrews, John H.. Black Bass Lake | 10.21233/n39h68 |
| North Flat Lake | 24354 | 53.61 | -106.5 | 53.61 | 522 | Hart, Catherine Leigh; McAndrews, John H.. North Flat Lake | 10.21233/7jm9-qy50 |
| Beach Lake | 244 | 65.22 | -127.05 | 65.22 | NA | McAndrews, John H.. Beach Lake | 10.21233/n3b606 |
| L03 | 24425 | 54.6 | -105.96 | 54.6 | 635 | McAndrews, John H.. L03 | 10.21233/pbbv-8y50 |
| Bear Bog | 245 | 47.18 | -80.16 | 47.18 | 304 | McAndrews, John H.. Bear Bog | 10.21233/n36g60 |
| Beaver Lake | 246 | 44.18 | -107.26 | 44.18 | 2561 | Baker, Richard G.. Beaver Lake | 10.21233/n32p5f |
| Rondeau Bay (R34) | 24608 | 42.27 | -81.87 | 42.27 | 172 | Finkelstein, Sarah A.. Rondeau Bay (R34) | 10.21233/ym2y-2794 |
| Trinity River bayhead | 24665 | 29.77 | -94.71 | 29.77 | 0 | Anderson, John B.. Trinity River bayhead | 10.21233/2rhp-py68 |
| Trinity River Valley | 24686 | 29.67 | -94.78 | 29.67 | 0 | Anderson, John B.. Trinity River Valley | 10.21233/cd5z-fw62 |
| Corpus Christi Bay | 24725 | 27.79 | -97.34 | 27.79 | -10 | Anderson, John B.; Rodriguez, Antonio B.; Simms, Alexander R.; Taviani, Marco. Corpus Christi Bay | 10.21233/mv6c-3540 |
| Sleet Lake | 2476 | 69.28 | -133.58 | 69.28 | NA | Spear, Ray W.. Sleet Lake | 10.21233/n3cj33 |
| Beckman Lake | 249 | 45.42 | -93.18 | 45.42 | 278 | Swain, Patricia C.. Beckman Lake | 10.21233/n38h6z |
| Alexis Lake | 25 | 52.52 | -57.03 | 52.52 | 200 | Lamb, Henry F.. Alexis Lake | 10.21233/n39m4j |
| Beef Pasture | 250 | 37.47 | -108.16 | 37.47 | 3060 | Petersen, Kenneth L.. Beef Pasture | 10.21233/n34t3p |
| St. Shotts | 25147 | 46.65 | -53.6 | 46.65 | 35 | Irwin, Theodore Emmanuel. St. Shotts | 10.21233/7trt-h265 |
| St. Shotts | 25186 | 46.65 | -53.6 | 46.65 | 35 | Irwin, Theodore Emmanuel. St. Shotts | 10.21233/m4nq-s295 |
| St. Shotts | 25188 | 46.65 | -53.6 | 46.65 | 35 | Irwin, Theodore Emmanuel. St. Shotts | 10.21233/9dch-0a13 |
| St. Shotts | 25190 | 46.65 | -53.6 | 46.65 | 35 | Irwin, Theodore Emmanuel. St. Shotts | 10.21233/f2a8-qv17 |
| St. Shotts | 25192 | 46.65 | -53.6 | 46.65 | 35 | Irwin, Theodore Emmanuel. St. Shotts | 10.21233/vwsh-v513 |
| St. Shotts | 25207 | 46.65 | -53.6 | 46.65 | 35 | Irwin, Theodore Emmanuel. St. Shotts | 10.21233/ydv6-qy75 |
| St. Shotts | 25209 | 46.65 | -53.6 | 46.65 | 35 | Irwin, Theodore Emmanuel. St. Shotts | 10.21233/8npt-ww83 |
| St. Shotts | 25268 | 46.65 | -53.6 | 46.65 | 35 | Irwin, Theodore Emmanuel. St. Shotts | 10.21233/n1n7-ya12 |
| Bell's Lake | 253 | 65.02 | -127.48 | 65.02 | 580 | Szeicz, Julian M.. Bell's Lake | 10.21233/n35g6p |
| Otter Lake | 25306 | 43.22 | -83.46 | 43.22 | 260 | Kettle, Jennifer M.. Otter Lake | 10.21233/qxc4-4d67 |
| Leaky Lake | 25337 | 52.58 | -63.54 | 52.58 | 567 | King, George A.. Leaky Lake | 10.21233/sf42-tg42 |
| Waccamaw River, Turkey Creek Oligohaline Marsh | 25340 | 33.35 | -79.34 | 33.35 | 0 | Bernhardt, Christopher E.; Jones, Miriam C.; Krauss, Ken W.; Noe, Gregory B.. Waccamaw River, Turkey Creek Oligohaline Marsh | 10.21233/fssx-my06 |
| Waccamaw River, Turkey Creek, Heavily Salt Impacted Swamp | 25349 | 33.34 | -79.34 | 33.34 | 0 | Bernhardt, Christopher E.; Jones, Miriam C.; Krauss, Ken W.; Noe, Gregory B.. Waccamaw River, Turkey Creek, Heavily Salt Impacted Swamp | 10.21233/860r-wq86 |
| Waccamaw River, Butler Island, Moderately Salt Impacted | 25368 | 33.42 | -79.21 | 33.42 | 0 | Bernhardt, Christopher E.; Jones, Miriam C.; Krauss, Ken W.; Noe, Gregory B.. Waccamaw River, Butler Island, Moderately Salt Impacted | 10.21233/gq49-ep38 |
| Pine Lake | 25388 | 51.14 | -69.29 | 51.14 | 460 | King, George A.. Pine Lake | 10.21233/1xwt-r398 |
| Belmont Bog | 254 | 42.25 | -77.92 | 42.25 | 497 | Spear, Ray W.. Belmont Bog | 10.21233/n31s4s |
| Lignumvitae Key | 25491 | 24.9 | -80.7 | 24.9 | 1 | Kaplan, Samantha W.. Lignumvitae Key | 10.21233/h558-zp19 |
| East Whitewater Bay | 25514 | 25.27 | -80.91 | 25.27 | 0 | Kaplan, Samantha W.. East Whitewater Bay | 10.21233/2rha-px75 |
| Beef Pasture | 25551 | 37.47 | -108.16 | 37.47 | 3060 | Wright, Aaron M.. Beef Pasture | 10.21233/gjvj-6s89 |
| Cotton Key | 25605 | 24.96 | -80.63 | 24.96 | 0 | Kaplan, Samantha W.. Cotton Key | 10.21233/btdc-v518 |
| Water Conservation Area 3B | 25609 | 25.82 | -80.57 | 25.82 | 3 | Kaplan, Samantha W.. Water Conservation Area 3B | 10.21233/1j4v-st31 |
| Levee L67A | 25683 | 25.94 | -80.6 | 25.94 | 3 | Kaplan, Samantha W.. Levee L67A | 10.21233/02c4-8x80 |
| Rocky Glades | 25749 | 25.61 | -80.74 | 25.61 | 2 | Kaplan, Samantha W.. Rocky Glades | 10.21233/99w6-1q74 |
| Slough Creek Pond | 2576 | 44.93 | -110.35 | 44.93 | 1884 | Whitlock, Cathy. Slough Creek Pond | 10.21233/n3fv12 |
| Slow River | 2577 | 63.03 | -100.75 | 63.03 | 265 | Kay, Paul A.. Slow River | 10.21233/n3b19w |
| Smoot Lake Bog | 2578 | 40.21 | -82.45 | 40.21 | 292 | Shane, Linda C. K.. Smoot Lake Bog | 10.21233/n36b6m |
| Bereziuk | 258 | 54.05 | -76.12 | 54.05 | 205 | Larouche, Alayn C.; Richard, Pierre J. H.. Bereziuk | 10.21233/n37m4x |
| Snowshoe Lake | 2580 | 57.45 | -120.67 | 57.45 | 900 | MacDonald, Glen. Snowshoe Lake | 10.21233/n3bt25 |
| Cobweb Swamp (Canal Fill Core) | 25806 | 17.94 | -88.37 | 17.94 | 8 | Jones, John Glendon. Cobweb Swamp (Canal Fill Core) | 10.21233/c8p3-7n90 |
| Solum Lake | 2581 | 46.66 | -96.25 | 46.66 | 397 | McAndrews, John H.. Solum Lake | 10.21233/n37087 |
| South Stanchfield Lake | 2584 | 45.73 | -93.47 | 45.73 | 293 | McAndrews, John H.. South Stanchfield Lake | 10.21233/n3jn29 |
| Spectacle Lake | 2585 | 45.57 | -93.41 | 45.57 | 283 | McAndrews, John H.. Spectacle Lake | 10.21233/n3dv0c |
| Spirit Lake | 2586 | 46.47 | -86.96 | 46.47 | 203 | Davis, Margaret B.; Woods, Kerry D.. Spirit Lake | 10.21233/n3947v |
| Splains Gulch | 2587 | 38.83 | -107.07 | 38.83 | 3150 | Fall, Patricia Lynn. Splains Gulch | 10.21233/n35b4j |
| Splains Lake | 2588 | 38.83 | -107.08 | 38.83 | 3165 | Fall, Patricia Lynn. Splains Lake | 10.21233/n31n31 |
| Spring Lake | 2590 | 55.51 | -119.58 | 55.51 | 835 | White, James M.. Spring Lake | 10.21233/n36099 |
| Spring Lake | 2591 | 41.67 | -76.35 | 41.67 | 342 | Nickmann, Rudy J.. Spring Lake | 10.21233/n3295n |
| Spruce Pond | 2593 | 41.24 | -74.18 | 41.24 | 223 | Maenza-Gmelch, Terryanne E.. Spruce Pond | 10.21233/n3cv1f |
| Stages Pond | 2598 | 39.67 | -82.94 | 39.67 | 212 | Shane, Linda C. K.. Stages Pond | 10.21233/n35391 |
| Starkweather Pond | 2599 | 37.66 | -119.07 | 37.66 | 2438 | Anderson, R. Scott. Starkweather Pond | 10.21233/n3196q |
| Berry Pond | 260 | 42.5 | -73.32 | 42.5 | 600 | Whitehead, Donald R.. Berry Pond | 10.21233/n3040d |
| St. Catherines Lake | 2600 | 44.63 | -93.43 | 44.63 | 287 | McAndrews, John H.. St. Catherines Lake | 10.21233/n3gn2p |
| Stone Lake | 2605 | 45.4 | -93.52 | 45.4 | NA | McAndrews, John H.. Stone Lake | 10.21233/n37t1v |
| Stone Lake Tamarack Swamp | 2607 | 44.89 | -93.69 | 44.89 | 288 | Swain, Patricia C.. Stone Lake Tamarack Swamp | 10.21233/n30d52 |
| Stotzel-Leis Site | 2609 | 40.22 | -84.69 | 40.22 | 309 | Shane, Linda C. K.. Stotzel-Leis Site | 10.21233/n39x9j |
| Sugarloaf Pond | 2610 | 47.62 | -52.67 | 47.62 | 100 | Macpherson, Joyce B.. Sugarloaf Pond | 10.21233/n3647x |
| Sulphur Lake | 2611 | 60.95 | -137.96 | 60.95 | 847 | Lacourse, Terri. Sulphur Lake | 10.21233/n32f51 |
| Sunfish Lake | 2613 | 44.87 | -93.1 | 44.87 | NA | McAndrews, John H.. Sunfish Lake | 10.21233/n36x1k |
| Surprise Lake | 2615 | 49.32 | -122.56 | 49.32 | 540 | Mathewes, Rolf W.. Surprise Lake | 10.21233/n3jf40 |
| Sutherland Pond | 2617 | 41.39 | -74.04 | 41.39 | 380 | Maenza-Gmelch, Terryanne E.. Sutherland Pond | 10.21233/n38x8v |
| Swamp Lake | 2619 | 37.95 | -119.82 | 37.95 | 1554 | Anderson, R. Scott. Swamp Lake | 10.21233/n31f4b |
| Swan Lake | 2620 | 41.72 | -102.5 | 41.72 | 1164 | Wright, Herbert E., Jr.. Swan Lake | 10.21233/a7g7-e649 |
| Swartswood Lake | 2621 | 41.07 | -74.84 | 41.07 | 150 | Russell Southgate, Emily W. B.. Swartswood Lake | 10.21233/n35x0w |
| Sweet Little Lake | 2622 | 67.65 | -132.02 | 67.65 | NA | Ritchie, James C.. Sweet Little Lake | 10.21233/n32393 |
| Szabo Pond | 2623 | 40.4 | -74.48 | 40.4 | 29 | Watts, William A.. Szabo Pond | 10.21233/n3hf52 |
| Tamarack Creek | 2624 | 44.15 | -91.45 | 44.15 | 244 | Davis, Anthony M.. Tamarack Creek | 10.21233/n3cr2s |
| Tangle Lakes | 2625 | 63.03 | -146.06 | 63.03 | NA | Ager, Thomas A.. Tangle Lakes | 10.21233/n37x9x |
| Tannersville Bog | 2626 | 41.04 | -75.26 | 41.04 | 277 | Watts, William A.. Tannersville Bog | 10.21233/n3477b |
| Williams Street Bog | 2628 | 41.9 | -71.07 | 41.9 | 5 | Davis, Margaret B.. Williams Street Bog | 10.21233/n38q3w |
| Taupawshas Bog | 2629 | 41.27 | -70.06 | 41.27 | 14 | Dunwiddie, Peter W.. Taupawshas Bog | 10.21233/n34x1z |
| Taylor Creek Site 2 | 2630 | 25.21 | -80.64 | 25.21 | 5 | Willard, Debra A.. Taylor Creek Site 2 | 10.21233/n3168f |
| Taylor Lake | 2631 | 46.1 | -123.91 | 46.1 | 4 | Long, Colin James. Taylor Lake | 10.21233/n3gj2n |
| Quamichan Lake | 26313 | 48.8 | -123.66 | 48.8 | 33 | McCoy, Marian M.. Quamichan Lake | 10.21233/69t7-p943 |
| Florence Lake | 26315 | 48.46 | -123.51 | 48.46 | 81 | McCoy, Marian M.. Florence Lake | 10.21233/62sj-zk58 |
| Taylor Slough Site 15 | 2632 | 25.2 | -80.69 | 25.2 | 5 | Willard, Debra A.. Taylor Slough Site 15 | 10.21233/n3br0q |
| Taylor Slough Site 7 | 2633 | 25.29 | -80.65 | 25.29 | 5 | Willard, Debra A.. Taylor Slough Site 7 | 10.21233/n3719z |
| Telegraph Creek | 2634 | 46.53 | -112.4 | 46.53 | 2130 | Brant, Lynn A.. Telegraph Creek | 10.21233/n3376n |
| Ten Lakes | 2636 | 37.9 | -119.53 | 37.9 | 2743 | Anderson, R. Scott. Ten Lakes | 10.21233/n37q3k |
| Ten Mile Lake | 2637 | 63.07 | -145.7 | 63.07 | 1000 | Anderson, Patricia M.. Ten Mile Lake | 10.21233/n33x21 |
| Quallen Lake [Terhell Pond] | 2638 | 47.19 | -95.79 | 47.19 | 448 | McAndrews, John H.. Quallen Lake [Terhell Pond] | 10.21233/n3067r |
| Petit Lac Terrien | 2639 | 46.58 | -70.62 | 46.58 | 404 | Mott, Robert J.. Petit Lac Terrien | 10.21233/n3fj43 |
| Thompson Pond | 2640 | 47.19 | -96.09 | 47.19 | 368 | McAndrews, John H.. Thompson Pond | 10.21233/n39r25 |
| Tiinkdhul Lake | 2642 | 66.58 | -143.15 | 66.58 | 189 | Anderson, Patricia M.. Tiinkdhul Lake | 10.21233/n3277q |
| Tioga Pass Pond | 2644 | 37.91 | -119.26 | 37.91 | 3018 | Anderson, R. Scott. Tioga Pass Pond | 10.21233/n36q38 |
| Titicut Swamp | 2645 | 41.95 | -71.03 | 41.95 | 20 | Nelson, Sheldon N.. Titicut Swamp | 10.21233/n33109 |
| Thompson Landing | 2646 | 63.07 | -110.79 | 63.07 | 180 | Nichols, Harvey. Thompson Landing | 10.21233/n3jb4z |
| Toboggan Lake | 2647 | 50.82 | -114.6 | 50.82 | 1480 | MacDonald, Glen. Toboggan Lake | 10.21233/n3dj21 |
| Toenjes Lake | 2648 | 45.41 | -93.98 | 45.41 | NA | McAndrews, John H.. Toenjes Lake | 10.21233/n38v1h |
| Tonawa Lake | 2651 | 44.85 | -77.17 | 44.85 | 274 | McAndrews, John H.. Tonawa Lake | 10.21233/n39h5w |
| Tonquin Creek | 2652 | 52.73 | -118.37 | 52.73 | 1935 | Kearney, Michael S.. Tonquin Creek | 10.21233/n35q4b |
| Lac à la Tortue | 2654 | 45.55 | -73.32 | 45.55 | 137 | Gauthier, Robert. Lac à la Tortue | 10.21233/n3hb6d |
| Lake 239 | 26606 | 49.66 | -93.72 | 49.66 | 387 | Moos, Melissa T.. Lake 239 | 10.21233/2j46-gn50 |
| Tuktoyaktuk 5 | 2661 | 69.05 | -133.45 | 69.05 | 60 | Ritchie, James C.. Tuktoyaktuk 5 | 10.21233/n37v16 |
| Lake Tulane | 2663 | 27.59 | -81.5 | 27.59 | 32 | Grimm, Eric Christopher; Hansen, Barbara C. S.; Watts, William A.. Lake Tulane | 10.21233/n30b5c |
| St. Jones River (SJB6) | 26673 | 39.08 | -75.44 | 39.08 | -3 | Moskalski, Susanne M.. St. Jones River (SJB6) | 10.21233/hsvy-3522 |
| St. Jones River (SJC6) | 26675 | 39.09 | -75.45 | 39.09 | -3 | Moskalski, Susanne M.. St. Jones River (SJC6) | 10.21233/sdmg-pr04 |
| Tunturi Lake | 2669 | 55.02 | -67.5 | 55.02 | 610 | Stravers, Loreen K. Stegeman. Tunturi Lake | 10.21233/n36v0h |
| Banks Island 74MS11 | 267 | 71.75 | -124.27 | 71.75 | 30 | Gajewski, Konrad J.. Banks Island 74MS11 | 10.21233/n32t32 |
| Lac Turcotte | 2671 | 49.16 | -65.76 | 49.16 | 447 | Labelle, Claude; Larouche, Alayn C.; Richard, Pierre J. H.. Lac Turcotte | 10.21233/n3c976 |
| Tuskegee Pond | 2673 | 35.58 | -84.21 | 35.58 | 240 | Delcourt, Paul A.. Tuskegee Pond | 10.21233/n33t1m |
| Banks Island 74MS12 | 268 | 72.37 | -119.83 | 72.37 | 220 | Gajewski, Konrad J.. Banks Island 74MS12 | 10.21233/n3c31v |
| Banks Island 74MS15 | 269 | 73.53 | -120.22 | 73.53 | 120 | Gajewski, Konrad J.. Banks Island 74MS15 | 10.21233/n37880 |
| Aliuk Pond | 27 | 54.58 | -57.37 | 54.58 | 25 | Jordan, Richard H.. Aliuk Pond | 10.21233/n35t17 |
| Big John Pond | 272 | 47.56 | -94.97 | 47.56 | 421 | Almendinger, John C.. Big John Pond | 10.21233/n3jx1p |
| Big Pond | 274 | 39.77 | -78.55 | 39.77 | 634 | Watts, William A.. Big Pond | 10.21233/n3f39h |
| Billy's Lake | 275 | 46.27 | -94.55 | 46.27 | 383 | Jacobson, G.. Billy's Lake | 10.21233/n39d67 |
| Bishops Falls | 276 | 48.94 | -55.51 | 48.94 | 75 | Macpherson, Joyce B.. Bishops Falls | 10.21233/n35m49 |
| Blacktail Pond | 279 | 44.96 | -110.6 | 44.96 | 2012 | Gennett, Judith Ann. Blacktail Pond | 10.21233/n3b305 |
| Blandin Pond | 280 | 47.13 | -93.67 | 47.13 | 468 | Cushing, Edward J., Jr.. Blandin Pond | 10.21233/n36892 |
| BL-Tombigbee | 281 | 33.56 | -88.47 | 33.56 | 49 | Whitehead, Donald R.. BL-Tombigbee | 10.21233/n32k5d |
| Blackhoof Site | 282 | 46.5 | -92.57 | 46.5 | 328 | Wright, Herbert E., Jr.. Blackhoof Site | 10.21233/n3hx34 |
| Blue Mounds Creek | 287 | 43.08 | -89.87 | 43.08 | 335 | Davis, Anthony M.. Blue Mounds Creek | 10.21233/n30x23 |
| Twin Lakes (CA:British Columbia) | 2879 | 50.79 | -116.36 | 50.79 | 1100 | McAndrews, John H.. Twin Lakes (CA:British Columbia) | 10.21233/n3320n |
| Twin Lakes | 2880 | 37.47 | -108.1 | 37.47 | 3290 | Petersen, Kenneth L.. Twin Lakes | 10.21233/n3zb6f |
| Twin Lakes | 2881 | 45.85 | -93.17 | 45.85 | NA | McAndrews, John H.. Twin Lakes | 10.21233/n3tj5w |
| Tyrrell Lake | 2882 | 66.05 | -135.66 | 66.05 | 660 | Ritchie, James C.. Tyrrell Lake | 10.21233/n3pv17 |
| Unknown Pond | 2886 | 45.6 | -70.63 | 45.6 | 489 | Mott, Robert J.. Unknown Pond | 10.21233/n39j4v |
| Upper Graven Lake | 2888 | 46.18 | -95.31 | 46.18 | 446 | Almquist, Heather R.. Upper Graven Lake | 10.21233/n3219d |
| Upper Mallot Lake | 2890 | 47.31 | -84.26 | 47.31 | 422 | McAndrews, John H.. Upper Mallot Lake | 10.21233/n3sj5k |
| Upper South Branch Pond | 2892 | 46.09 | -68.89 | 46.09 | 300 | Anderson, R. Scott. Upper South Branch Pond | 10.21233/n3nv29 |
| Utricularia Lake | 2897 | 35.97 | -108.81 | 35.97 | 2753 | Maher, Louis J., Jr.; Wright, Herbert E., Jr.. Utricularia Lake | 10.21233/n3148r |
| Lake Allie | 29 | 44.8 | -94.56 | 44.8 | 328 | McAndrews, John H.. Lake Allie | 10.21233/n32401 |
| Valhalla Hollow | 2902 | 44.31 | -74.37 | 44.31 | 480 | Kearsley, Jennifer B.. Valhalla Hollow | 10.21233/n3cb65 |
| Van Nostrand Lake | 2903 | 44 | -79.38 | 44 | 297 | McAndrews, John H.. Van Nostrand Lake | 10.21233/n37n48 |
| Baie du Diana | 2912 | 60.78 | -69.83 | 60.78 | 50 | Larouche, Alayn C.; Richard, Pierre J. H.. Baie du Diana | 10.21233/n36n3k |
| Volo Bog | 2919 | 42.35 | -88.18 | 42.35 | 229 | King, James E.. Volo Bog | 10.21233/n3f48g |
| Walker Lake | 2922 | 48.53 | -124 | 48.53 | 950 | Brown, Kendrick J.. Walker Lake | 10.21233/n35n38 |
| Watchtower Basin | 2925 | 52.78 | -117.08 | 52.78 | NA | Kearney, Michael S.. Watchtower Basin | 10.21233/n3sf5j |
| Waubashene Nippissing Transgression Site | 2926 | 44.78 | -79.68 | 44.78 | 190 | McAndrews, John H.. Waubashene Nippissing Transgression Site | 10.21233/n3nn3m |
| Water Conservation Area 2A, Site 2 (Site F1) | 2943 | 26.36 | -80.37 | 26.36 | 5 | Willard, Debra A.. Water Conservation Area 2A, Site 2 (Site F1) | 10.21233/n3kr31 |
| Water Conservation Area 2A, Site 3 (Site U3) | 2944 | 26.29 | -80.41 | 26.29 | 5 | Willard, Debra A.. Water Conservation Area 2A, Site 3 (Site U3) | 10.21233/n3g194 |
| Water Conservation Area 3A, Site 4 (CA315 (AAS)) | 2945 | 25.97 | -80.67 | 25.97 | 5 | Willard, Debra A.. Water Conservation Area 3A, Site 4 (CA315 (AAS)) | 10.21233/n3b78k |
| Wells Mastodon Site | 2947 | 41.08 | -86.43 | 41.08 | NA | Gooding, A. M.. Wells Mastodon Site | 10.21233/n32r3c |
| Wentzel's Pond | 2948 | 46.95 | -94.95 | 46.95 | 435 | Almendinger, John C.. Wentzel's Pond | 10.21233/n3z183 |
| Weslemkoon Lake | 2949 | 45.03 | -77.43 | 45.03 | 316 | McAndrews, John H.. Weslemkoon Lake | 10.21233/n3t77j |
| Whiskey Lake | 2950 | 35.98 | -108.81 | 35.98 | 2712 | Hansen, Barbara C. S.; Wright, Herbert E., Jr.. Whiskey Lake | 10.21233/n3pj5n |
| Whitney's Gulch | 2951 | 51.52 | -57.3 | 51.52 | 98 | Lamb, Henry F.. Whitney's Gulch | 10.21233/n3jr2b |
| Whyac Lake | 2953 | 48.67 | -124.84 | 48.67 | 15 | Brown, Kendrick J.. Whyac Lake | 10.21233/n3977w |
| Wien Lake | 2954 | 64.33 | -151.27 | 64.33 | 305 | Hu, Feng Sheng. Wien Lake | 10.21233/n35j50 |
| Wilcox Pass | 2955 | 52.24 | -117.22 | 52.24 | 2355 | Beaudoin, Alwynne B.. Wilcox Pass | 10.21233/n31r32 |
| Willow River Pond | 2956 | 46.32 | -92.78 | 46.32 | 314 | Jacobson, G.. Willow River Pond | 10.21233/n3x203 |
| Windsor Pond | 2957 | 42.54 | -72.98 | 42.54 | 496 | Patterson, William Albert, III. Windsor Pond | 10.21233/n3s78m |
| Winneconnet Pond | 2959 | 41.97 | -71.12 | 41.97 | 20 | Suter, Suzanne M.. Winneconnet Pond | 10.21233/n3nj5b |
| Bob Lake | 296 | 46.63 | -92.61 | 46.63 | 379 | McAndrews, John H.. Bob Lake | 10.21233/n3831x |
| Wintergreen Lake | 2961 | 42.4 | -85.38 | 42.4 | 271 | Bailey, Robert E.. Wintergreen Lake | 10.21233/n3d20f |
| Wild Spear Lake | 2962 | 59.25 | -114.15 | 59.25 | 880 | MacDonald, Glen. Wild Spear Lake | 10.21233/n38b67 |
| Bog D Pond | 298 | 47.18 | -95.16 | 47.18 | 460 | McAndrews, John H.. Bog D Pond | 10.21233/n30k65 |
| Almora Lake | 30 | 46.21 | -95.29 | 46.21 | 437 | Björck, Svante. Almora Lake | 10.21233/hc50-tz90 |
| Boone Lake | 302 | 55.58 | -119.43 | 55.58 | 872 | White, James M.. Boone Lake | 10.21233/n36d82 |
| Wolf Creek | 3029 | 46.12 | -94.12 | 46.12 | 375 | Birks, Harry John Betteley. Wolf Creek | 10.21233/n3r20j |
| Border Beacon | 303 | 55.33 | -63.2 | 55.33 | 470 | Lamb, Henry F.. Border Beacon | 10.21233/n32q4d |
| Wolsfeld Lake | 3031 | 45.01 | -93.57 | 45.01 | 292 | Grimm, Eric Christopher. Wolsfeld Lake | 10.21233/n3gj4d |
| Wolverine Lake | 3032 | 46.43 | -85.66 | 46.43 | 259 | Futyma, Richard. Wolverine Lake | 10.21233/n3br2g |
| Wonder Lake | 3033 | 63.48 | -151.08 | 63.48 | 610 | Anderson, Patricia M.. Wonder Lake | 10.21233/n3720w |
| Woodcliff Lake | 3034 | 41.02 | -74.03 | 41.02 | 29 | Solomon, A. M.. Woodcliff Lake | 10.21233/n3378d |
| Wood Lake | 3035 | 45.33 | -90.08 | 45.33 | 464 | Heide, Kathleen M.. Wood Lake | 10.21233/n3zj54 |
| Woodworth Pond | 3036 | 47.15 | -99.23 | 47.15 | 580 | McAndrews, John H.. Woodworth Pond | 10.21233/n3tr2t |
| Point Woronzof Peat Section | 3038 | 61.12 | -149.48 | 61.12 | NA | Ager, Thomas A.. Point Woronzof Peat Section | 10.21233/n3kb61 |
| Woski Pond | 3039 | 37.73 | -119.62 | 37.73 | 1212 | Anderson, R. Scott. Woski Pond | 10.21233/n3fj5g |
| Boriack Bog | 304 | 30.36 | -97.13 | 30.36 | 143 | Bryant, Vaughn M., Jr.. Boriack Bog | 10.21233/n3bw2v |
| Wylde Bog | 3041 | 43.9 | -80.4 | 43.9 | 484 | McAndrews, John H.. Wylde Bog | 10.21233/n3620k |
| Wylde Lake | 3042 | 43.91 | -80.4 | 43.91 | 484 | McAndrews, John H.. Wylde Lake | 10.21233/n32b50 |
| Lac Yelle | 3046 | 48.5 | -79.64 | 48.5 | 356 | Larouche, Alayn C.; Richard, Pierre J. H.. Lac Yelle | 10.21233/n3jb6q |
| Yellow Dog Pond | 3047 | 46.75 | -87.94 | 46.75 | 445 | Brubaker, Linda Beck. Yellow Dog Pond | 10.21233/n3dj3d |
| Yesterday Lake | 3048 | 56.77 | -119.48 | 56.77 | 1050 | MacDonald, Glen. Yesterday Lake | 10.21233/n38v2w |
| Bossuot Lake | 305 | 44.3 | -93.74 | 44.3 | 310 | McAndrews, John H.. Bossuot Lake | 10.21233/n37608 |
| Zuehl Farm Site | 3050 | 43.03 | -93.87 | 43.03 | 356 | Baker, Richard G.. Zuehl Farm Site | 10.21233/n31b7f |
| Found Lake | 3051 | 45.55 | -78.64 | 45.55 | 488 | McAndrews, John H.. Found Lake | 10.21233/n3wj5h |
| Head Lake | 3054 | 37.71 | -105.74 | 37.71 | 2300 | Davis, Owen K.; Shafer, David Scott. Head Lake | 10.21233/n3n48b |
| Como Lake | 3056 | 37.57 | -105.51 | 37.57 | 3523 | Davis, Owen K.; Shafer, David Scott. Como Lake | 10.21233/n3hb7s |
| Basswood Road Lake/Splan Pond | 3058 | 45.25 | -67.33 | 45.25 | 106 | Mott, Robert J.. Basswood Road Lake/Splan Pond | 10.21233/n3cn34 |
| Lac Boucané | 306 | 47.46 | -69.45 | 47.46 | 500 | Larouche, Alayn C.; Lortie, G.; Richard, Pierre J. H.. Lac Boucané | 10.21233/n33c7d |
| Bechan Cave | 3060 | 37.37 | -110.87 | 37.37 | 1280 | Davis, Owen K.. Bechan Cave | 10.21233/n34479 |
| Boundary Lake | 307 | 55.25 | -67.4 | 55.25 | 525 | Stravers, Loreen K. Stegeman. Boundary Lake | 10.21233/n3jq3c |
| Boundary Pond | 308 | 45.57 | -70.67 | 45.57 | 603 | Mott, Robert J.. Boundary Pond | 10.21233/n3f11s |
| Disterhaft Farm Bog | 3081 | 43.92 | -89.17 | 43.92 | 244 | Baker, Richard G.. Disterhaft Farm Bog | 10.21233/n39n4w |
| Brandreth Bog | 309 | 43.92 | -74.68 | 43.92 | 600 | Overpeck, Jonathan T.. Brandreth Bog | 10.21233/n39699 |
| Brisay 2 | 311 | 54.36 | -70.36 | 54.36 | 595 | Bouchard, Michel A.; Larouche, Alayn C.; Richard, Pierre J. H.. Brisay 2 | 10.21233/n31q3q |
| Brophy Ditch | 312 | 43.22 | -81.73 | 43.22 | 184 | McAndrews, John H.. Brophy Ditch | 10.21233/n39w3x |
| E Lake | 3125 | 50.69 | -99.66 | 50.69 | 735 | Ritchie, James C.. E Lake | 10.21233/n3mv20 |
| Ferndale Bog | 3126 | 34.41 | -95.81 | 34.41 | 263 | Albert, Lois E.. Ferndale Bog | 10.21233/n3h20c |
| Floating Island Lake | 3127 | 44.55 | -107.47 | 44.55 | 2609 | Baker, Richard G.. Floating Island Lake | 10.21233/n3cb7j |
| Brown Lake | 313 | 45.78 | -89.49 | 45.78 | 448 | Shane, Linda C. K.. Brown Lake | 10.21233/n36591 |
| Heart Lake | 3130 | 44.18 | -73.97 | 44.18 | 661 | Whitehead, Donald R.. Heart Lake | 10.21233/n37j60 |
| Hells Kitchen Lake | 3131 | 46.19 | -89.7 | 46.19 | 488 | Swain, Albert M.. Hells Kitchen Lake | 10.21233/n33v2b |
| Hershop Bog | 3132 | 29.58 | -97.61 | 29.58 | 124 | Larson, Donald A.. Hershop Bog | 10.21233/n3020q |
| Jacobson Lake | 3138 | 46.42 | -92.72 | 46.42 | 324 | Watts, William A.. Jacobson Lake | 10.21233/n3g202 |
| Brown's Bay, Lake Minnetonka | 314 | 44.96 | -93.55 | 44.96 | 300 | Shane, Linda C. K.. Brown's Bay, Lake Minnetonka | 10.21233/n32c8g |
| John Klondike Bog | 3149 | 60.36 | -123.65 | 60.36 | 460 | Matthews, John V., Jr.. John Klondike Bog | 10.21233/n35n4n |
| Brown Lake | 315 | 40.68 | -82.06 | 40.68 | 295 | Shane, Linda C. K.. Brown Lake | 10.21233/n3hq32 |
| Browns Pond | 316 | 38.15 | -79.62 | 38.15 | 620 | Kneller, Margaret. Browns Pond | 10.21233/n3d12v |
| Buckbean Fen | 318 | 44.3 | -110.26 | 44.3 | 2362 | Baker, Richard G.. Buckbean Fen | 10.21233/n34h6q |
| Buck Lake | 319 | 27.23 | -81.33 | 27.23 | 45 | Watts, William A.. Buck Lake | 10.21233/n30q4s |
| Bucyrus Bog | 321 | 40.8 | -82.93 | 40.8 | 318 | Shane, Linda C. K.. Bucyrus Bog | 10.21233/n3902k |
| Burden Lake | 324 | 42.6 | -73.56 | 42.6 | 192 | Gaudreau, Denise C.. Burden Lake | 10.21233/n31g7t |
| Burntside Lake | 325 | 47.92 | -91.99 | 47.92 | NA | Wright, Herbert E., Jr.. Burntside Lake | 10.21233/n3gt3s |
| Lac à la Busque | 326 | 46.28 | -70.6 | 46.28 | 330 | Larouche, Alayn C.; Richard, Pierre J. H.. Lac à la Busque | 10.21233/n3c115 |
| Cahaba Pond | 328 | 33.5 | -86.53 | 33.5 | 204 | Delcourt, Hazel R.. Cahaba Pond | 10.21233/n33h51 |
| Saint-Calixte | 329 | 45.96 | -73.87 | 45.96 | 261 | Larouche, Alayn C.; Richard, Pierre J. H.. Saint-Calixte | 10.21233/n3cp57 |
| Camel Lake | 331 | 30.27 | -85.02 | 30.27 | 20 | Grimm, Eric Christopher; Hansen, Barbara C. S.; Watts, William A.. Camel Lake | 10.21233/n3460b |
| Camp 11 Lake | 332 | 46.67 | -88.02 | 46.67 | 549 | Brubaker, Linda Beck. Camp 11 Lake | 10.21233/n30g64 |
| Camp 12 Lake | 333 | 45.99 | -89.38 | 45.99 | 505 | Shane, Linda C. K.. Camp 12 Lake | 10.21233/n3ft4v |
| Campbell Lake | 334 | 44.71 | -93.5 | 44.71 | 281 | McAndrews, John H.. Campbell Lake | 10.21233/n3b127 |
| Candelabra Lake | 336 | 61.68 | -130.65 | 61.68 | 1040 | Cwynar, Les C.. Candelabra Lake | 10.21233/n32h63 |
| Tourbière Caribou | 337 | 47.64 | -71.24 | 47.64 | 790 | Larouche, Alayn C.; Richard, Pierre J. H.. Tourbière Caribou | 10.21233/n3bs4k |
| Carbuncle Pond | 338 | 41.7 | -71.78 | 41.7 | 342 | Bernabo, J. Christopher. Carbuncle Pond | 10.21233/n3701k |
| Lac Caribou | 339 | 48.2 | -64.94 | 48.2 | 116 | Bail, P.; Jetté, Hélène; Labelle, Claude; Larouche, Alayn C.; Richard, Pierre J. H.. Lac Caribou | 10.21233/n33894 |
| Caribou Bog | 340 | 44.94 | -68.77 | 44.94 | 37 | Gajewski, Konrad J.. Caribou Bog | 10.21233/n3jm53 |
| Caribou Hill | 341 | 55.67 | -63.25 | 55.67 | 475 | Lamb, Henry F.. Caribou Hill | 10.21233/n3dt35 |
| Carp Lake | 343 | 45.92 | -120.88 | 45.92 | 714 | Whitlock, Cathy. Carp Lake | 10.21233/n3597b |
| Carter Site | 345 | 40.22 | -84.68 | 40.22 | 305 | Shane, Linda C. K.. Carter Site | 10.21233/n39s3w |
| Kellys Hollow | 3452 | 45.3 | -90.35 | 45.3 | 470 | Heide, Kathleen M.. Kellys Hollow | 10.21233/n31b8t |
| Marais de Keswick | 3454 | 44.2 | -79.51 | 44.2 | 221 | Dinel, Henri; Larouche, Alayn C.; Levésque, P. E. M.; Richard, Pierre J. H.. Marais de Keswick | 10.21233/n3rv3m |
| Kirchner Marsh | 3455 | 44.77 | -93.12 | 44.77 | 286 | Wright, Herbert E., Jr.. Kirchner Marsh | 10.21233/n3n50n |
| Lac Castor | 346 | 46.61 | -73 | 46.61 | 220 | Larouche, Alayn C.; Occhietti, S.; Richard, Pierre J. H.. Lac Castor | 10.21233/n3602n |
| Lake Ann | 3468 | 45.42 | -93.69 | 45.42 | 291 | Shane, Linda C. K.. Lake Ann | 10.21233/n3350p |
| Cascade Fen [Engineer Mountain Bog] | 347 | 37.65 | -107.81 | 37.65 | 2690 | Maher, Louis J., Jr.. Cascade Fen [Engineer Mountain Bog] | 10.21233/n3288f |
| Lake BI2 | 3471 | 57.12 | -76.38 | 57.12 | 210 | Gajewski, Konrad J.. Lake BI2 | 10.21233/n3pz18 |
| Lake Mary | 3473 | 46.25 | -89.9 | 46.25 | 488 | Webb, Thompson III. Lake Mary | 10.21233/n3k501 |
| Lake of the Clouds | 3482 | 48.14 | -91.11 | 48.14 | 462 | Craig, Alan J.. Lake of the Clouds | 10.21233/n35z20 |
| Lake of the Clouds | 3483 | 48.14 | -91.11 | 48.14 | 462 | Swain, Albert M.. Lake of the Clouds | 10.21233/n3250c |
| Lake Louise | 3484 | 30.73 | -83.26 | 30.73 | 49 | Watts, William A.. Lake Louise | 10.21233/n3xf7j |
| McNearney Lake | 3485 | 46.43 | -84.95 | 46.43 | 264 | Shane, Linda C. K.. McNearney Lake | 10.21233/n3sn5m |
| McNearney Lake | 3486 | 46.43 | -84.95 | 46.43 | 264 | Shane, Linda C. K.. McNearney Lake | 10.21233/n3nz2b |
| Medicine Lake | 3487 | 44.98 | -97.35 | 44.98 | 519 | Radle, Nancy Jean. Medicine Lake | 10.21233/n3j50q |
| Lake Mendota | 3488 | 43.1 | -89.42 | 43.1 | 257 | Winkler, Marjorie Green. Lake Mendota | 10.21233/n3df7w |
| Lake Minnie | 3492 | 47.24 | -95.01 | 47.24 | 430 | McAndrews, John H.. Lake Minnie | 10.21233/n3wf8m |
| Mohawk Pond | 3493 | 41.81 | -73.29 | 41.81 | 360 | Webb, Thompson III. Mohawk Pond | 10.21233/n3rr5b |
| Muscotah Marsh | 3495 | 39.53 | -95.51 | 39.53 | 280 | Grüger, Johanna. Muscotah Marsh | 10.21233/qemt-3250 |
| Nichols Brook Site | 3497 | 42.54 | -78.48 | 42.54 | 438 | McAndrews, John H.. Nichols Brook Site | 10.21233/n3cf8z |
| Patschke Bog | 3500 | 30.37 | -97.12 | 30.37 | 142 | Bryant, Vaughn M., Jr.. Patschke Bog | 10.21233/n33z3r |
| Cedar Bog | 352 | 45.41 | -93.2 | 45.41 | NA | Cushing, Edward J., Jr.. Cedar Bog | 10.21233/n3498d |
| Pickerel Lake | 3542 | 45.5 | -97.28 | 45.5 | 395 | Watts, William A.. Pickerel Lake | 10.21233/n32v3d |
| Pogonia Bog Pond | 3558 | 45.04 | -93.63 | 45.04 | 292 | Cushing, Edward J., Jr.. Pogonia Bog Pond | 10.21233/n30z2f |
| Portage Marsh | 3559 | 41.58 | -87.22 | 41.58 | 189 | Jackson, Stephen T.. Portage Marsh | 10.21233/n3w516 |
| Potato Lake | 3561 | 34.46 | -111.35 | 34.46 | 2205 | Anderson, R. Scott. Potato Lake | 10.21233/n3mn6f |
| Pretty Lake | 3563 | 41.58 | -85.25 | 41.58 | 294 | Jones, Alice Simms. Pretty Lake | 10.21233/n3gz35 |
| Saint-Raymond | 3565 | 46.89 | -71.81 | 46.89 | 160 | Larouche, Alayn C.; Richard, Pierre J. H.. Saint-Raymond | 10.21233/n37f7b |
| Rockyhock Bay | 3582 | 36.17 | -76.68 | 36.17 | 6 | Whitehead, Donald R.. Rockyhock Bay | 10.21233/n31r5t |
| Sagehen Marsh | 3608 | 37.47 | -108.5 | 37.47 | 2085 | Petersen, Kenneth L.. Sagehen Marsh | 10.21233/n3pb8q |
| Chase Pond | 361 | 45.65 | -60.67 | 45.65 | 15 | Mayle, Frank. Chase Pond | 10.21233/n33d7r |
| San Agustin Plains | 3611 | 33.87 | -108.25 | 33.87 | 2069 | Markgraf, Vera. San Agustin Plains | 10.21233/n39228 |
| San Agustin Plains | 3612 | 33.87 | -108.25 | 33.87 | 2069 | Markgraf, Vera. San Agustin Plains | 10.21233/n35b9f |
| Sierra Bacha 1 | 3615 | 29.77 | -112.58 | 29.77 | 220 | Anderson, R. Scott. Sierra Bacha 1 | 10.21233/n3s22m |
| Sierra Bacha 1 | 3616 | 29.77 | -112.58 | 29.77 | 220 | Anderson, R. Scott. Sierra Bacha 1 | 10.21233/n3nb9s |
| Seidel | 3620 | 44.45 | -87.52 | 44.45 | 211 | Maher, Louis J., Jr.. Seidel | 10.21233/n34b94 |
| Cheyenne Bottoms | 367 | 38.47 | -98.67 | 38.47 | 547 | Fredlund, Glen G.. Cheyenne Bottoms | 10.21233/n39x2w |
| Chippewa Bog | 369 | 43.12 | -83.24 | 43.12 | 270 | Bailey, Robert E.. Chippewa Bog | 10.21233/n32d8t |
| Chism 1 | 371 | 54.8 | -76.15 | 54.8 | 340 | Larouche, Alayn C.; Richard, Pierre J. H.. Chism 1 | 10.21233/n36w30 |
| Chism 2 | 373 | 53.09 | -76.34 | 53.09 | 273 | Larouche, Alayn C.; Richard, Pierre J. H.. Chism 2 | 10.21233/n3jd7s |
| Chatsworth Bog | 375 | 40.68 | -88.32 | 40.68 | 219 | King, James E.. Chatsworth Bog | 10.21233/n38x16 |
| Snow Lake | 3771 | 56.63 | -63.88 | 56.63 | 522 | Lamb, Henry F.. Snow Lake | 10.21233/n3mn7t |
| Spiritwood Lake | 3774 | 47.07 | -98.59 | 47.07 | 437 | McAndrews, John H.. Spiritwood Lake | 10.21233/n37b92 |
| Basswood Road Lake/Splan Pond | 3775 | 45.25 | -67.33 | 45.25 | 106 | Mayle, Frank. Basswood Road Lake/Splan Pond | 10.21233/n33n6s |
| Stone Lake Tamarack Swamp | 3780 | 44.89 | -93.69 | 44.89 | 288 | Swain, Patricia C.. Stone Lake Tamarack Swamp | 10.21233/n3fv46 |
| Stewart's Dark Lake | 3781 | 45.3 | -91.45 | 45.3 | 335 | Peters, M. A.. Stewart's Dark Lake | 10.21233/n3b517 |
| Taylor Creek Site 2 | 3782 | 25.21 | -80.64 | 25.21 | 5 | Willard, Debra A.. Taylor Creek Site 2 | 10.21233/n36c0p |
| Third Lake | 3784 | 48.1 | -92.01 | 48.1 | 446 | Swain, Patricia C.. Third Lake | 10.21233/n3xv5x |
| Third Lake | 3788 | 48.1 | -92.01 | 48.1 | 446 | Swain, Patricia C.. Third Lake | 10.21233/n3dz4x |
| Tom Swamp | 3789 | 42.52 | -72.21 | 42.52 | 231 | Davis, Margaret B.. Tom Swamp | 10.21233/n3951x |
| Tom Swamp | 3790 | 42.52 | -72.21 | 42.52 | 231 | Webb, Thompson III. Tom Swamp | 10.21233/n35f83 |
| Lac Ciel Blanc | 381 | 59.52 | -122.17 | 59.52 | 651 | MacDonald, Glen. Lac Ciel Blanc | 10.21233/n39k6z |
| Cindy Pond | 382 | 47.17 | -94.94 | 47.17 | 478 | McAndrews, John H.. Cindy Pond | 10.21233/n35w29 |
| Upper Wallface Pond | 3830 | 44.15 | -74.06 | 44.15 | 948 | Whitehead, Donald R.. Upper Wallface Pond | 10.21233/n3923n |
| Vestaburg Bog | 3831 | 43.42 | -84.88 | 43.42 | 255 | Gilliam, Jeanne A.. Vestaburg Bog | 10.21233/n3580b |
| Weber Lake | 3837 | 47.47 | -91.66 | 47.47 | 559 | Fries, Magnus. Weber Lake | 10.21233/n3n80p |
| Weslemkoon Lake | 3839 | 45.03 | -77.43 | 45.03 | 316 | McAndrews, John H.. Weslemkoon Lake | 10.21233/n3cr69 |
| White Pond | 3840 | 34.17 | -80.78 | 34.17 | 90 | Watts, William A.. White Pond | 10.21233/n3822z |
| White Lily Lake | 3841 | 46.09 | -93.1 | 46.09 | 344 | Cushing, Edward J., Jr.. White Lily Lake | 10.21233/n3481d |
| West Sand Lake Peat Bog | 3858 | 42.63 | -73.6 | 42.63 | 170 | Webb, Thompson III. West Sand Lake Peat Bog | 10.21233/n3xj8z |
| Black Point Pond | 39181 | 41.35 | -70.67 | 41.35 | 1 | Stevens, Andrea. Black Point Pond | 10.21233/c4da-ww94 |
| Deep Bottom Cove | 39190 | 41.37 | -70.64 | 41.37 | 1 | Stevens, Andrea. Deep Bottom Cove | 10.21233/aqgv-2q47 |
| Muddy Cove Pond | 39192 | 41.38 | -70.67 | 41.38 | 2 | Stevens, Andrea. Muddy Cove Pond | 10.21233/m1nn-j666 |
| Long Cove Pond | 39221 | 41.36 | -70.63 | 41.36 | 1 | Stevens, Andrea. Long Cove Pond | 10.21233/3qkj-8536 |
| Watcha Pond | 39348 | 41.36 | -70.61 | 41.36 | 1 | Stevens, Andrea. Watcha Pond | 10.21233/pebe-4054 |
| Jobs Neck Pond | 39355 | 41.36 | -70.58 | 41.36 | 2 | Stevens, Andrea. Jobs Neck Pond | 10.21233/kweg-6012 |
| Mathews Pond | 39474 | 46.32 | -69.06 | 46.32 | 340 | Nurse, Andrea Masterman. Mathews Pond | 10.21233/5qpr-qt63 |
| Big Moose Lake | 39749 | 43.83 | -74.85 | 43.83 | 556 | Whitehead, Donald R.. Big Moose Lake | 10.21233/hr41-mn70 |
| White Pond | 40111 | 34.17 | -80.78 | 34.17 | 90 | Krause, Teresa. White Pond | 10.21233/k2nt-2b74 |
| Stotzel-Leis Site | 40168 | 40.22 | -84.69 | 40.22 | 309 | Lowell, Thomas V.; Williams, John W.. Stotzel-Leis Site | 10.21233/zq7z-7471 |
| Jane's Cove | 40519 | 41.38 | -70.57 | 41.38 | 7 | Stevens, Andrea. Jane's Cove | 10.21233/g5jk-1e91 |
| Mashacket Cove | 40591 | 41.37 | -70.55 | 41.37 | 0 | Stevens, Andrea. Mashacket Cove | 10.21233/zwy9-1y47 |
| Slough Cove | 40600 | 41.36 | -70.54 | 41.36 | 0 | Stevens, Andrea. Slough Cove | 10.21233/4e54-t197 |
| Lagoon Pond | 40620 | 41.43 | -70.6 | 41.43 | 1 | Stevens, Andrea. Lagoon Pond | 10.21233/vxbn-ga20 |
| Lake Tashmoo | 40625 | 41.46 | -70.63 | 41.46 | 0 | Stevens, Andrea. Lake Tashmoo | 10.21233/69jx-br65 |
| Cedar Tree Neck Bog | 40666 | 41.43 | -70.7 | 41.43 | 15 | Stevens, Andrea. Cedar Tree Neck Bog | 10.21233/g9hf-1t92 |
| Benson Pond | 40791 | 42.38 | -73.09 | 42.38 | 499 | Oswald, W. Wyatt. Benson Pond | 10.21233/zkeb-rj50 |
| Berry Pond | 40793 | 42.62 | -71.09 | 42.62 | 39 | Oswald, W. Wyatt. Berry Pond | 10.21233/9na2-9193 |
| Black Pond | 40795 | 41.33 | -70.79 | 41.33 | 11 | Oswald, W. Wyatt. Black Pond | 10.21233/5jx5-2077 |
| Blaney's Pond | 40797 | 41.47 | -70.77 | 41.47 | 5 | Foster, David R.; Hansen, Barbara C. S.; Oswald, W. Wyatt; Shuman, Bryan N.. Blaney's Pond | 10.21233/eqhn-8105 |
| Blood Pond | 40799 | 42.08 | -71.96 | 42.08 | 212 | Oswald, W. Wyatt. Blood Pond | 10.21233/djae-0e22 |
| Deep-Falmouth Pond | 40803 | 41.56 | -70.64 | 41.56 | 18 | Oswald, W. Wyatt. Deep-Falmouth Pond | 10.21233/ca85-bh57 |
| Deep-Taunton Pond | 40844 | 41.88 | -71.01 | 41.88 | 4 | Oswald, W. Wyatt. Deep-Taunton Pond | 10.21233/xpy2-m222 |
| Doe Pond | 40854 | 42.18 | -72.7 | 42.18 | 77 | Oswald, W. Wyatt. Doe Pond | 10.21233/yqqw-9459 |
| Green Pond | 40861 | 42.57 | -72.51 | 42.57 | 80 | Oswald, W. Wyatt. Green Pond | 10.21233/ja1n-6b46 |
| Guilder Pond | 40875 | 42.11 | -73.44 | 42.11 | 624 | Oswald, W. Wyatt. Guilder Pond | 10.21233/n4bq-p922 |
| Knob Hill Pond | 40914 | 44.36 | -72.37 | 44.36 | 378 | Oswald, W. Wyatt. Knob Hill Pond | 10.21233/xa6z-jh17 |
| Grant's Bog | 40976 | 49.79 | -125.13 | 49.79 | 80 | Lacourse, Terri. Grant's Bog | 10.21233/jvxc-rw58 |
| Little Royalston Pond | 40988 | 42.68 | -72.19 | 42.68 | 301 | Oswald, W. Wyatt. Little Royalston Pond | 10.21233/qwc5-y182 |
| Little Willey Pond | 40992 | 43.29 | -71.18 | 43.29 | 253 | Oswald, W. Wyatt. Little Willey Pond | 10.21233/h3x5-xz62 |
| Sears Pond | 41001 | 40.89 | -72.58 | 40.89 | 2 | Oswald, W. Wyatt. Sears Pond | 10.21233/66j3-t441 |
| Umpawaug Pond | 41016 | 41.31 | -73.45 | 41.31 | 140 | Oswald, W. Wyatt. Umpawaug Pond | 10.21233/d1x1-y622 |
| Uncle Seth's Pond | 41018 | 41.43 | -70.66 | 41.43 | 15 | Oswald, W. Wyatt. Uncle Seth's Pond | 10.21233/43vz-0d54 |
| Ware Pond | 41025 | 42.48 | -70.88 | 42.48 | 3 | Oswald, W. Wyatt. Ware Pond | 10.21233/98b3-ep64 |
| West Side Pond | 41027 | 41.85 | -73.26 | 41.85 | 392 | Oswald, W. Wyatt. West Side Pond | 10.21233/16gz-mt48 |
| Henrys Fork (lower exposure) | 41032 | 40.82 | -110.38 | 40.82 | 3100 | Munroe, Jeffrey S.. Henrys Fork (lower exposure) | 10.21233/vbng-ww03 |
| Henrys Fork (upper exposure) | 41034 | 40.8 | -110.36 | 40.8 | 3550 | Munroe, Jeffrey S.. Henrys Fork (upper exposure) | 10.21233/fjnd-v956 |
| Mission Cross Bog | 41036 | 41.78 | -115.48 | 41.78 | 2424 | Norman, Kelly Burkle. Mission Cross Bog | 10.21233/4wy5-fr80 |
| Lake Billyakh | 41098 | 65.29 | 126.77 | 65.29 | 340 | Müller, Stefanie. Lake Billyakh | 10.21233/5h6b-ds48 |
| Lake Billyakh | 41138 | 65.29 | 126.77 | 65.29 | 340 | Müller, Stefanie. Lake Billyakh | 10.21233/8d9a-qw75 |
| Gem Lake | 41140 | 40.88 | -106.73 | 40.88 | 3101 | Calder, William J.. Gem Lake | 10.21233/ma1q-f261 |
| Summit Lake | 41146 | 40.55 | -106.68 | 40.55 | 3149 | Calder, William J.; Shuman, Bryan N.. Summit Lake | 10.21233/ngxf-6p79 |
| Seven Lakes | 41159 | 40.9 | -106.68 | 40.9 | 3276 | Calder, William J.. Seven Lakes | 10.21233/z7gy-mw75 |
| Gold Creek Lake | 41161 | 40.78 | -106.68 | 40.78 | 2917 | Calder, William J.. Gold Creek Lake | 10.21233/m3wr-jd95 |
| Hidden Lake | 41163 | 40.5 | -106.61 | 40.5 | 2704 | Calder, William J.. Hidden Lake | 10.21233/jky8-1c56 |
| Hinman Lake | 41171 | 40.77 | -106.83 | 40.77 | 2501 | Calder, William J.. Hinman Lake | 10.21233/x91r-1a30 |
| Goat Lake | 41183 | 60.26 | -149.91 | 60.26 | 550 | Anderson, R. Scott; Berg, Edward E.; Daigle, Thomas A.; Kaufman, Darrell S.; Schiff, Caleb J.. Goat Lake | 10.21233/qjda-f561 |
| Old Crow Flats (Core XVI) | 41370 | 67.89 | -139.18 | 67.89 | 303 | Ovenden, Lynn E.. Old Crow Flats (Core XVI) | 10.21233/pwv6-9p58 |
| Old Crow Flats (Core XV) | 41372 | 68.1 | -140.4 | 68.1 | 297 | Ovenden, Lynn E.. Old Crow Flats (Core XV) | 10.21233/r3s5-jj13 |
| Old Crow Flats (Core VB) | 41374 | 67.99 | -139.25 | 67.99 | 299 | Ovenden, Lynn E.. Old Crow Flats (Core VB) | 10.21233/h1em-w539 |
| Old Crow Flats (Core VI) | 41405 | 67.99 | -139.12 | 67.99 | 303 | Ovenden, Lynn E.. Old Crow Flats (Core VI) | 10.21233/m27n-t385 |
| Old Crow Flats (Core VI) | 41407 | 67.99 | -139.12 | 67.99 | 303 | Ovenden, Lynn E.. Old Crow Flats (Core VI) | 10.21233/w1xv-0x69 |
| Old Crow Flats (Core IX) | 41443 | 67.48 | -139.52 | 67.48 | 300 | Ovenden, Lynn E.. Old Crow Flats (Core IX) | 10.21233/m8tb-sn46 |
| Old Crow Flats (Core IX) | 41463 | 67.48 | -139.52 | 67.48 | 300 | Ovenden, Lynn E.. Old Crow Flats (Core IX) | 10.21233/af33-n167 |
| Old Crow Flats (Core BB) | 41495 | 67.45 | -139.64 | 67.45 | 305 | Ovenden, Lynn E.. Old Crow Flats (Core BB) | 10.21233/2zcy-7m40 |
| Old Crow Flats (Core CB) | 41497 | 68.11 | -140.86 | 68.11 | 292 | Ovenden, Lynn E.. Old Crow Flats (Core CB) | 10.21233/fw3s-ft98 |
| Old Crow Flats (Core KE) | 41499 | 67.93 | -140.83 | 67.93 | 335 | Ovenden, Lynn E.. Old Crow Flats (Core KE) | 10.21233/j6p7-zb53 |
| Lake Elsinore | 41537 | 33.66 | -117.35 | 33.66 | 376 | Heusser, Linda E.; Kirby, Matthew E.. Lake Elsinore | 10.21233/c46j-ka17 |
| Hermit Lake | 41580 | 38.09 | -105.63 | 38.09 | 3450 | Anderson, R. Scott; Jiménez-Moreno, Gonzalo; Soltow, Hanna R.. Hermit Lake | 10.21233/ywn4-f081 |
| BC2 | 41585 | 58.46 | -124.47 | 58.46 | 1625 | Pisaric, Michael F. J.. BC2 | 10.21233/0kpq-2t52 |
| Sunset Lake | 41606 | 58.5 | -124.65 | 58.5 | 1530 | Pisaric, Michael F. J.. Sunset Lake | 10.21233/11ph-mc56 |
| Dead Spruce Lake | 41612 | 58.58 | -124.55 | 58.58 | 1378 | Pisaric, Michael F. J.. Dead Spruce Lake | 10.21233/mgtf-q479 |
| Emerald Lake | 41614 | 39.15 | -106.41 | 39.15 | 3051 | Anderson, R. Scott; Jiménez-Moreno, Gonzalo; Shuman, Bryan N.; Yackulic, Ethan. Emerald Lake | 10.21233/ch26-4s93 |
| Foy Lake | 41762 | 48.16 | -114.36 | 48.16 | 1006 | Power, Mitchell J.. Foy Lake | 10.21233/bdex-mm22 |
| Lake WA01 | 41864 | 61.24 | -136.93 | 61.24 | 1000 | Ravindra, Rebecca. Lake WA01 | 10.21233/ek47-9m35 |
| Beaverhouse Lake | 42001 | 46.15 | -85.49 | 46.15 | 193 | Rivers, William Petty. Beaverhouse Lake | 10.21233/dge8-0c88 |
| Unit Lake | 42161 | 59.41 | -97.49 | 59.41 | 294 | Camill, Philip; Umbanhowar, Charles E., Jr.. Unit Lake | 10.21233/9de9-am39 |
| Greylock Bog | 42197 | 46.12 | -85.52 | 46.12 | 195 | Rivers, William Petty. Greylock Bog | 10.21233/4ewm-9y98 |
| US 2 Bog | 42379 | 46.1 | -85.52 | 46.1 | 182 | Rivers, William Petty. US 2 Bog | 10.21233/jatv-m956 |
| Carnegie Trail Pond | 42537 | 46.09 | -85.52 | 46.09 | 182 | Rivers, William Petty. Carnegie Trail Pond | 10.21233/jt80-m966 |
| Antler Pond | 42547 | 40.02 | -107.12 | 40.02 | 3128 | Anderson, R. Scott. Antler Pond | 10.21233/qg8e-np07 |
| Whitebark Moraine Pond | 42559 | 43.79 | -110.79 | 43.79 | 2801 | Kelly, Kyleen E.. Whitebark Moraine Pond | 10.21233/asm4-3r71 |
| Soldier Creek Meadow | 42645 | 32.7 | -109.92 | 32.7 | 2860 | Anderson, R. Scott; Smith, Susan J.. Soldier Creek Meadow | 10.21233/2wvj-4383 |
| Northwest Gander River | 42663 | 48.58 | -55.42 | 48.58 | 164 | Vardy, Sheila R.. Northwest Gander River | 10.21233/rgr7-f616 |
| West Side Pond | 42675 | 52.54 | -131.79 | 52.54 | 16 | Lacourse, Terri. West Side Pond | 10.21233/4t3y-1v17 |
| Pool's Cove Pond | 42679 | 47.63 | -55.51 | 47.63 | 150 | Vardy, Sheila R.. Pool's Cove Pond | 10.21233/fy68-3t56 |
| Moose Pond | 42712 | 47.92 | -55.57 | 47.92 | 130 | Vardy, Sheila R.. Moose Pond | 10.21233/t318-n046 |
| Conne River | 42722 | 48.25 | -55.49 | 48.25 | 199 | Vardy, Sheila R.. Conne River | 10.21233/4n0x-dj49 |
| Keyhold Pond | 42745 | 61.08 | -138.37 | 61.08 | 826 | Whittmire, Christina Mabel. Keyhold Pond | 10.21233/tekc-rz82 |
| Twin Lakes | 42879 | 41.32 | -123.67 | 41.32 | 1150 | Wanket, James Achiel. Twin Lakes | 10.21233/vxd9-w853 |
| Aino Pond | 4557 | 42.68 | -71.93 | 42.68 | 354 | Boose, Emery R.; Foster, David R.; Fuller, Janice L.. Aino Pond | 10.21233/baym-xw55 |
| Dead Frog Pond | 4558 | 42.57 | -72.51 | 42.57 | 80 | Foster, David R.; Fuller, Janice L.. Dead Frog Pond | 10.21233/dqcs-v558 |
| Kilgii Pond | 45652 | 52.16 | -131.1 | 52.16 | NA | Helmer, Emily; Lacourse, Terri; Mathewes, Rolf W.. Kilgii Pond | 10.21233/cetd-vt38 |
| Mirror Lake | 45655 | 38.74 | -106.43 | 38.74 | 3347 | Del Priore, Tera Marie. Mirror Lake | 10.21233/cvyt-k021 |
| Triangle Lake Bog | 45695 | 41.12 | -81.26 | 41.12 | 330 | Jensen, Allison M.; Williams, John W.. Triangle Lake Bog | 10.21233/gmdn-sh18 |
| Bonnett Lake | 45816 | 40.67 | -82.14 | 40.67 | 285 | Fastovich, David; Williams, John W.. Bonnett Lake | 10.21233/x7et-qe66 |
| Sweeton Pond | 46131 | 36.79 | -92.22 | 36.79 | 304 | Grimm, Eric Christopher; Nanavati, William, P.. Sweeton Pond | 10.21233/h94p-kc68 |
| Anthony Lake | 46290 | 44.96 | -118.23 | 44.96 | 2174 | Long, Colin James. Anthony Lake | 10.21233/26yg-qw36 |
| Twin Lakes | 46292 | 47.24 | -113.91 | 47.24 | 1263 | Alt, Mio. Twin Lakes | 10.21233/9pc1-0436 |
| Little Windy Hill Pond | 46611 | 41.43 | -106.34 | 41.43 | 2980 | Minckley, Thomas A.. Little Windy Hill Pond | 10.21233/BHM0-3F23 |
| Begbie Lake | 46630 | 48.59 | -123.68 | 48.59 | 188 | Hebda, Nicholas J. R.. Begbie Lake | 10.21233/MYT8-WA75 |
| Lower Paintrock Lake | 46645 | 44.39 | -107.38 | 44.39 | 2798 | Minckley, Thomas A.; Rust, Robert A.. Lower Paintrock Lake | 10.21233/GZGE-Q874 |
| Rainbow Lake | 46659 | 44.94 | -109.5 | 44.94 | 2963 | Minckley, Thomas A.; Rust, Robert A.. Rainbow Lake | 10.21233/YE3D-FJ80 |
| Hummingbird Lake | 46672 | 56.55 | -135.01 | 56.55 | 46 | Ager, Thomas A.. Hummingbird Lake | 10.21233/X9TF-0J97 |
| West LaSalle | 46680 | 53.52 | -120.68 | 53.52 | 878 | White, Ariana. West LaSalle | 10.21233/9FDV-XK62 |
| Paisley Cave 2 | 46682 | 42.76 | -120.57 | 42.76 | 1378 | Beck, Chase W.; Bryant, Vaughn M., Jr.. Paisley Cave 2 | 10.21233/4QB2-3C42 |
| Paisley Cave 2 | 46684 | 42.76 | -120.57 | 42.76 | 1378 | Beck, Chase W.; Bryant, Vaughn M., Jr.. Paisley Cave 2 | 10.21233/KSFK-9704 |
| Billings Park | 46716 | 46.71 | -92.14 | 46.71 | 188 | Nurse, Andrea Masterman. Billings Park | 10.21233/BTKV-JS74 |
| North Bay | 46718 | 46.65 | -92.24 | 46.65 | 183 | Nurse, Andrea Masterman. North Bay | 10.21233/JFQ2-0A48 |
| Minnesota Point | 46720 | 46.73 | -92.07 | 46.73 | 184 | Nurse, Andrea Masterman. Minnesota Point | 10.21233/9Q9F-B230 |
| Pokegama Bay | 46722 | 46.7 | -92.17 | 46.7 | 186 | Nurse, Andrea Masterman. Pokegama Bay | 10.21233/ME1H-RK46 |
| North of Clough Island | 46726 | 46.71 | -92.19 | 46.71 | 193 | Nurse, Andrea Masterman. North of Clough Island | 10.21233/3M1B-H276 |
| Beauty Lake | 46730 | 44.97 | -109.57 | 44.97 | 2878 | Nurse, Andrea Masterman; Spaulding, Sarah A.. Beauty Lake | 10.21233/CBMY-KS16 |
| Hospital Flat Meadow | 46801 | 32.67 | -109.88 | 32.67 | 2747 | Anderson, R. Scott; Smith, Susan J.. Hospital Flat Meadow | 10.21233/TKYE-1Z45 |
| Mica Lake | 46803 | 60.69 | -148.14 | 60.69 | 100 | Anderson, R. Scott. Mica Lake | 10.21233/Z852-D390 |
| Hall's Cave | 47259 | 29.97 | -99.38 | 29.97 | 677 | Cordova, Carlos E.. Hall's Cave | 10.21233/AEXN-ZW54 |
| Seal Beach wetland | 47506 | 33.74 | -118.08 | 33.74 | 1 | Wigand, Peter E.. Seal Beach wetland | 10.21233/6M1T-DA61 |
| Blackwood Sinkhole | 47527 | 26.8 | -77.42 | 26.8 | 0 | Fall, Patricia Lynn. Blackwood Sinkhole | 10.21233/F7JJ-4741 |
| Nunalleq | 47535 | 59.72 | -161.84 | 59.72 | 8 | Ledger, Paul M.. Nunalleq | 10.21233/SZ9R-Q288 |
| Cupola Pond | 47555 | 36.8 | -91.09 | 36.8 | 243 | Jackson, Stephen T.; Jones, Rachel A.; Williams, John W.. Cupola Pond | 10.21233/NQHZ-XW16 |
| Cupola Pond | 47557 | 36.8 | -91.09 | 36.8 | 243 | Jackson, Stephen T.; Jones, Rachel A.; Williams, John W.. Cupola Pond | 10.21233/KHZZ-1827 |
| Mobile Bay, MB0810-GC20 | 47599 | 30.29 | -87.88 | 30.29 | 0 | Jones, Miriam C.. Mobile Bay, MB0810-GC20 | 10.21233/TSWK-BC56 |
| St. Catherines Island (Northwest Marsh) | 47602 | 31.69 | -81.15 | 31.69 | 0 | Rich, Fredrick J.. St. Catherines Island (Northwest Marsh) | 10.21233/VW7G-2J12 |
| Chickaree Lake | 47610 | 40.33 | -105.84 | 40.33 | 2796 | Briles, Christy E.; Chileen, Barrie Victoria; Derr, Kelly M.; Dunnette, Paul V.. Chickaree Lake | 10.21233/RP9D-AX89 |
| Swan Lake | 47687 | 42.29 | -111.99 | 42.29 | 1450 | Bright, Robert C.. Swan Lake | 10.21233/XXP4-Z127 |
| Croton Springs | 47754 | 32.16 | -109.93 | 32.16 | 1266 | Hevly, Richard H.; Martin, Paul S.. Croton Springs | 10.21233/FDT5-2A35 |
| Croton Springs | 47758 | 32.16 | -109.93 | 32.16 | 1266 | Hevly, Richard H.; Martin, Paul S.. Croton Springs | 10.21233/84S9-1P95 |
| Sunken Island Lake | 48361 | 60.59 | -150.89 | 60.59 | 76 | Anderson, R. Scott. Sunken Island Lake | 10.21233/ZF2K-PA43 |
| Choquette Lake | 48363 | 59.95 | -151.11 | 59.95 | 517 | Anderson, R. Scott. Choquette Lake | 10.21233/5XXJ-GH64 |
| Wawona Meadow | 48549 | 37.53 | -119.65 | 37.53 | 1275 | Anderson, R. Scott. Wawona Meadow | 10.21233/DTAC-5E13 |
| Nelson Lake | 48685 | 41.84 | -88.38 | 41.84 | 211 | Grimm, Eric Christopher. Nelson Lake | 10.21233/SGDB-KE21 |
| Day Wash #14 | 48708 | 34.3 | -110.65 | 34.3 | NA | Roos, Christopher Izaak. Day Wash #14 | 10.21233/7ZM0-YR38 |
| Forestdale Valley | 48712 | 34.12 | -110.11 | 34.12 | NA | Roos, Christopher Izaak. Forestdale Valley | 10.21233/NV34-5R58 |
| Gund Ranch | 48717 | 39.9 | -116.59 | 39.9 | NA | Brugger, Sandra O.; Rhode, David E.. Gund Ranch | 10.21233/PKNS-8W97 |
| Forestdale Valley | 48719 | 34.12 | -110.11 | 34.12 | NA | Roos, Christopher Izaak. Forestdale Valley | 10.21233/DSZB-2590 |
| Emile Lake | 48721 | 64.05 | -114.11 | 64.05 | NA | Gaboriau, Dorian M.. Emile Lake | 10.21233/5VX9-SS88 |
| Cheney Lake | 48723 | 46.38 | -91.7 | 46.38 | NA | Calcote, Randy; Lynch, Elizabeth A.. Cheney Lake | 10.21233/TFX7-CJ83 |
| Forestdale Valley | 48726 | 34.12 | -110.11 | 34.12 | NA | Roos, Christopher Izaak. Forestdale Valley | 10.21233/X5DC-3883 |
| Forestdale Valley | 48728 | 34.12 | -110.11 | 34.12 | NA | Roos, Christopher Izaak. Forestdale Valley | 10.21233/WGEP-AG42 |
| Cheney Lake | 48730 | 46.38 | -91.7 | 46.38 | NA | Calcote, Randy; Hotchkiss, Sara C.; Lynch, Elizabeth A.; Nevada-Plagemann, Christopher. Cheney Lake | 10.21233/ZGRQ-ZK62 |
| Dune Pond | 48740 | 34.41 | -119.88 | 34.41 | NA | Ejarque, Ana. Dune Pond | 10.21233/9FCG-5853 |
| Rocky Draw | 48750 | 34.29 | -110.44 | 34.29 | NA | Roos, Christopher Izaak. Rocky Draw | 10.21233/JDXD-YB11 |
| Sharp Hollow | 48771 | 34.31 | -110.81 | 34.31 | NA | Roos, Christopher Izaak. Sharp Hollow | 10.21233/6E72-A140 |
| Benfield Lake | 48812 | 46.54 | -92.6 | 46.54 | NA | Jackson, Stephen T.; Minckley, Thomas A.. Benfield Lake | 10.21233/4HW4-J989 |
| Borden Lake | 48814 | 46.19 | -89.7 | 46.19 | NA | Jackson, Stephen T.; Urban, Michael A.. Borden Lake | 10.21233/K30V-RR04 |
| Ackerman Lake | 48816 | 46.33 | -86.8 | 46.33 | NA | Booth, Robert K.; Jackson, Stephen T.; Reeves, Kelly M.. Ackerman Lake | 10.21233/W5VE-GM98 |
| Hells Kitchen Lake | 48818 | 46.19 | -89.7 | 46.19 | 488 | Jackson, Stephen T.; Minckley, Thomas A.; Urban, Michael A.. Hells Kitchen Lake | 10.21233/87RR-CG11 |
| BB02 | 48846 | 35.83 | -106.62 | 35.83 | NA | Roos, Christopher Izaak. BB02 | 10.21233/2CFG-GQ96 |
| CBS3 | 48849 | 35.83 | -106.72 | 35.83 | NA | Roos, Christopher Izaak. CBS3 | 10.21233/N2Q9-EX93 |
| Lake Fork Canyon | 48854 | 35.86 | -106.73 | 35.86 | NA | Roos, Christopher Izaak. Lake Fork Canyon | 10.21233/C77E-S992 |
| MCA4 | 48857 | 35.79 | -106.63 | 35.79 | NA | Roos, Christopher Izaak. MCA4 | 10.21233/2T4D-GC60 |
| Ackerman Lake | 48861 | 46.33 | -86.8 | 46.33 | NA | Booth, Robert K.; Jackson, Stephen T.; Reeves, Kelly M.. Ackerman Lake | 10.21233/DHGY-BX66 |
| South Kratt Lake | 48873 | 46.84 | -88.86 | 46.84 | NA | Jackson, Stephen T.; Minckley, Thomas A.. South Kratt Lake | 10.21233/17XZ-SB06 |
| Trout Lake | 48879 | 46.86 | -87.9 | 46.86 | 252 | Jackson, Stephen T.; Jones, R. L.; Lesser, Mark; Minckley, Thomas A.. Trout Lake | 10.21233/HGA4-AN42 |
| Wichser Lake | 48881 | 45.24 | -88.68 | 45.24 | NA | Andersen, Jennifer Jewell; Jackson, Stephen T.. Wichser Lake | 10.21233/KVZD-F085 |
| Young Lake | 48887 | 46.44 | -85.72 | 46.44 | NA | Anderson, Jennifer Jewell; Jackson, Stephen T.; Jones, Rachel A.; Reeves, Kelly M.. Young Lake | 10.21233/ZFNJ-SM40 |
| Young Lake | 48889 | 46.44 | -85.72 | 46.44 | NA | Anderson, Jennifer Jewell; Jackson, Stephen T.; Jones, Rachel A.; Reeves, Kelly M.. Young Lake | 10.21233/26RB-9Z14 |
| Partridge Lake | 48893 | 47.42 | -88.01 | 47.42 | NA | Booth, Robert K.; Jackson, Stephen T.. Partridge Lake | 10.21233/QYVH-A253 |
| Partridge Lake | 48895 | 47.42 | -88.01 | 47.42 | NA | Booth, Robert K.; Jackson, Stephen T.. Partridge Lake | 10.21233/D6M9-0W91 |
| Clear Lake | 489 | 43.13 | -93.43 | 43.13 | 374 | Baker, Richard G.. Clear Lake | 10.21233/n3c026 |
| Lake Ann | 48906 | 46.87 | -87.93 | 46.87 | 256 | Andersen, Jennifer Jewell; Jackson, Stephen T.. Lake Ann | 10.21233/PVRW-DB73 |
| Lake Ann | 48907 | 46.87 | -87.93 | 46.87 | 256 | Andersen, Jennifer Jewell; Jackson, Stephen T.. Lake Ann | 10.21233/YZE1-MQ71 |
| Lake Ann | 48908 | 46.87 | -87.93 | 46.87 | 256 | Andersen, Jennifer Jewell; Jackson, Stephen T.. Lake Ann | 10.21233/K4Z5-VW74 |
| Lake Ann | 48909 | 46.87 | -87.93 | 46.87 | 256 | Andersen, Jennifer Jewell; Jackson, Stephen T.. Lake Ann | 10.21233/MW59-QE59 |
| Etang Fer-de-Lance | 48911 | 45.36 | -72.23 | 45.36 | NA | Sanger, Claire O'Neill. Etang Fer-de-Lance | 10.21233/EHX3-MW19 |
| Etang Fer-de-Lance | 48912 | 45.36 | -72.23 | 45.36 | NA | Sanger, Claire O'Neill. Etang Fer-de-Lance | 10.21233/4JTC-M442 |
| Clear Lake | 490 | 41.64 | -86.54 | 41.64 | 244 | Bailey, Robert E.. Clear Lake | 10.21233/n3761n |
| Clear Pond | 492 | 33.8 | -78.95 | 33.8 | 10 | Hussey, Tristram C.. Clear Pond | 10.21233/n3jt55 |
| Clear Pond | 494 | 43.75 | -74.02 | 43.75 | 513 | Winkler, Marjorie Green. Clear Pond | 10.21233/n3999b |
| Coghill Lake | 496 | 53.9 | -66.77 | 53.9 | 530 | King, George A.. Coghill Lake | 10.21233/n31t44 |
| Colo Marsh | 497 | 42.02 | -93.27 | 42.02 | 329 | Baker, Richard G.. Colo Marsh | 10.21233/n3b02w |
| Columbine Ranch Fen | 498 | 37.61 | -107.82 | 37.61 | 2694 | Maher, Louis J., Jr.. Columbine Ranch Fen | 10.21233/n36900 |
| Comb Lake | 500 | 49.69 | -57.71 | 49.69 | 678 | McAndrews, John H.. Comb Lake | 10.21233/n32g74 |
| Compass Pond | 501 | 50.03 | -56.2 | 50.03 | 236 | Macpherson, Joyce B.. Compass Pond | 10.21233/n3ht33 |
| Conroy Lake | 503 | 46.28 | -67.88 | 46.28 | 137 | Gajewski, Konrad J.. Conroy Lake | 10.21233/n38978 |
| Copley Lake | 506 | 38.87 | -107.08 | 38.87 | 3250 | Fall, Patricia Lynn. Copley Lake | 10.21233/n34m74 |
| Coppermine Saddleback | 507 | 67.83 | -115.32 | 67.83 | 43 | Nichols, Harvey. Coppermine Saddleback | 10.21233/n30t3f |
| Lac Côté | 508 | 48.97 | -65.95 | 48.97 | 915 | Gangloff, P.; Gray, J. T.; Labelle, Claude; Larouche, Alayn C.; Richard, Pierre J. H.. Lac Côté | 10.21233/pegz-2575 |
| Tourbière de Lanoraie COTEAU JAUNE | 510 | 45.96 | -73.34 | 45.96 | 18 | Comtois, Paul G.; Larouche, Alayn C.; Richard, Pierre J. H.. Tourbière de Lanoraie COTEAU JAUNE | 10.21233/n31k6g |
| Cottonwood Lake | 513 | 44.84 | -99.91 | 44.84 | 549 | Grimm, Eric Christopher. Cottonwood Lake (Su) | 10.21233/n3798b |
| Cottonwood Pass Pond | 514 | 38.83 | -106.41 | 38.83 | 3670 | Fall, Patricia Lynn. Cottonwood Pass Pond | 10.21233/n33m6f |
| Cottonwood Lake | 515 | 45.76 | -96.02 | 45.76 | 336 | McAndrews, John H.. Cottonwood Lake | 10.21233/n3cs4w |
| Cranberry Lake | 516 | 44.1 | -78.1 | 44.1 | 170 | McAndrews, John H.. Cranberry Lake | 10.21233/n38329 |
| Crane Lake | 517 | 36.53 | -112.15 | 36.53 | 2590 | Davis, Owen K.; Shafer, David Scott. Crane Lake | 10.21233/n3489f |
| Cranberry Glades | 518 | 38.2 | -80.28 | 38.2 | 1029 | Watts, William A.. Cranberry Glades | 10.21233/n30k7j |
| Crates Lake | 519 | 49.18 | -81.27 | 49.18 | 259 | Liu, Kam-biu. Crates Lake | 10.21233/n3fx3h |
| Crawford Lake | 520 | 43.47 | -79.95 | 43.47 | 278 | McAndrews, John H.. Crawford Lake | 10.21233/n3b39k |
| Crazy Pond | 521 | 47.18 | -95.73 | 47.18 | 457 | McAndrews, John H.. Crazy Pond | 10.21233/n36d9f |
| Crider's Pond | 523 | 39.97 | -77.55 | 39.97 | 290 | Watts, William A.. Crider's Pond | 10.21233/n3bs5z |
| Cristal Lake | 524 | 52.12 | -90.08 | 52.12 | 355 | Björck, Svante. Cristal Lake | 10.21233/ecm1-wf91 |
| Crowfoot Lake | 525 | 51.65 | -116.42 | 51.65 | 1940 | Reasoner, Mel A.. Crowfoot Lake | 10.21233/n33902 |
| Crowsnest Lake | 527 | 68.33 | -146.48 | 68.33 | 881 | Anderson, Patricia M.. Crowsnest Lake | 10.21233/n3dx36 |
| Cub Lake | 532 | 44.7 | -84.96 | 44.7 | 360 | Rasmussen, Jack B.. Cub Lake | 10.21233/n31q43 |
| Cub Creek Pond | 533 | 44.51 | -110.25 | 44.51 | 2500 | Wright, Herbert E., Jr.. Cub Creek Pond | 10.21233/n39w49 |
| Cub Lake | 534 | 44.12 | -111.18 | 44.12 | 1840 | Baker, Richard G.. Cub Lake | 10.21233/n36319 |
| Cummins Pond | 538 | 48.41 | -89.35 | 48.41 | 229 | McAndrews, John H.. Cummins Pond | 10.21233/n38719 |
| Cupola Pond | 539 | 36.8 | -91.09 | 36.8 | 243 | Smith, Everett Newman, Jr.. Cupola Pond | 10.21233/n34d72 |
| Cygnet Lake Fen | 543 | 44.65 | -110.6 | 44.65 | 2530 | Whitlock, Cathy. Cygnet Lake Fen | 10.21233/n3532c |
| Dalton Lake | 545 | 46.17 | -95.92 | 46.17 | 418 | McAndrews, John H.. Dalton Lake | 10.21233/n3gq5h |
| Dark Lake | 546 | 45.27 | -91.47 | 45.27 | 334 | Winkler, Marjorie Green. Dark Lake | 10.21233/n3bx26 |
| Daumont | 549 | 54.88 | -69.4 | 54.88 | 607 | Bouchard, Michel A.; Larouche, Alayn C.; Richard, Pierre J. H.. Daumont | 10.21233/n3cp6m |
| Davis Lake | 550 | 46.59 | -122.25 | 46.59 | 282 | Whitlock, Cathy. Davis Lake | 10.21233/n37w39 |
| Decoy Lake | 672 | 43.23 | -80.37 | 43.23 | 260 | Szeicz, Julian M.. Decoy Lake | 10.21233/n32x33 |
| Deer Lake Bog | 673 | 44.03 | -71.83 | 44.03 | 1325 | Spear, Ray W.. Deer Lake Bog | 10.21233/n3c33m |
| Delorme 1 | 675 | 54.42 | -69.92 | 54.42 | 513 | Bouchard, Michel A.; Larouche, Alayn C.; Richard, Pierre J. H.. Delorme 1 | 10.21233/n33k8v |
| Delorme 2 | 677 | 54.42 | -69.93 | 54.42 | 538 | Bouchard, Michel A.; Larouche, Alayn C.; Richard, Pierre J. H.. Delorme 2 | 10.21233/n3f40f |
| Lac Demain | 678 | 62.05 | -118.7 | 62.05 | 745 | MacDonald, Glen. Lac Demain | 10.21233/n39d80 |
| Demont Lake | 679 | 43.48 | -85 | 43.48 | 248 | Kapp, Ronald O.. Demont Lake | 10.21233/n35m5p |
| Denton Lake | 681 | 45.85 | -89.31 | 45.85 | 500 | Shane, Linda C. K.. Denton Lake | 10.21233/n3b31j |
| Devils Lake, Main Bay | 683 | 48.03 | -98.95 | 48.03 | 443 | McAndrews, John H.. Devils Lake, Main Bay | 10.21233/n32k6s |
| Devils Lake | 684 | 43.42 | -89.73 | 43.42 | 294 | Maher, Louis J., Jr.. Devils Lake | 10.21233/n3hx4h |
| Devon Island Glacier | 685 | 75.35 | -82.5 | 75.35 | 1800 | McAndrews, John H.. Devon Island Glacier | 10.21233/n3d42w |
| Diana 375 | 688 | 60.99 | -69.96 | 60.99 | 114 | Larouche, Alayn C.; Richard, Pierre J. H.. Diana 375 | 10.21233/n30x3g |
| Dinkey Meadow | 693 | 37 | -119.08 | 37 | 1683 | Davis, Owen K.. Dinkey Meadow | 10.21233/n3c70v |
| Dismal Swamp (91) | 699 | 36.58 | -76.45 | 36.58 | 6 | Whitehead, Donald R.. Dismal Swamp (91) | 10.21233/n37d70 |
| Three Pines Bog | 7 | 47 | -80.12 | 47 | 294 | McAndrews, John H.. Three Pines Bog | 10.21233/n3bc7k |
| Disterhaft Farm Bog | 700 | 43.92 | -89.17 | 43.92 | 244 | Maher, Louis J., Jr.. Disterhaft Farm Bog | 10.21233/n33q6g |
| Divide Lake | 701 | 43.93 | -110.23 | 43.93 | 2628 | Whitlock, Cathy. Divide Lake | 10.21233/n3cw3j |
| Dogfish Lake | 717 | 48.18 | -92.18 | 48.18 | NA | Waddington, Jean Constance Bassett. Dogfish Lake | 10.21233/n3b038 |
| Dome Creek Meadow | 719 | 40.02 | -107.05 | 40.02 | 3165 | Feiler, Eric J.. Dome Creek Meadow | 10.21233/n3660z |
| Donut Pond Bog | 721 | 41.27 | -70.06 | 41.27 | 4 | Dunwiddie, Peter W.. Donut Pond Bog | 10.21233/n3hq5t |
| Dosquet | 722 | 46.45 | -71.5 | 46.45 | 140 | Larouche, Alayn C.; Richard, Pierre J. H.. Dosquet | 10.21233/n3d137 |
| Duck Pond | 772 | 41.93 | -70 | 41.93 | 2 | Winkler, Marjorie Green. Duck Pond | 10.21233/n32d96 |
| Lac Dufresne | 773 | 45.85 | -70.35 | 45.85 | 650 | Mott, Robert J.. Lac Dufresne | 10.21233/n3bk68 |
| Dunnigan Lake | 774 | 47.71 | -91.63 | 47.71 | 506 | Shane, Linda C. K.. Dunnigan Lake | 10.21233/n36w5r |
| Eagle Lake Bog | 776 | 44.17 | -71.67 | 44.17 | 1275 | Spear, Ray W.. Eagle Lake Bog | 10.21233/n3jd85 |
| Eagle Lake | 777 | 53.23 | -58.55 | 53.23 | 400 | Lamb, Henry F.. Eagle Lake | 10.21233/n3dq5w |
| Eaglenest Lake | 778 | 57.77 | -112.1 | 57.77 | 725 | Vance, Robert E.. Eaglenest Lake | 10.21233/n38x2k |
| East Twin Lake | 781 | 45.33 | -93.51 | 45.33 | 281 | McAndrews, John H.. East Twin Lake | 10.21233/n39p60 |
| East Baltic Bog | 782 | 46.41 | -62.15 | 46.41 | 45 | Anderson, Thane W.. East Baltic Bog | 10.21233/n35w3p |
| Edward Lake | 785 | 44.37 | -80.25 | 44.37 | 518 | McAndrews, John H.. Edward Lake | 10.21233/n3cq6z |
| Eggert Lake | 786 | 44.47 | -93.62 | 44.47 | 312 | McAndrews, John H.. Eggert Lake | 10.21233/n3812m |
| Eldora Fen | 790 | 39.94 | -105.58 | 39.94 | 2848 | Maher, Louis J., Jr.. Eldora Fen | 10.21233/n30h6g |
| Ely Lake | 795 | 41.77 | -75.83 | 41.77 | 384 | Winkler, Marjorie Green. Ely Lake | 10.21233/n3bq4w |
| Emerald Lake | 796 | 44.07 | -110.3 | 44.07 | 2634 | Whitlock, Cathy. Emerald Lake | 10.21233/n3713p |
| Abalone Rocks Marsh | 8 | 33.96 | -119.98 | 33.96 | 0 | Cole, Kenneth L.. Abalone Rocks Marsh | 10.21233/n36p49 |
| Ennadai Lake, 1972 Site | 802 | 61.24 | -100.95 | 61.24 | 325 | Nichols, Harvey. Ennadai Lake, 1972 Site | 10.21233/n3061g |
| Ennadai Lake | 803 | 61.17 | -100.92 | 61.17 | 168 | Nichols, Harvey. Ennadai Lake | 10.21233/n3fh88 |
| Lake Erie | 805 | 41.92 | -82.76 | 41.92 | 168 | McAndrews, John H.. Lake Erie | 10.21233/n36120 |
| Ernst Brother's Pit | 806 | 43.23 | -88.04 | 43.23 | 244 | Maher, Louis J., Jr.. Ernst Brother's Pit | 10.21233/n3298s |
| East Sooke Fen | 808 | 48.35 | -123.68 | 48.35 | 155 | Brown, Kendrick J.. East Sooke Fen | 10.21233/m5dr-hs85 |
| Lac à la Fourche | 810 | 47.61 | -70.62 | 47.61 | 305 | Labelle, Claude; Larouche, Alayn C.; Richard, Pierre J. H.. Lac à la Fourche | 10.21233/f915-bn91 |
| Etivlik Lake | 811 | 68.13 | -156.03 | 68.13 | 631 | Anderson, Patricia M.. Etivlik Lake | 10.21233/n3j99h |
| East Twin Lake | 813 | 41.2 | -81.33 | 41.2 | 321 | Shane, Linda C. K.. East Twin Lake | 10.21233/n38t5p |
| Excelsior Basin | 815 | 52.78 | -117.12 | 52.78 | NA | Kearney, Michael S.. Excelsior Basin | 10.21233/n31b0s |
| Exchequer Meadow | 816 | 37 | -119.83 | 37 | 2219 | Davis, Owen K.. Exchequer Meadow | 10.21233/n39g8p |
| Faith Pond | 817 | 47.27 | -96.09 | 47.27 | 347 | McAndrews, John H.. Faith Pond | 10.21233/n35s5d |
| Fallback Lake | 818 | 43.97 | -110.43 | 43.97 | 2597 | Whitlock, Cathy. Fallback Lake | 10.21233/n3203s |
| Lac Faribault | 820 | 58.87 | -71.72 | 58.87 | 250 | Larouche, Alayn C.; Richard, Pierre J. H.. Lac Faribault | 10.21233/n3cm5j |
| Tourbière de Farnham | 821 | 45.28 | -72.98 | 45.28 | 53 | Larouche, Alayn C.; Lavoie, Martin; Richard, Pierre J. H.. Tourbière de Farnham | 10.21233/n37t40 |
| Farquar Lake | 822 | 44.76 | -93.16 | 44.76 | 273 | McAndrews, John H.. Farquar Lake | 10.21233/n3440n |
| Fawn Lake (CA:Ontario) | 823 | 45.41 | -79.39 | 45.41 | 333 | McAndrews, John H.. Fawn Lake (CA:Ontario) | 10.21233/n3099j |
| Fawn Lake | 824 | 46.22 | -94.75 | 46.22 | 387 | McAndrews, John H.. Fawn Lake | 10.21233/n38g8c |
| Ferndale Bog | 828 | 34.41 | -95.81 | 34.41 | 263 | Albert, Lois E.. Ferndale Bog | 10.21233/n3g99w |
| Fiddler's Pond | 829 | 56.25 | -121.42 | 56.25 | 630 | White, James M.. Fiddler's Pond | 10.21233/n3bm6m |
| First | 831 | 41.14 | -75.03 | 41.14 | 326 | Russell Southgate, Emily W. B.. First | 10.21233/n33423 |
| Fish Lake | 832 | 73.03 | -85.22 | 73.03 | 91 | Short, Susan K.. Fish Lake | 10.21233/n3c90j |
| Beaverhouse Lake | 834 | 54.74 | -101.68 | 54.74 | 305 | Ritchie, James C.. Beaverhouse Lake | 10.21233/n37k7q |
| Floating Island Lake | 835 | 44.55 | -107.47 | 44.55 | 2609 | Baker, Richard G.. Floating Island Lake | 10.21233/n33s5s |
| Forest Pond 2 | 843 | 43.44 | -109.95 | 43.44 | 2766 | Lynch, Elizabeth A.. Forest Pond 2 | 10.21233/n36k8s |
| Forest Lake | 844 | 46.45 | -112.17 | 46.45 | 1895 | Brant, Lynn A.. Forest Lake | 10.21233/n32s6v |
| Forge Pond | 845 | 40.86 | -74.4 | 40.86 | 69 | Russell Southgate, Emily W. B.. Forge Pond | 10.21233/n3j41r |
| Fox Pond | 846 | 47.16 | -95.56 | 47.16 | NA | McAndrews, John H.. Fox Pond | 10.21233/n3dd8x |
| Frains Lake | 847 | 42.33 | -83.63 | 42.33 | 271 | Kerfoot, Wilson Charles. Frains Lake | 10.21233/n38m5m |
| Hayes Lake | 849 | 49.58 | -93.75 | 49.58 | 391 | McAndrews, John H.. Hayes Lake | 10.21233/n34x5g |
| French Lake | 850 | 44.95 | -94.42 | 44.95 | 327 | Grimm, Eric Christopher. French Lake | 10.21233/n3142g |
| Frenchmens Bay | 851 | 43.82 | -79.1 | 43.82 | 75 | McAndrews, John H.. Frenchmens Bay | 10.21233/n39c91 |
| Frying Pan Lake | 853 | 38.62 | -111.67 | 38.62 | 2720 | Davis, Owen K.; Shafer, David Scott. Frying Pan Lake | 10.21233/n31w4t |
| Fudger Lake | 855 | 40.1 | -83.53 | 40.1 | 320 | Shane, Linda C. K.. Fudger Lake | 10.21233/n3cd90 |
| Furnival Lake | 856 | 48.21 | -84.93 | 48.21 | 440 | McAndrews, John H.. Furnival Lake | 10.21233/n37q6q |
| Saint-Gabriel | 857 | 46.28 | -73.48 | 46.28 | 250 | Larouche, Alayn C.; Richard, Pierre J. H.. Saint-Gabriel | 10.21233/n33x55 |
| Gardiner's Hole | 859 | 44.92 | -110.73 | 44.92 | 2215 | Baker, Richard G.. Gardiner's Hole | 10.21233/n38d11 |
| Gass Lake | 860 | 44.05 | -87.73 | 44.05 | 211 | Webb, Sara L.. Gass Lake | 10.21233/n34k85 |
| Georgian Bay, Lake Huron (1) | 862 | 44.74 | -80.86 | 44.74 | 176 | McAndrews, John H.. Georgian Bay, Lake Huron (1) | 10.21233/n3g715 |
| Georgian Bay, Lake Huron (2) | 863 | 45.17 | -81.32 | 45.17 | 176 | McAndrews, John H.. Georgian Bay, Lake Huron (2) | 10.21233/n3bd89 |
| Lac Geai | 865 | 46 | -73.99 | 46 | 365 | Larouche, Alayn C.; Richard, Pierre J. H.. Lac Geai | 10.21233/n32x4g |
| George (BE) | 869 | 44.23 | -93.87 | 44.23 | 300 | McAndrews, John H.. George (BE) | 10.21233/n33p64 |
| Lac à St-Germain | 871 | 45.95 | -74.37 | 45.95 | 473 | Larouche, Alayn C.; Richard, Pierre J. H.; Savoie, Louise. Lac à St-Germain | 10.21233/n3f71v |
| Giles | 873 | 41.38 | -75.09 | 41.38 | 732 | Russell Southgate, Emily W. B.. Giles | 10.21233/n35q7g |
| Upper Gillies Lake | 874 | 46.07 | -60.39 | 46.07 | 81 | Livingstone, Daniel A.. Upper Gillies Lake | 10.21233/n3212r |
| Glacial Lake | 875 | 64.87 | -166.27 | 64.87 | 120 | Eisner, Wendy R.. Glacial Lake | 10.21233/n3b63b |
| Jones Lake [Glenboro site] | 878 | 49.45 | -99.29 | 49.45 | 409 | Ritchie, James C.. Jones Lake [Glenboro site] | 10.21233/n3j13g |
| Goff Lake | 965 | 44.45 | -109.84 | 44.45 | 1996 | Wright, Herbert E., Jr.. Goff Lake | 10.21233/n3914p |
| Gold Lake Bog | 966 | 43.65 | -122.04 | 43.65 | 1465 | Sea, Debra S.; Whitlock, Cathy. Gold Lake Bog | 10.21233/n35993 |
| Goldsmith Lake | 967 | 46.58 | -92.47 | 46.58 | NA | McAndrews, John H.. Goldsmith Lake | 10.21233/n31h75 |
| Goshen Springs | 969 | 31.72 | -86.13 | 31.72 | 105 | Delcourt, Paul A.. Goshen Springs | 10.21233/n3604d |
| Gould Pond | 971 | 44.98 | -69.32 | 44.98 | 89 | Jacobson, G.. Gould Pond | 10.21233/n3hh7h |
| Gould's Bog | 972 | 42.53 | -72.18 | 42.53 | 338 | Davis, Margaret B.. Gould's Bog | 10.21233/n3ct60 |
| Graham Lake | 973 | 45.18 | -77.35 | 45.18 | 381 | Fuller, Janice L.. Graham Lake | 10.21233/n38130 |
| Grand Rapids | 974 | 53 | -98.25 | 53 | 350 | Ritchie, James C.. Grand Rapids | 10.21233/n34b0q |
| Grant Lake | 975 | 64.72 | -100.47 | 64.72 | 204 | Kay, Paul A.. Grant Lake | 10.21233/n30h7v |
| Lac Gras | 976 | 52.25 | -67.07 | 52.25 | 530 | King, George A.. Lac Gras | 10.21233/n38s5b |
| Gravel Ridge | 978 | 55.03 | -62.63 | 55.03 | 565 | Lamb, Henry F.. Gravel Ridge | 10.21233/n3191t |
| Green Point Pond | 981 | 49.67 | -57.95 | 49.67 | 2 | McAndrews, John H.. Green Point Pond | 10.21233/n3gm77 |
| Green Lake | 982 | 44.88 | -85.12 | 44.88 | 305 | Lawrenz, Ronald W.. Green Lake | 10.21233/n3bt6p |
| Grenadier Pond | 986 | 43.64 | -79.47 | 43.64 | 76 | McAndrews, John H.. Grenadier Pond | 10.21233/n3cg9p |
| Grey Islands | 987 | 50.77 | -55.52 | 50.77 | 104 | Cullen, Nicola S.. Grey Islands | 10.21233/n37s6d |
| Grice Pond | 990 | 47.2 | -95.76 | 47.2 | 453 | McAndrews, John H.. Grice Pond | 10.21233/n3fm89 |
| Guardipee Lake | 991 | 48.55 | -112.72 | 48.55 | 1233 | Whitlock, Cathy. Guardipee Lake | 10.21233/n39t4m |
| Water Conservation Area 3B, Gumbo Limbo Dry Head | 992 | 25.77 | -80.51 | 25.77 | 5 | Willard, Debra A.. Water Conservation Area 3B, Gumbo Limbo Dry Head | 10.21233/n36421 |
| Water Conservation Area 3B, Gumbo Limbo Far Tail | 993 | 25.77 | -80.51 | 25.77 | 5 | Willard, Debra A.. Water Conservation Area 3B, Gumbo Limbo Far Tail | 10.21233/n32995 |
| Water Conservation Area 3B, Gumbo Limbo Marsh | 994 | 25.78 | -80.51 | 25.78 | 5 | Willard, Debra A.. Water Conservation Area 3B, Gumbo Limbo Marsh | 10.21233/n3bk7n |
| Water Conservation Area 3B, Gumbo Limbo Near Tail | 995 | 25.89 | -80.56 | 25.89 | 5 | Willard, Debra A.. Water Conservation Area 3B, Gumbo Limbo Near Tail | 10.21233/n36s5q |
| Water Conservation Area 3B, Gumbo Limbo Wet Head | 996 | 25.77 | -80.51 | 25.77 | 5 | Willard, Debra A.. Water Conservation Area 3B, Gumbo Limbo Wet Head | 10.21233/n33334 |
| Hack Pond | 999 | 37.98 | -79 | 37.98 | 469 | Craig, Alan J.. Hack Pond | 10.21233/n38x3z |
